# Supplementary material for: Asymmetric construction of quaternary stereocenters by magnesium catalysed direct amination of β-ketoesters using in situ generated nitrosocarbonyl compounds as nitrogen sources
Source: Royal Society of Chemistry journal article supplement (doi:10.1039/c4sc01272k), 2014-01-01
Supplement: c4sc01272k1.pdf [file c4sc01272k1.pdf]

- Electronic Supplementary Information -

**Asymmetric construction of quaternary stereocenters by magnesium catalyzed direct amination of  $\beta$ -ketoesters using in situ generated nitrosocarbonyl compounds as nitrogen sources**

Biplab Maji,\* Mahiuddin Baidya, and Hisashi Yamamoto\*

Molecular Catalyst Research Center  
Chubu University  
1200 Matsumoto-cho, Kasugai, Aichi 487-8501, Japan  
Fax: (+) 81-568-51-3833  
E-mail: biplabmaji@isc.chubu.ac.jp, hyamamoto@isc.chubu.ac.jp  
Homepage: <http://www3.chubu.ac.jp/catalyst/>

## 1. General methods.

*Chemicals.*  $\beta$ -ketoesters **1a**<sup>S1</sup>, **1b**<sup>S2</sup>, **1c-g**,<sup>S3</sup> **1h-l**,<sup>S4</sup> **1m**,<sup>S5</sup> **1n-q**,<sup>S6</sup> and **1r-s**<sup>S7</sup> were prepared according to the literature procedure. Ligands **L3-6** were prepared according to the procedure described by Feng.<sup>S8</sup> Anhydrous THF, CH<sub>2</sub>Cl<sub>2</sub>, and Et<sub>2</sub>O were dried with Glass Contour solvent purification system. All other chemicals were purchased from their commercial sources and used as it received.

### *Analytics.*

NMR spectra were recorded on a JEOL JNM LA-400 (400 MHz for <sup>1</sup>H NMR and 100 MHz for <sup>13</sup>C NMR). Chemical shifts were reported in ppm on the  $\delta$  scale relative to Me<sub>4</sub>Si ( $\delta$  = 0 for <sup>1</sup>H NMR), CDCl<sub>3</sub> ( $\delta$  = 77.2 for <sup>13</sup>C NMR) as an internal reference. Multiplicities are indicated as: br (broad), s (singlet), d (doublet), t (triplet), dd (doublet of doublet), or m (multiplet). Coupling constants (*J*) are reported in Hertz (Hz). ESI mass spectra were measured on a Bruker Daltonics micrOTOF. High performance liquid chromatography (HPLC) was performed on Agilent Technologies 1220 Infinity LC instruments using Daicel Chiralpak AD-H, OD-H, and AS-H 4.6 mm  $\times$  25 cm column. Optical rotations were measured on an ATAGO CO., LTD AP-300 polarimeter. Column chromatography was conducted with silica gel 60 N (KANTO CHEMICAL, spherical, neutral, 40-50 or 63-210  $\mu$ m). For thin-layer chromatography (TLC) analysis Merck precoated TLC plates (silica gel 60 F254 0.25 mm) were used. Visualization was accomplished by UV light (254 nm), I<sub>2</sub>, anisaldehyde, KMnO<sub>4</sub>, and phosphomolybdic acid.

## 2.*N*-nitroso aldol reaction with in situ generated nitrosocarbonyl compounds.

### General procedure:

Mg(OTf)<sub>2</sub> (2.0 mg, 0.006 mmol) and **L3** (4.8 mg, 0.0075 mmol) were taken in a 16 × 100 mm test tube equipped with a magnetic stirr bar and a rubber septum. The test tube was evacuated and carefully purged with nitrogen. CH<sub>2</sub>Cl<sub>2</sub> (1 mL) was added to it and the suspension was stirred for 1.5 h. After that a CH<sub>2</sub>Cl<sub>2</sub> (1 mL) solution of the ketoester (0.1 mmol) was added and the mixture was further stirred for another 30 min. Under a gentle pressure of nitrogen the septum was uncapped and solid MnO<sub>2</sub> (42 mg, 4.8 mmol) was added in one portion. Then a CH<sub>2</sub>Cl<sub>2</sub> (1 mL) solution of the *N*-protected hydroxamic acid (0.12 mmol) was slowly added via a syringe pump over 15 h at room temperature (23 °C). The mixture was allowed to stir for an additional 1 h before it was directly loaded into a column packed with silica gel and purified using EtOAc/*n*-hexane (1:4 to 1:3) as eluent to afford the *N*-NA products **3**.

All the recimic sample were similarly prepared using 10 mol% of Mg(OTf)<sub>2</sub> in combination with 20 mol% 2-ethyl oxazoline.

**3a**: Prepared according to general procedure. 30.5 mg, 91%. 68% ee. <sup>1</sup>H NMR (400 MHz, CDCl<sub>3</sub>): δ = 1.25 (t, *J* = 7.1 Hz, 3 H), 1.41 (s, 9 H), 3.30 (d, *J* = 17.0 Hz, 1 H), 4.10 (d, *J* = 17.0 Hz, 1 H), 4.24 (q, *J* = 7.1 Hz, 2 H), 6.65 (s, 1 H), 7.40 (t, *J* = 7.5 Hz, 1 H), 7.50 (d, *J* = 7.7 Hz, 1 H), 7.71 – 7.59 (m, 1 H), 7.79 (d, *J* = 7.7 Hz, 1 H) ppm. <sup>13</sup>C NMR (100 MHz, CDCl<sub>3</sub>): δ = 14.1, 28.1, 36.4, 63.0, 78.0, 84.0, 125.6, 126.4, 128.1, 133.8, 136.1, 152.4, 157.1, 166.4, 194.7 ppm. HRMS (ESI): Calculated for C<sub>17</sub>H<sub>21</sub>N<sub>1</sub>Na<sub>1</sub>O<sub>6</sub> ([M + Na]<sup>+</sup>) is 358.1261, found 358.1256. HPLC analysis: Daicel Chiralpak AS-H, hexane/*i*-PrOH = 96/4, flow rate = 1.0 mL/min, λ = 245 nm, retention time; t<sub>R</sub>(minor) = 17.3 min, t<sub>R</sub>(major) = 19.8 min.

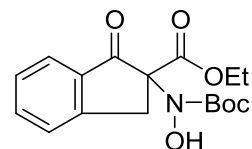

**3b**: Prepared according to general procedure. 31.8 mg, 68%. [α]<sub>D</sub><sup>25</sup> +25.2 (*c* = 0.55, CHCl<sub>3</sub>, 83% ee). <sup>1</sup>H NMR (400 MHz, CDCl<sub>3</sub>): δ = 0.83 (s, 3 H), 1.14 (s, 9 H), 1.40 (s, 9 H), 2.68 (s, 1 H), 2.74 (s, 1 H), 3.49 (d, *J* = 17.2 Hz, 1 H), 4.25 (d, *J* = 17.2 Hz, 1 H), 6.66 (s, 1 H), 7.09 (d, *J* = 7.4 Hz, 2 H), 7.17–7.19 (m, 1 H), 7.44 (t, *J* = 7.5 Hz, 1 H), 7.54 (d, *J* = 7.7 Hz, 1 H), 7.64–7.68 (m, 1 H), 7.90 (d, *J* = 7.7 Hz, 1 H) ppm. <sup>13</sup>C NMR (100 MHz, CDCl<sub>3</sub>): δ = 22.6, 22.9, 23.7, 23.9, 27.1, 27.3, 28.1, 37.4, 78.3, 84.1, 124.1, 125.6, 126.5, 127.1, 128.3, 134.3, 136.0, 140.3, 140.7, 145.4, 151.9, 156.9, 165.7, 193.5 ppm. HRMS (ESI): Calculated for C<sub>27</sub>H<sub>33</sub>N<sub>1</sub>Na<sub>1</sub>O<sub>6</sub> ([M + Na]<sup>+</sup>) is 490.2200, found 490.2207. HPLC analysis: Daicel Chiralpak OD-H, hexane/*i*-PrOH = 98/2, flow rate = 1.0 mL/min, λ = 254 nm, retention time; t<sub>R</sub>(major) = 8.7 min, t<sub>R</sub>(minor) = 11.0 min.

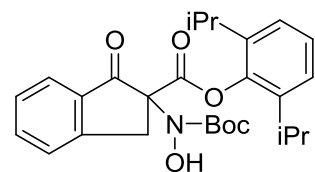

**3c**: Prepared according to general procedure. 33 mg, 91%. [α]<sub>D</sub><sup>25</sup> +129.9 (*c* = 1.32, CHCl<sub>3</sub>, 95% ee). <sup>1</sup>H NMR (400 MHz, CDCl<sub>3</sub>): δ = 1.40 (2s, 9 + 9 H), 3.29 (d, *J* = 17.0 Hz, 1H), 4.01 (d, *J* = 17.0 Hz, 1H), 6.69 (s, 1 H), 7.39 (t, *J* = 7.5 Hz, 1H), 7.48 (d, *J* = 7.7 Hz, 1H), 7.63 (t, *J* = 6.9 Hz, 1H), 7.79 (d, *J* = 7.7 Hz, 1H) ppm. <sup>13</sup>C NMR (100 MHz, CDCl<sub>3</sub>): δ = 27.9, 28.2, 37.1, 78.3, 83.6, 83.7, 125.4, 126.3, 128.0, 134.1, 135.8, 152.4, 156.9, 165.7, 194.9 ppm. HRMS (ESI): Calculated for C<sub>19</sub>H<sub>25</sub>N<sub>1</sub>Na<sub>1</sub>O<sub>6</sub> ([M + Na]<sup>+</sup>) is 386.1574, found 386.1570. HPLC analysis: Daicel Chiralpak OD-H, hexane/*i*-PrOH = 96/4, flow rate = 1.0 mL/min, λ = 245 nm, retention time; t<sub>R</sub>(minor) = 6.9 min, t<sub>R</sub>(major) = 8.2 min.

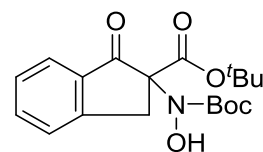

**3d:** Prepared according to general procedure. 36 mg, 94%.  $[\alpha]_D^{23} +100.6$  ( $c = 0.64$ ,  $\text{CHCl}_3$ , 95% ee).  $^1\text{H}$  NMR (400 MHz,  $\text{CDCl}_3$ ):  $\delta = 1.41$  (s, 9 H), 1.42 (s, 9 H), 3.26 (d,  $J = 17.2$  Hz, 1 H), 4.00 (d,  $J = 17.2$  Hz, 1 H), 6.67 (s, 1 H), 7.07-7.16 (m, 2 H), 7.81 (dd,  $J = 8.5, 5.3$  Hz, 1H) ppm.  $^{13}\text{C}$  NMR (100 MHz,  $\text{CDCl}_3$ ):  $\delta = 27.9, 28.2, 36.9, 78.4, 83.8, 84.0, 113.2$  (d,  $J = 22.7$  Hz), 116.4 (d,  $J = 23.9$  Hz), 127.8 (d,  $J = 10.6$  Hz), 130.5, 155.4 (d,  $J = 10.5$  Hz), 156.9, 165.4, 166.5, 169.0, 193.0 ppm. HRMS (ESI): Calculated for  $\text{C}_{19}\text{H}_{24}\text{F}_1\text{N}_1\text{Na}_1\text{O}_6$  ( $[\text{M} + \text{Na}]^+$ ) is 404.1480, found 404.1476. HPLC analysis: Daicel Chiralpak OD-H, hexane/*i*-PrOH = 97/3, flow rate = 1.0 mL/min,  $\lambda = 245$  nm, retention time;  $t_R(\text{minor}) = 7.2$  min,  $t_R(\text{major}) = 9.7$  min.

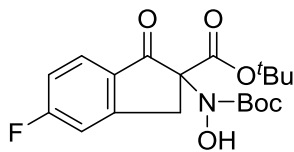

**3e:** Prepared according to general procedure. 35 mg, 89%.  $[\alpha]_D^{22} +109.3$  ( $c = 0.59$ ,  $\text{CHCl}_3$ , 93% ee).  $^1\text{H}$  NMR (400 MHz,  $\text{CDCl}_3$ ):  $\delta = 1.41$  (s, 9 H), 1.42 (s, 9 H), 3.20 (d,  $J = 17.1$  Hz, 1 H), 3.83 (s, 3 H), 4.92 (d,  $J = 16.7$  Hz, 1 H), 6.61 (s, 1 H), 7.21-7.24 (m, 2 H), 7.36-7.38 (m, 1H) ppm.  $^{13}\text{C}$  NMR (100 MHz,  $\text{CDCl}_3$ ):  $\delta = 27.9, 28.2, 36.4, 55.8, 79.0, 83.6, 83.7, 106.5, 125.2, 127.0, 135.2, 145.4, 156.9, 159.8, 165.8, 194.9$  ppm. HRMS (ESI): Calculated for  $\text{C}_{20}\text{H}_{27}\text{N}_1\text{Na}_1\text{O}_7$  ( $[\text{M} + \text{Na}]^+$ ) is 416.1680, found 416.1680. HPLC analysis: Daicel Chiralpak OD-H, hexane/*i*-PrOH = 98/2, flow rate = 1.0 mL/min,  $\lambda = 254$  nm, retention time;  $t_R(\text{minor}) = 15.4$  min,  $t_R(\text{major}) = 21.0$  min.

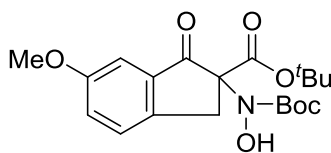

**3f:** Prepared according to general procedure. 38 mg, 88%.  $[\alpha]_D^{22} +143.8$  ( $c = 0.58$ ,  $\text{CHCl}_3$ , 93% ee).  $^1\text{H}$  NMR (400 MHz,  $\text{CDCl}_3$ ):  $\delta = 1.41$  (s, 9 H), 1.42 (s, 9 H), 3.33 (d,  $J = 17.6$  Hz, 1 H), 6.06 (d,  $J = 17.6$  Hz, 1 H), 6.64 (s, 1 H), 7.63 (d,  $J = 8.4$  Hz, 1 H), 7.88 (d,  $J = 8.1$  Hz, 1 H), 8.07 (s, 1 H) ppm.  $^{13}\text{C}$  NMR (100 MHz,  $\text{CDCl}_3$ ):  $\delta = 27.9, 28.2, 37.1, 78.3, 84.0, 84.3, 122.4, 122.6, 122.7, 127.1, 130.7, 131.1, 132.1, 134.6, 155.4, 156.9, 165.2, 193.6$  ppm. HRMS (ESI): Calculated for  $\text{C}_{20}\text{H}_{24}\text{F}_3\text{N}_1\text{Na}_1\text{O}_6$  ( $[\text{M} + \text{Na}]^+$ ) is 454.1448, found 454.1445. HPLC analysis: Daicel Chiralpak AD-H, hexane/*i*-PrOH = 97/3, flow rate = 1.0 mL/min,  $\lambda = 245$  nm, retention time;  $t_R(\text{minor}) = 14.7$  min,  $t_R(\text{major}) = 21.2$  min.

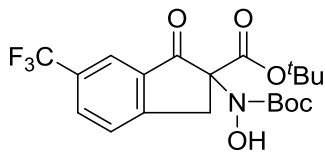

**3g:** Prepared according to general procedure. 36 mg, 95%.  $[\alpha]_D^{23} +117.5$  ( $c = 0.89$ ,  $\text{CHCl}_3$ , 86% ee).  $^1\text{H}$  NMR (400 MHz,  $\text{CDCl}_3$ ):  $\delta = 1.44$  (s, 9 H), 1.51 (s, 9 H), 2.59-2.66 (m, 1 H), 2.85-2.94 (m 2 H), 3.21-3.29 (m, 1 H), 6.23 (s, 1 H), 7.22 (d,  $J = 7.7$  Hz, 1H), 7.29 (t,  $J = 7.4$  Hz, 1H), 7.44-7.48 (m, 1 H), 7.89 (dd,  $J = 7.8, 1.3$  Hz, 1H) ppm.  $^{13}\text{C}$  NMR (100 MHz,  $\text{CDCl}_3$ ):  $\delta = 25.8, 28.1, 28.2, 31.8, 76.9, 83.5, 84.2, 126.7, 128.3, 128.7, 132.4, 133.4, 143.3, 158.6, 168.0, 191.6$  ppm. HRMS (ESI): Calculated for  $\text{C}_{20}\text{H}_{27}\text{N}_1\text{Na}_1\text{O}_6$  ( $[\text{M} + \text{Na}]^+$ ) is 400.1731, found 400.1735. HPLC analysis: Daicel Chiralpak AD-H, hexane/*i*-PrOH = 98/2, flow rate = 1.0 mL/min,  $\lambda = 254$  nm, retention time;  $t_R(\text{major}) = 48.6$  min,  $t_R(\text{minor}) = 54.4$  min.

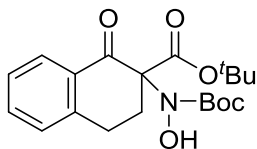

**3h:** Prepared according to general procedure. 31 mg, 95%.  $[\alpha]_D^{23} +215.4$  ( $c = 0.58$ ,  $\text{CHCl}_3$ , 93% ee).  $^1\text{H}$  NMR (400 MHz,  $\text{CDCl}_3$ ):  $\delta = 1.47$  (s, 9 H), 1.51 (s, 9 H), 2.32-2.40 (m, 1 H), 2.45-2.52 (m, 1 H), 2.55-2.64 (m, 1 H), 2.72-2.78 (m, 1 H), 6.03-6.07 (m, 1 H), 6.09 (s, 1 H), 6.86-6.90 (m, 1 H) ppm.  $^{13}\text{C}$  NMR (100 MHz,  $\text{CDCl}_3$ ):  $\delta = 24.1, 28.1, 28.2, 31.2, 76.5, 83.5, 84.1, 128.1, 149.3, 158.4, 167.8, 191.7$  ppm. HRMS (ESI): Calculated for  $\text{C}_{16}\text{H}_{25}\text{N}_1\text{Na}_1\text{O}_6$  ( $[\text{M} + \text{Na}]^+$ ) is 350.1574, found 350.1576. HPLC analysis: Daicel Chiralpak AD-H, hexane/*i*-PrOH = 97/3, flow rate = 1.0 mL/min,  $\lambda = 230$  nm, retention time;  $t_{\text{R}}(\text{minor}) = 20.6$  min,  $t_{\text{R}}(\text{major}) = 23.8$  min.

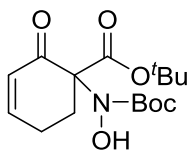

**3i:** Prepared according to general procedure. 33 mg, 97%.  $[\alpha]_D^{23} +120.9$  ( $c = 0.59$ ,  $\text{CHCl}_3$ , 96% ee).  $^1\text{H}$  NMR (400 MHz,  $\text{CDCl}_3$ ):  $\delta = 1.48$  (s, 9 H), 1.49 (s, 9 H), 1.96 (s, 3 H), 2.24-2.30 (m, 1 H), 2.43-2.59 (m, 2 H), 2.71-2.76 (m, 1 H), 5.89 (s, 1 H), 6.13 (s, 1 H) ppm.  $^{13}\text{C}$  NMR (100 MHz,  $\text{CDCl}_3$ ):  $\delta = 24.1, 28.1, 28.2, 29.0, 30.9, 75.9, 83.3, 83.8, 124.7, 158.4, 161.7, 168.0, 191.4$  ppm. HRMS (ESI): Calculated for  $\text{C}_{17}\text{H}_{27}\text{N}_1\text{Na}_1\text{O}_6$  ( $[\text{M} + \text{Na}]^+$ ) is 364.1731, found 364.1732. HPLC analysis: Daicel Chiralpak AD-H, hexane/*i*-PrOH = 97/3, flow rate = 1.0 mL/min,  $\lambda = 230$  nm, retention time;  $t_{\text{R}}(\text{minor}) = 19.5$  min,  $t_{\text{R}}(\text{major}) = 24.1$  min.

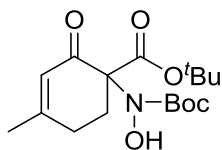

**3j:** Prepared according to general procedure. 36 mg, 97%.  $[\alpha]_D^{24} +242.5$  ( $c = 0.70$ ,  $\text{CHCl}_3$ , 96% ee).  $^1\text{H}$  NMR (400 MHz,  $\text{CDCl}_3$ ):  $\delta = 1.36$  (t,  $J = 7.0$  Hz, 3 H), 1.49 (s, 9 H), 1.50 (s, 9 H), 2.40-2.52 (m, 2 H), 2.60-2.68 (m, 1 H), 2.73-2.79 (m, 1 H), 3.89-3.95 (m, 2 H), 5.34 (s, 1 H), 6.16 (s, 1 H) ppm.  $^{13}\text{C}$  NMR (100 MHz,  $\text{CDCl}_3$ ):  $\delta = 14.3, 26.7, 28.1, 28.2, 29.1, 64.8, 76.1, 83.3, 83.5, 101.0, 158.3, 167.9, 177.1, 191.6$  ppm. HRMS (ESI): Calculated for  $\text{C}_{18}\text{H}_{29}\text{N}_1\text{Na}_1\text{O}_7$  ( $[\text{M} + \text{Na}]^+$ ) is 394.1836, found 394.1841. HPLC analysis: Daicel Chiralpak AD-H, hexane/*i*-PrOH = 97/3, flow rate = 1.0 mL/min,  $\lambda = 230$  nm, retention time;  $t_{\text{R}}(\text{minor}) = 32.2$  min,  $t_{\text{R}}(\text{major}) = 41.5$  min.

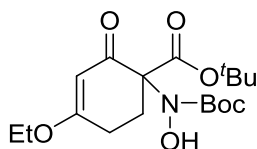

**3k:** Prepared according to general procedure. 27 mg, 83%.  $[\alpha]_D^{23} +113.4$  ( $c = 0.37$ ,  $\text{CHCl}_3$ , 93% ee).  $^1\text{H}$  NMR (400 MHz,  $\text{CDCl}_3$ ):  $\delta = 1.45$  (s, 9 H), 1.48 (s, 9 H), 2.19 (s, 3 H), 2.75 (d,  $J = 17.5$  Hz, 1 H), 3.44 (d,  $J = 17.5$  Hz, 1 H), 5.91-5.92 (m, 1 H), 6.44 (s, 1 H) ppm.  $^{13}\text{C}$  NMR (100 MHz,  $\text{CDCl}_3$ ):  $\delta = 19.8, 27.9, 28.3, 43.2, 77.1, 83.3, 83.4, 127.2, 157.1, 165.7, 178.8, 197.4$  ppm. HRMS (ESI): Calculated for  $\text{C}_{16}\text{H}_{25}\text{N}_1\text{Na}_1\text{O}_6$  ( $[\text{M} + \text{Na}]^+$ ) is 350.1574, found 350.1578. HPLC analysis: Daicel Chiralpak AD-H, hexane/*i*-PrOH = 97/3, flow rate = 1.0 mL/min,  $\lambda = 230$  nm, retention time;  $t_{\text{R}}(\text{minor}) = 16.0$  min,  $t_{\text{R}}(\text{major}) = 20.3$  min.

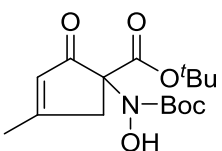

**3l:** Prepared according to general procedure. 30 mg, 92%.  $[\alpha]_D^{25} -29.3$  ( $c = 0.36$ ,  $\text{CHCl}_3$ , 95% ee).  $^1\text{H}$  NMR (400 MHz,  $\text{CDCl}_3$ ):  $\delta = 1.45$  (s, 9 H), 1.47 (s, 9 H), 1.82 (q,  $J = 1.9$  Hz, 3 H), 2.73 (dp,  $J = 18.5, 2.4$  Hz, 1 H), 3.38-3.45 (m, 1 H), 6.51 (s, 1 H), 7.39-7.41 (m, 1 H) ppm.  $^{13}\text{C}$  NMR (100 MHz,  $\text{CDCl}_3$ ):  $\delta = 10.9, 27.9, 28.3, 37.7, 75.5, 83.3, 83.5, 139.0, 157.0, 157.3, 165.8, 198.0$  ppm. HRMS (ESI): Calculated for  $\text{C}_{16}\text{H}_{25}\text{N}_1\text{Na}_1\text{O}_6$  ( $[\text{M} + \text{Na}]^+$ ) is 350.1574, found 350.1573. HPLC analysis: Daicel Chiralpak AD-H, hexane/*i*-PrOH = 97/3, flow rate = 1.0 mL/min,  $\lambda = 230$  nm, retention time;  $t_{\text{R}}(\text{minor}) = 22.2$  min,  $t_{\text{R}}(\text{major}) = 25.0$  min.

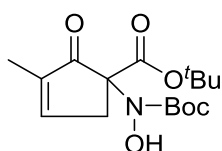

**3m**: Prepared according to general procedure. 29 mg, 92%.  $[\alpha]_D^{22} + 108.0$  ( $c = 0.27$ ,  $\text{CHCl}_3$ , 85% ee).  $^1\text{H}$  NMR (400 MHz,  $\text{CDCl}_3$ ):  $\delta = 1.48$  (s, 9 H), 1.48 (s, 9 H), 1.96-2.15 (m, 2 H), 2.31-2.62 (m, 4 H), 6.34 (s, 1 H) ppm.  $^{13}\text{C}$  NMR (100 MHz,  $\text{CDCl}_3$ ):  $\delta = 18.5, 28.0, 28.3, 32.6, 36.2, 77.7, 83.6, 83.7, 157.2, 167.5, 206.5$  ppm. HRMS (ESI): Calculated for  $\text{C}_{15}\text{H}_{25}\text{N}_1\text{Na}_1\text{O}_6$  ( $[\text{M} + \text{Na}]^+$ ) is 338.1574, found 338.1573. HPLC analysis: Daicel Chiralpak OD-H, hexane/*i*-PrOH = 99/1, flow rate = 1.0 mL/min,  $\lambda = 210$  nm, retention time;  $t_{\text{R}}(\text{minor}) = 10.3$  min,  $t_{\text{R}}(\text{major}) = 11.4$  min.

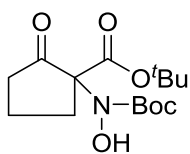

**3n**: Prepared according to general procedure. 27 mg, 89%.  $[\alpha]_D^{23} + 99.8$  ( $c = 0.42$ ,  $\text{CHCl}_3$ , 94% ee).  $^1\text{H}$  NMR (400 MHz,  $\text{CDCl}_3$ ):  $\delta = 1.48$  (s, 9 H), 1.50 (s, 9 H), 1.68 (s, 3 H), 2.28 (s, 1 H), 6.30 (s, 1 H), ppm.  $^{13}\text{C}$  NMR (100 MHz,  $\text{CDCl}_3$ ):  $\delta = 19.2, 25.5, 28.0, 28.2, 78.9, 83.5, 84.4, 158.0, 168.2, 200.0$  ppm. HRMS (ESI): Calculated for  $\text{C}_{14}\text{H}_{25}\text{N}_1\text{Na}_1\text{O}_6$  ( $[\text{M} + \text{Na}]^+$ ) is 326.1574, found 326.1576. HPLC analysis: Daicel Chiralpak OD-H, hexane/*i*-PrOH = 99/1, flow rate = 1.0 mL/min,  $\lambda = 210$  nm, retention time;  $t_{\text{R}}(\text{minor}) = 10.3$  min,  $t_{\text{R}}(\text{major}) = 11.3$  min.

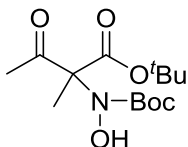

**3o**: Prepared according to general procedure. 36 mg, 95%.  $[\alpha]_D^{23} + 82.0$  ( $c = 0.70$ ,  $\text{CHCl}_3$ , 93% ee).  $^1\text{H}$  NMR (400 MHz,  $\text{CDCl}_3$ ):  $\delta = 1.34$  (s, 9 H), 1.47 (s, 9 H), 2.10 (s, 3 H), 3.44 (d,  $J = 14.2$  Hz, 1 H), 3.57 (d,  $J = 14.2$  Hz, 1 H), 6.44 (s, 1 H), 7.18-7.27 (m, 3 H), 7.38-7.40 (m, 2 H) ppm.  $^{13}\text{C}$  NMR (100 MHz,  $\text{CDCl}_3$ ):  $\delta = 26.7, 27.9, 28.1, 36.8, 82.6, 83.6, 84.3, 127.1, 128.3, 131.3, 135.8, 156.4, 167.2, 197.4$  ppm. HRMS (ESI): Calculated for  $\text{C}_{20}\text{H}_{29}\text{N}_1\text{Na}_1\text{O}_6$  ( $[\text{M} + \text{Na}]^+$ ) is 402.1887, found 402.1883. HPLC analysis: Daicel Chiralpak AD-H, hexane/*i*-PrOH = 99/1, flow rate = 1.0 mL/min,  $\lambda = 210$  nm, retention time;  $t_{\text{R}}(\text{minor}) = 30.5$  min,  $t_{\text{R}}(\text{major}) = 38.0$  min.

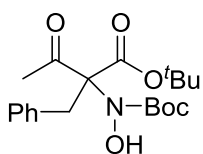

**3p**: Prepared according to general procedure. 29 mg, 88%.  $[\alpha]_D^{22} - 47.0$  ( $c = 0.43$ ,  $\text{CHCl}_3$ , 94% ee).  $^1\text{H}$  NMR (400 MHz,  $\text{CDCl}_3$ ):  $\delta = 1.48$  (s, 9 H), 1.49 (s, 9 H), 2.24 (s, 3 H), 2.86-2.96 (m, 2 H), 5.08-5.18 (m, 2 H), 5.93-6.04 (m, 1 H), 6.36 (s, 1 H) ppm.  $^{13}\text{C}$  NMR (100 MHz,  $\text{CDCl}_3$ ):  $\delta = 26.9, 28.0, 28.2, 37.8, 81.5, 84.0, 84.1, 119.1, 133.5, 157.5, 167.5, 198.6$  ppm. HRMS (ESI): Calculated for  $\text{C}_{16}\text{H}_{27}\text{N}_1\text{Na}_1\text{O}_6$  ( $[\text{M} + \text{Na}]^+$ ) is 352.1731, found 352.1732. HPLC analysis: Daicel Chiralpak AD-H, hexane/*i*-PrOH = 99/1, flow rate = 1.0 mL/min,  $\lambda = 210$  nm, retention time;  $t_{\text{R}}(\text{minor}) = 25.0$  min,  $t_{\text{R}}(\text{major}) = 27.8$  min.

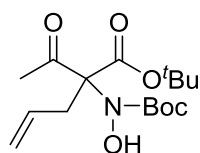

**3q**: Prepared according to general procedure. 27 mg, 82%.  $[\alpha]_D^{25} + 22.7$  ( $c = 0.44$ ,  $\text{CHCl}_3$ , 94% ee).  $^1\text{H}$  NMR (400 MHz,  $\text{CDCl}_3$ ):  $\delta = 1.50$  (s, 9 H), 1.50 (s, 9 H), 2.10 (t,  $J = 2.7$  Hz, 1 H), 2.37 (s, 3 H), 3.03-3.12 (m, 2 H), 6.35 (s, 1 H) ppm.  $^{13}\text{C}$  NMR (100 MHz,  $\text{CDCl}_3$ ):  $\delta = 23.4, 26.7, 28.0, 28.2, 71.8, 79.5, 80.0, 84.4, 157.2, 166.2, 198.3$  ppm. HRMS (ESI): Calculated for  $\text{C}_{16}\text{H}_{25}\text{N}_1\text{Na}_1\text{O}_6$  ( $[\text{M} + \text{Na}]^+$ ) is 350.1574, found 350.1571. HPLC analysis: Daicel Chiralpak AS-H, hexane/*i*-PrOH = 99/1, flow rate = 1.0 mL/min,  $\lambda = 210$  nm, retention time;  $t_{\text{R}}(\text{major}) = 11.9$  min,  $t_{\text{R}}(\text{minor}) = 15.4$  min.

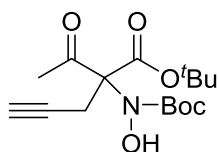

**3r**: Prepared according to general procedure. 30 mg, 82%.  $[\alpha]_D^{23} + 34.7$  ( $c = 0.40$ ,  $\text{CHCl}_3$ , 86% ee).  $^1\text{H}$  NMR (400 MHz,  $\text{CDCl}_3$ ):  $\delta = 1.27$  (s, 9 H), 1.47 (s, 9 H), 1.85 (s, 3 H), 6.70 (s, 1 H), 7.42 (t,  $J = 7.7$  Hz, 2 H), 7.53 (t,  $J = 7.4$  Hz, 2 H), 8.20 (t,  $J = 7.3$  Hz, 2 H) ppm.  $^{13}\text{C}$  NMR (100 MHz,  $\text{CDCl}_3$ ):  $\delta = 20.5, 27.9, 28.0, 78.6, 83.7, 84.8, 128.4, 129.8, 133.0, 135.1, 157.8, 168.8, 191.4$  ppm. HRMS (ESI): Calculated for  $\text{C}_{19}\text{H}_{27}\text{N}_1\text{Na}_1\text{O}_6$  ( $[\text{M} + \text{Na}]^+$ ) is 388.1731, found 388.1734. HPLC analysis: Daicel Chiralpak AD-H, hexane/*i*-PrOH = 97/3, flow rate = 1.0 mL/min,  $\lambda = 230$  nm, retention time;  $t_{\text{R}}(\text{minor}) = 14.9$  min,  $t_{\text{R}}(\text{major}) = 18.8$  min.

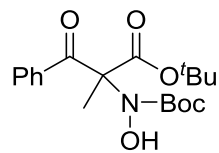

**3s:** Prepared according to general procedure. 35 mg, 89%.  $[\alpha]_D^{24} - 51.7$  ( $c = 0.42$ ,  $\text{CHCl}_3$ , 87% ee).  $^1\text{H}$  NMR (400 MHz,  $\text{CDCl}_3$ ):  $\delta = 1.14$  (s, 9 H), 1.50 (s, 9 H), 1.75 (s, 3 H), 6.49 (s, 1 H), 7.17 (d,  $J = 16.0$  Hz, 1 H), 7.38-7.41 (m, 3 H), 7.56-7.58 (m, 2 H), 7.71 (d,  $J = 16.0$  Hz, 1 H) ppm.  $^{13}\text{C}$  NMR (100 MHz,  $\text{CDCl}_3$ ):  $\delta = 19.0$ , 28.1, 78.3, 83.6, 84.7, 121.5, 128.6, 129.1, 130.7, 134.8, 143.2, 158.0, 168.0, 191.2 ppm. HRMS (ESI): Calculated for  $\text{C}_{21}\text{H}_{29}\text{N}_1\text{Na}_1\text{O}_6$  ( $[\text{M} + \text{Na}]^+$ ) is 414.1887, found 414.1882. HPLC analysis: Daicel Chiralpak AS-H, hexane/*i*-PrOH = 97/3, flow rate = 1.0 mL/min,  $\lambda = 290$  nm, retention time;  $t_R(\text{major}) = 12.5$  min,  $t_R(\text{minor}) = 17.2$  min.

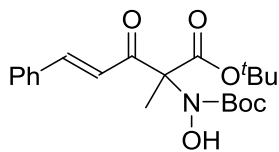

**3t:** Prepared according to general procedure. 37 mg, 89%.  $[\alpha]_D^{24} + 35.1$  ( $c = 0.60$ ,  $\text{CHCl}_3$ , 95% ee).  $^1\text{H}$  NMR (400 MHz,  $\text{CDCl}_3$ ):  $\delta = 1.35$  (s, 9 H), 3.28 (d,  $J = 17.3$  Hz, 1 H), 3.97 (d,  $J = 17.3$  Hz, 1 H), 5.13-5.19 (m, 2H), 6.92 (s, 1 H), 7.05-7.13 (m, 2 H), 7.31-7.37 (m, 5 H), 7.78 (dd,  $J = 8.4$ , 5.3 Hz, 1H) ppm.  $^{13}\text{C}$  NMR (100 MHz,  $\text{CDCl}_3$ ):  $\delta = 27.8$ , 36.8, 68.8, 78.4, 84.3, 113.2 (d,  $J = 22.7$  Hz), 116.5 (d,  $J = 23.9$  Hz), 127.9 (d,  $J = 10.6$  Hz), 128.5, 128.6, 128.7, 155.3 (d,  $J = 10.6$  Hz), 157.8, 165.2, 166.5, 169.1, 192.7 ppm. HRMS (ESI): Calculated for  $\text{C}_{22}\text{H}_{22}\text{F}_1\text{N}_1\text{Na}_1\text{O}_6$  ( $[\text{M} + \text{Na}]^+$ ) is 438.1323, found 438.1323. HPLC analysis: Daicel Chiralpak AD-H, hexane/*i*-PrOH = 96/4, flow rate = 1.0 mL/min,  $\lambda = 240$  nm, retention time;  $t_R(\text{minor}) = 40.8$  min,  $t_R(\text{major}) = 44.2$  min.

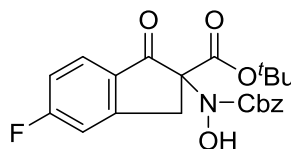

**3u:** Prepared according to general procedure. 35 mg, 93%.  $[\alpha]_D^{25} + 59.2$  ( $c = 0.45$ ,  $\text{CHCl}_3$ , 93% ee).  $^1\text{H}$  NMR (400 MHz,  $\text{CDCl}_3$ ):  $\delta = 1.43$  (s, 9 H), 1.95 (s, 3 H), 2.29-2.36 (m, 1 H), 2.44-2.53 (m, 2 H), 2.76-2.83 (m, 1 H), 5.21 (s, 2 H), 5.92-5.93 (m, 1 H), 6.16 (s, 1 H) ppm.  $^{13}\text{C}$  NMR (100 MHz,  $\text{CDCl}_3$ ):  $\delta = 24.2$ , 28.0, 29.0, 30.5, 68.7, 76.0, 83.7, 124.9, 128.5, 128.7, 135.5, 159.1, 162.4, 167.6, 191.1 ppm. HRMS (ESI): Calculated for  $\text{C}_{20}\text{H}_{25}\text{N}_1\text{Na}_1\text{O}_6$  ( $[\text{M} + \text{Na}]^+$ ) is 398.1574, found 398.1573. HPLC analysis: Daicel Chiralpak AD-H, hexane/*i*-PrOH = 95/5, flow rate = 1.0 mL/min,  $\lambda = 230$  nm, retention time;  $t_R(\text{major}) = 37.7$  min,  $t_R(\text{minor}) = 43.0$  min.

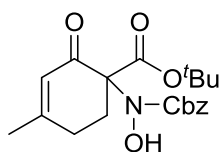

### 3. Synthesis of compound 4c.

To a 10 mL round bottom flask equipped with a magnetic stir bar and a rubber septum was added Pd-C (7.5 mg) and the flask was evacuated before purged with hydrogen using a balloon. Then a MeOH (2 mL) solution of **3c** (36.3 mg, 0.100 mmol) was added and the mixture was stirred and the progress of the reaction was monitored by TLC. After complete consumption of **3c** (4h) the mixture was filtered over celite. The residue was purified by silica gel column chromatography using *n*-hexane/ethyl acetate (3:1 to 2:1) as eluent. 34 mg, 93%.  $[\alpha]_D^{25} + 68.6$  ( $c = 0.58$ ,  $\text{CHCl}_3$ , 95% ee).  $^1\text{H}$  NMR (400 MHz,  $\text{CDCl}_3$ ):  $\delta = 1.24$  (s, 9 H), 1.57 (s, 9 H), 3.37 (d,  $J = 16.3$  Hz, 1H), 3.51 (d,  $J = 16.4$  Hz, 1H), 3.95 (brs, 1 H), 5.79 (d,  $J = 3.6$  Hz, 1H), 6.31 (s, 1 H), 7.13-7.15 (m 1 H), 7.21-2.24 (m, 2 H), 7.35-7.37 (m, 1 H) ppm.  $^{13}\text{C}$  NMR (100 MHz,  $\text{CDCl}_3$ ):  $\delta = 27.9$ , 28.4, 42.4, 81.7, 81.8, 82.7, 83.7, 123.5, 123.8, 126.9, 128.1, 139.5, 141.5, 159.1, 169.9 ppm. HRMS (ESI): Calculated for  $\text{C}_{19}\text{H}_{27}\text{N}_1\text{Na}_1\text{O}_6$  ( $[\text{M} + \text{Na}]^+$ ) is 388.1731, found 388.1728. HPLC analysis: Daicel Chiralpak AD-H, hexane/*i*-PrOH = 94/6, flow rate = 1.0 mL/min,  $\lambda = 215$  nm, retention time;  $t_R(\text{minor}) = 13.7$  min,  $t_R(\text{major}) = 24.2$  min.

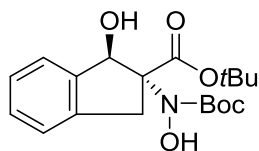



#### 4. Synthesis of compound 5c.

A two necked Schlenk flask (10 mL) equipped with a reflux condenser and a magnetic stir bar was added **3c** (36.3 mg, 0.100 mmol) and Mo(CO)<sub>6</sub> (39.9 mg, 0.150 mmol). The whole system was purged with nitrogen. A mixture of CH<sub>3</sub>CN-distilled H<sub>2</sub>O (2 mL, 9: 1 v/v) was then added and the mixture was then heated at 80 °C. The reaction was monitored by TLC and after complete consumption of **3c** (12 h) the

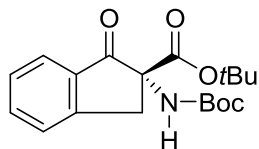

mixture was cooled to room temperature and diluted with CH<sub>2</sub>Cl<sub>2</sub> (5 mL) and filtered after drying with anhydrous Na<sub>2</sub>SO<sub>4</sub> and concentrated in vacuum. The crude product was then purified by silica gel flash chromatography using 2 : 3 EtOAc/*n*-hexane as eluent to obtain **5c-Boc** (25.4 mg, 73%).  $[\alpha]_D^{23} +81.4$  (*c* = 0.29, CHCl<sub>3</sub>, 95% ee). <sup>1</sup>H NMR (400 MHz, CDCl<sub>3</sub>): δ = 1.29 (s, 9 H), 1.43 (s, 9 H), 3.51 (d, *J* = 16.1 Hz, 1 H), 3.67 (d, *J* = 16.8 Hz, 1H), 5.98 (s, 1H), 7.38 (t, *J* = 7.5 Hz, 1H), 7.46 (d, *J* = 7.6 Hz, 1H), 7.62 (t, *J* = 7.3 Hz, 1H), 7.79 (d, *J* = 7.7 Hz, 1H)ppm. HRMS (ESI): Calculated for C<sub>19</sub>H<sub>25</sub>N<sub>1</sub>Na<sub>1</sub>O<sub>5</sub> ([M + Na]<sup>+</sup>) is 370.1625, found 370.1621. HPLC analysis: Daicel Chiralpak AD-H, hexane/*i*-PrOH = 99/1, flow rate = 1.0 mL/min, λ = 215 nm, retention time; t<sub>R</sub>(minor) = 21.6 min, t<sub>R</sub>(major) = 26.2 min.

To an oven dried one necked round bottom flask (5 mL) equipped with a magnetic stir bar was added **3c-Boc** (35 mg, 0.10 mmol). The flask was then purged with nitrogen and dry CH<sub>2</sub>Cl<sub>2</sub> (1 mL) was then added and the white suspension was the placed into an ice bath. Trifluoroacetic acid (92 μL, 136 mg, 1.2 mmol) was added with gentle stirring. The mixture was allowed to stir at 0 °C. After complete consumption of **3c-Boc** (monitored by TLC, 3 h) the reaction was quenched with saturated NH<sub>4</sub>Cl (0.2 mL) and the organics were extracted in CH<sub>2</sub>Cl<sub>2</sub> (5 × 2 mL). Combined organic layer was dried over anhydrous Na<sub>2</sub>SO<sub>4</sub>, concentrated in vacuo, and the residue was purified by silica gel flash chromatography using 1:1 *n*-hexane/ethyl acetate as eluent to obtain **3c** (23.7 mg, 96%). <sup>1</sup>H and <sup>13</sup>C NMR

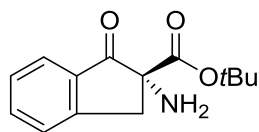

data match with those reported in the literature.<sup>S9</sup>  $[\alpha]_D^{24} +13.9$  (*c* = 0.9, CHCl<sub>3</sub>, 95% ee). <sup>1</sup>H NMR (400 MHz, CDCl<sub>3</sub>): δ = 1.34 (s, 9 H), 1.94 (brs, 2 H), 3.06 (d, *J* = 16.9 Hz, 1H), 3.64 (d, *J* = 17.0 Hz, 1H), 7.41 (t, *J* = 7.5 Hz, 1H), 7.47 (d, *J* = 7.7 Hz, 1H), 7.61-7.65 (m, 1 H), 7.79 (d, *J* = 7.7 Hz, 1H)ppm. HPLC analysis: Daicel

Chiralpak AD-H, hexane/*i*-PrOH = 94/6, flow rate = 1.0 mL/min, λ = 240 nm, retention time; t<sub>R</sub>(major) = 14.7 min, t<sub>R</sub>(minor) = 17.3 min.

#### 5. Synthesis of compound 6c.

To a 5 mL round bottom flask equipped with a magnetic stir bar and a rubber septum was added Pd-C (5 mg) and the flask was evacuated before purged with hydrogen using a balloon. Then a MeOH (1 mL) solution of **5c** (24.7 mg, 0.100 mmol) was added and the mixture was stirred overnight. After complete consumption of **5c** (monitored by TLC) the mixture was filtered over a short plug

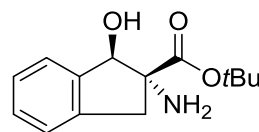

of silica gel and celite, wash with methanol. The residue was then concentrated to obtain **6c** (24.4 mg, 98%) as single diastereomer. <sup>1</sup>H and <sup>13</sup>C NMR data match with those reported in the literature.<sup>S9</sup>  $[\alpha]_D^{25} +43.6$  (*c* = 0.85, CHCl<sub>3</sub>). <sup>1</sup>H NMR (400 MHz, CDCl<sub>3</sub>): δ = 1.45 (s, 9 H), 2.03 (brs, 2 H), 2.82 (d, *J* = 16.2 Hz, 1H), 3.60 (d, *J* = 16.2 Hz, 1H), 4.90 (s, 1 H), 7.20-7.29 (m, 3 H), 7.39-7.41 (m, 1 H)ppm.



## 6. References

- S1 M. V. Vita, J. Waser, *Org. Lett.*, 2013, **15**, 3246.
- S2 D. Lim, F. Fang, G. Zhou, D. M. Coltart, *Org. Lett.*, 2007, **9**, 4139.
- S3 T. A. Moss, D. R. Fenwick, D. J. Dixon, *J. Am. Chem. Soc.*, 2008, **130**, 10076.
- S4 M. Capuzzi, D. Perdicchia, K. A. Jørgensen, *Chem. Eur. J.* 2007, **14**, 128.
- S5 E. Abraham et al. *Tetrahedron: Asymmetry*, 2011, **22**, 69.
- S6 D. Kalaitzakis, S. Kambourakis, J. D. Rozzell, I. Smonou, *Tetrahedron: Asymmetry*, 2007, **18**, 2418.
- S7 J. A. Turner, W. S. Jacks, *J. Org. Chem.*, 1989, **54**, 4229.
- S8 Z. Yu, X. Liu, Z. Dong, M. Xie, X. Feng, *Angew. Chem., Int. Ed.*, 2008, **47**, 1308.
- S9 K. Shibatomi, Y. Soga, A. Narayama, I. Fujisawa, S. Iwasa, *J. Am. Chem. Soc.*, 2012, **134**, 9836.

## 7. Copies of $^1\text{H}$ and $^{13}\text{C}$ NMR spectra

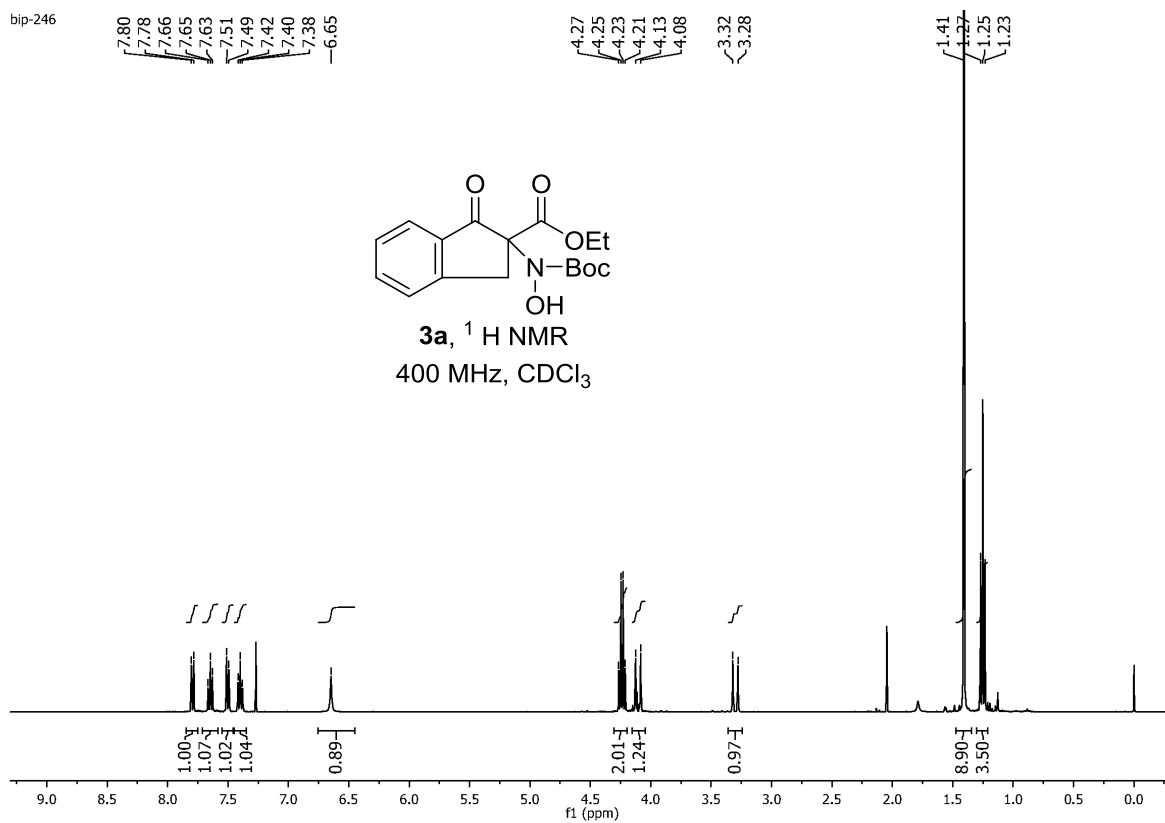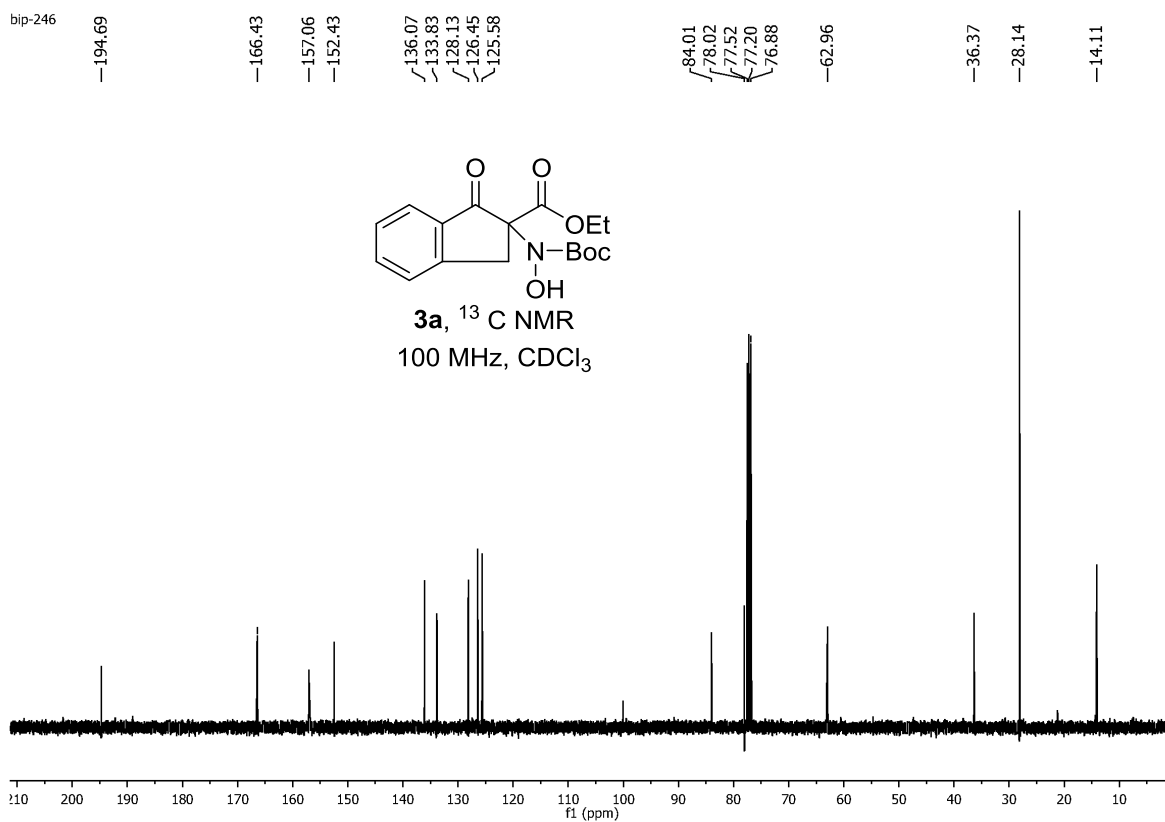



bip-189

7.80  
7.78  
7.65  
7.63  
7.61  
7.49  
7.47  
7.41  
7.39  
7.37  
6.69

4.03  
3.99

3.31  
3.26

1.49

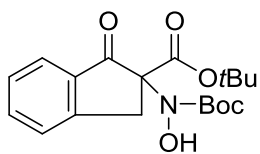

**3c**,  $^1\text{H}$  NMR  
400 MHz,  $\text{CDCl}_3$

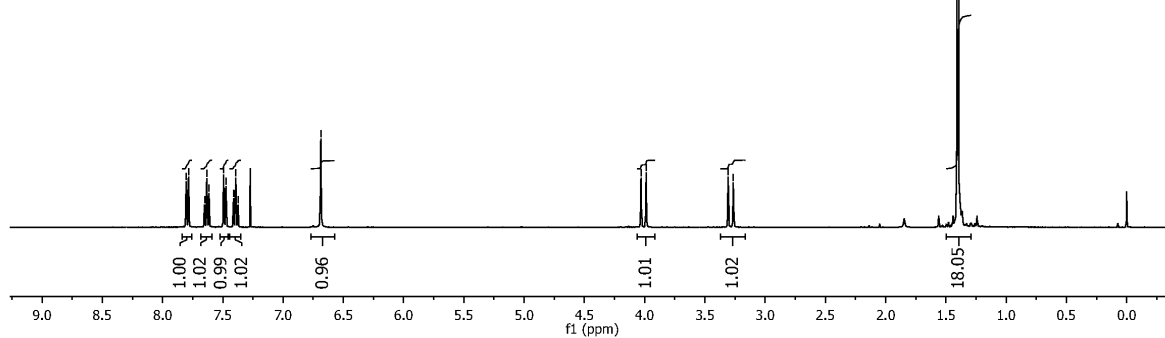

bip-189

194.93

165.69

156.87

152.41

135.78

134.13

127.96

126.28

125.44

83.74

83.64

78.29

37.06

28.16

27.86

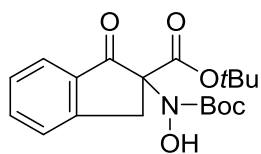

**3c**,  $^{13}\text{C}$  NMR  
100 MHz,  $\text{CDCl}_3$

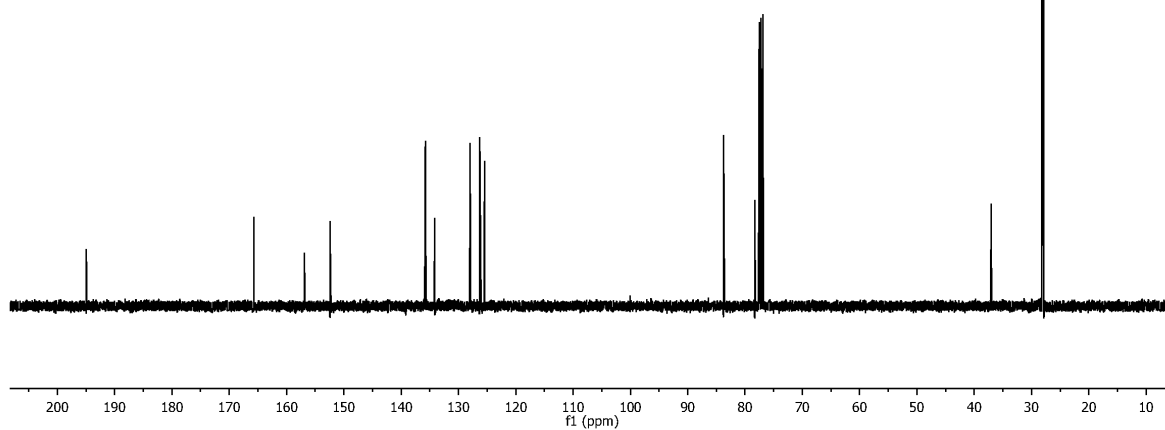

bip-201

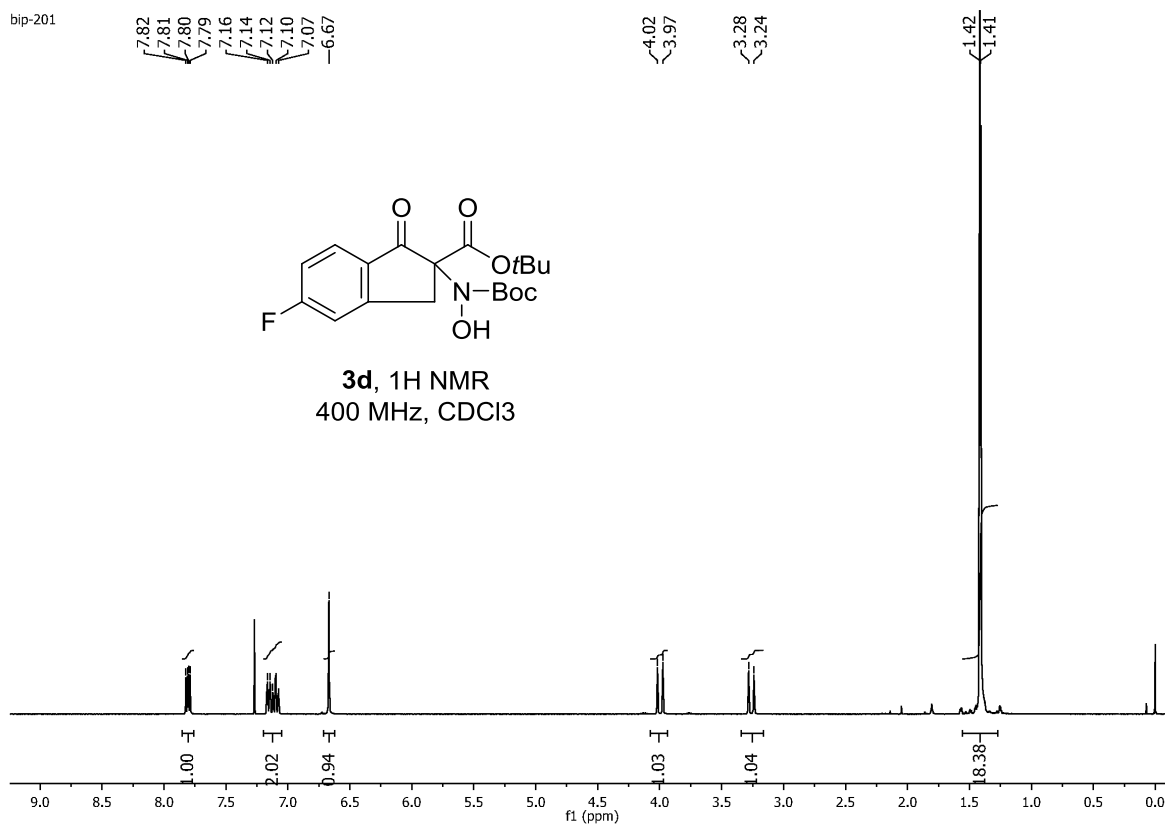

bip-201

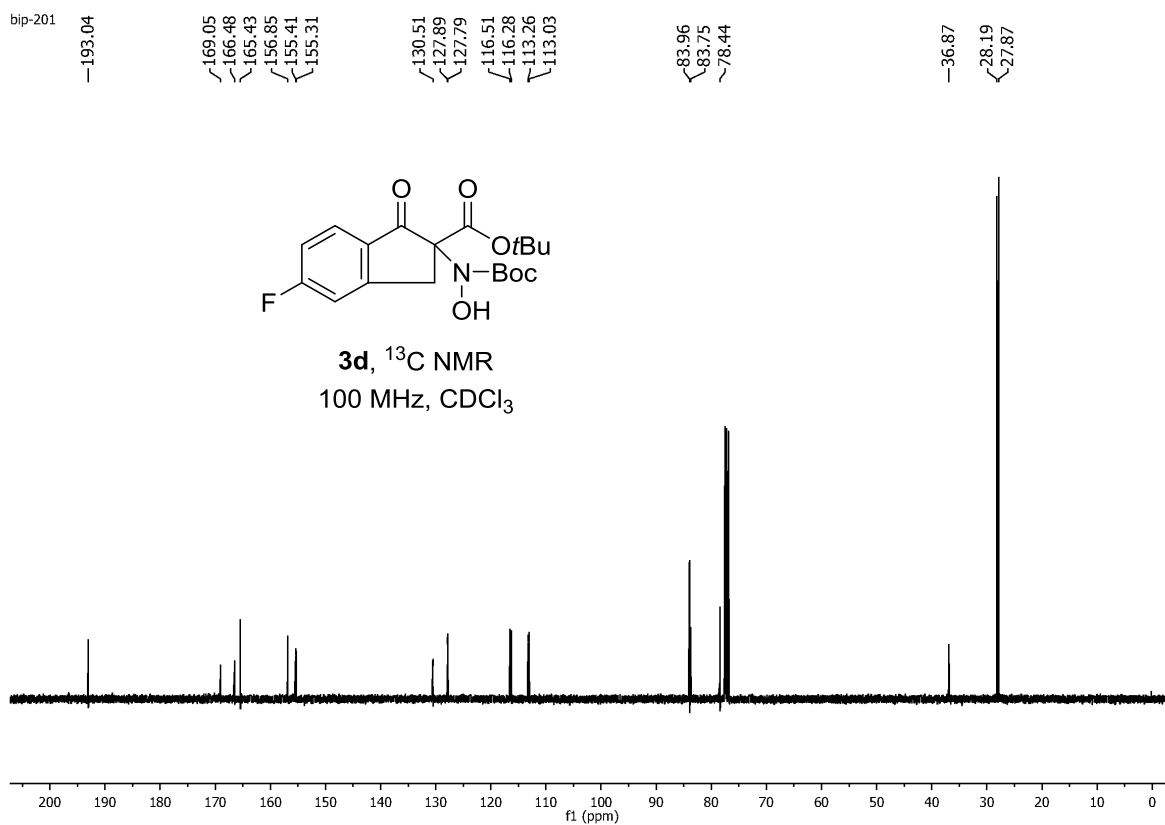

bip-202

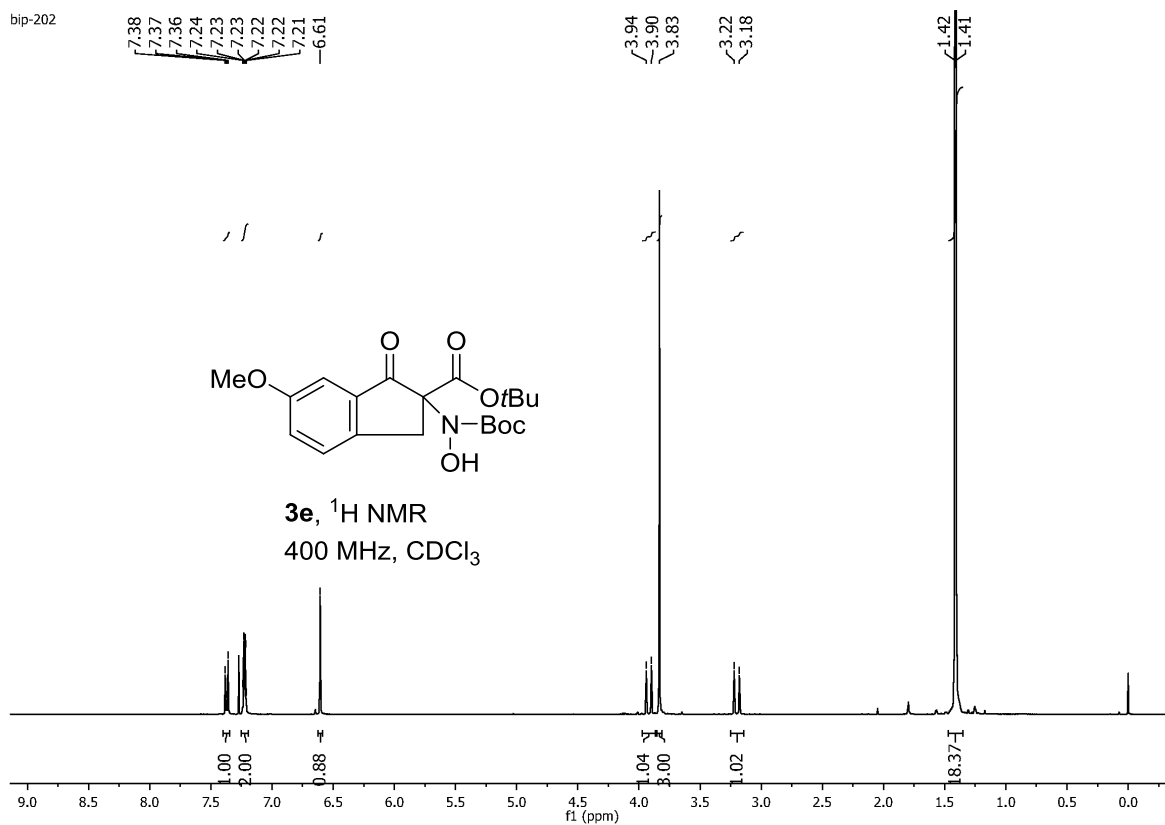

bip-202

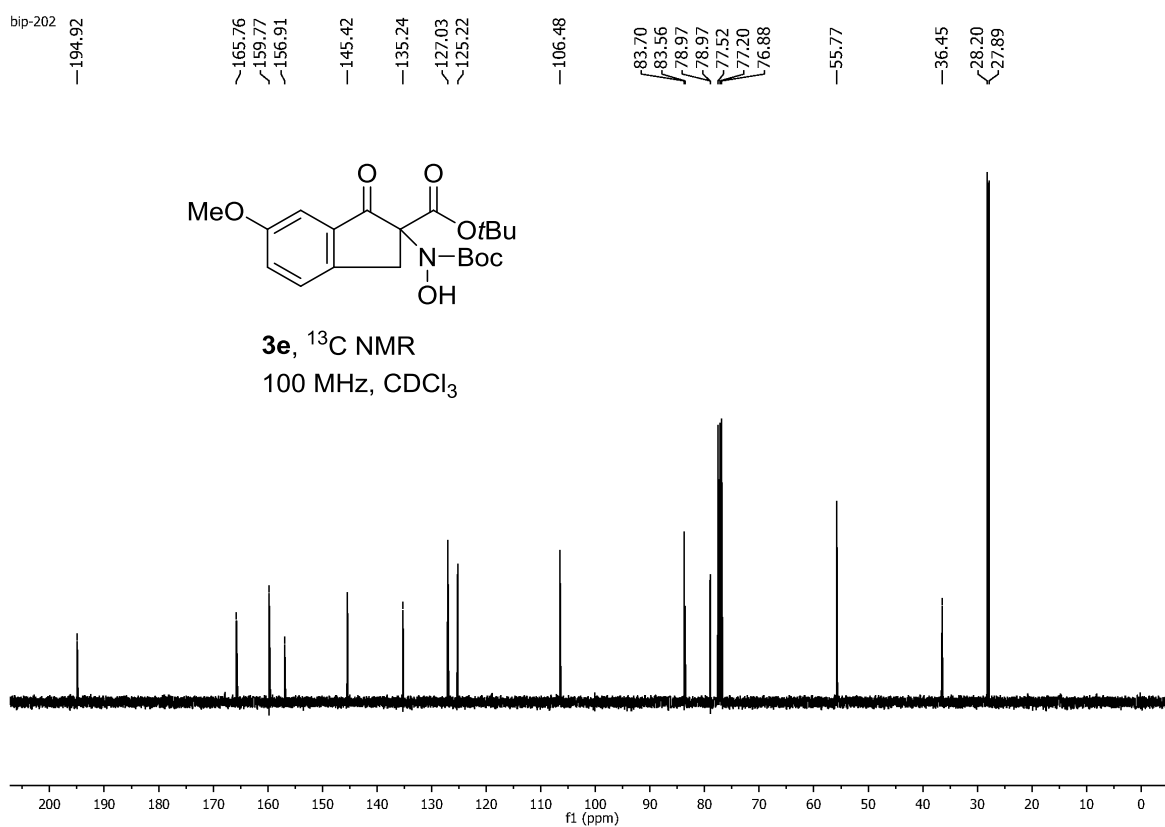



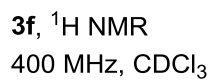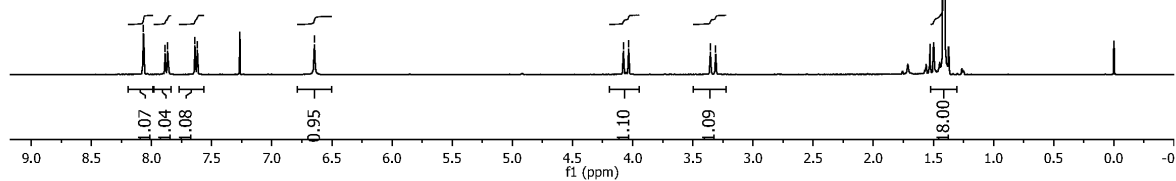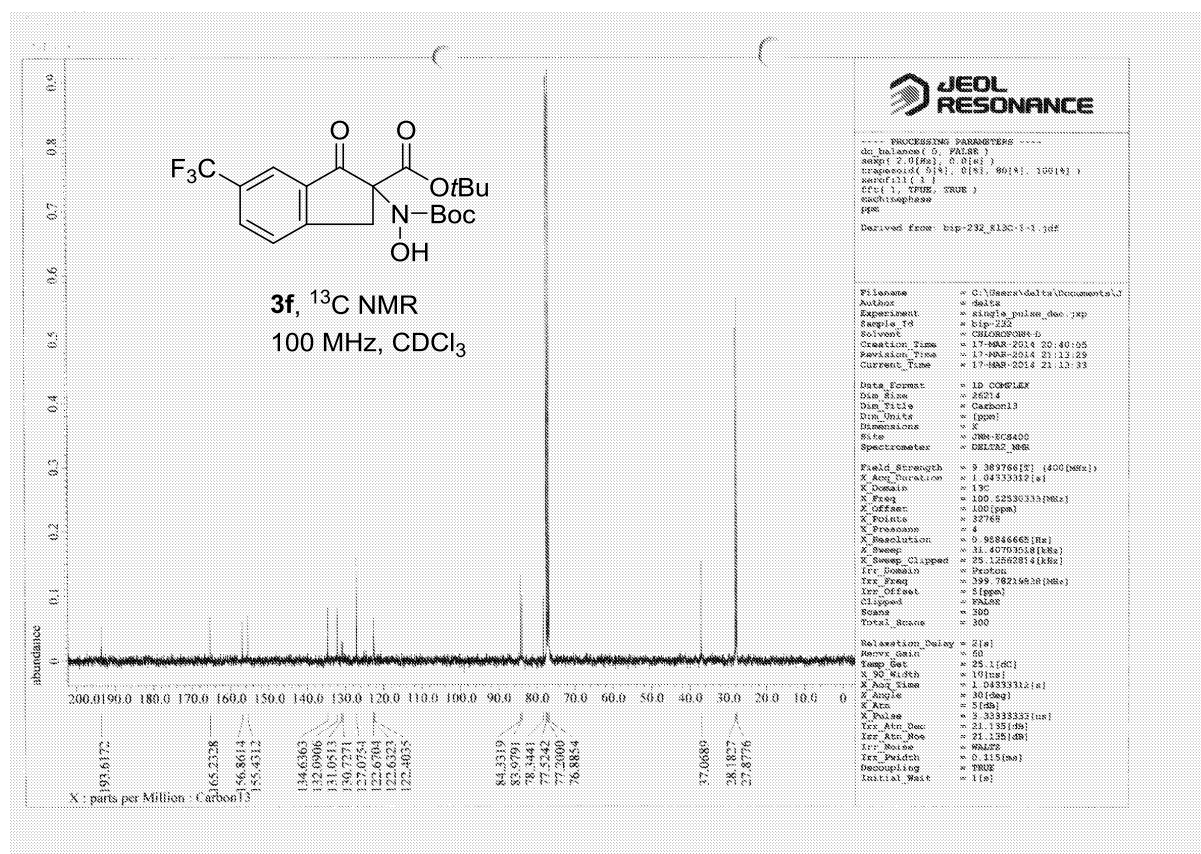

bip-195

7.90  
7.90  
7.88  
7.88  
7.48  
7.48  
7.47  
7.46  
7.45  
7.44  
7.31  
7.29  
7.27  
7.23  
7.21  
6.23

3.29  
3.28  
3.27  
3.25  
3.24  
3.22  
3.21  
2.94  
2.93  
2.92  
2.90  
2.88  
2.86  
2.85  
2.66  
2.65  
2.64  
2.62  
2.61  
2.60  
2.59  
1.51  
1.44

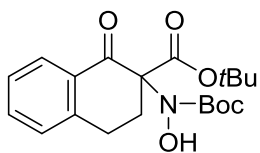

**3g**,  $^1\text{H}$  NMR  
400 MHz,  $\text{CDCl}_3$

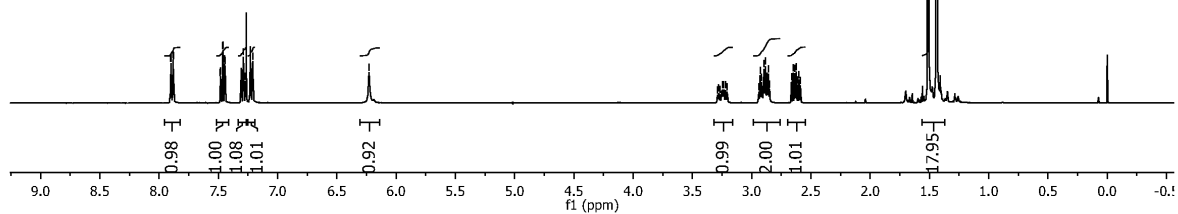

bip-195

191.63  
167.96  
158.64  
143.26  
133.43  
132.43  
128.71  
128.27  
126.72

84.20  
83.53  
77.52  
77.20  
76.88  
76.85

31.79  
28.18  
28.12  
25.78

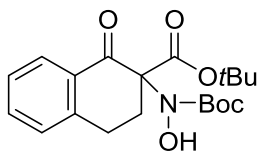

**3g**,  $^{13}\text{C}$  NMR  
100 MHz,  $\text{CDCl}_3$

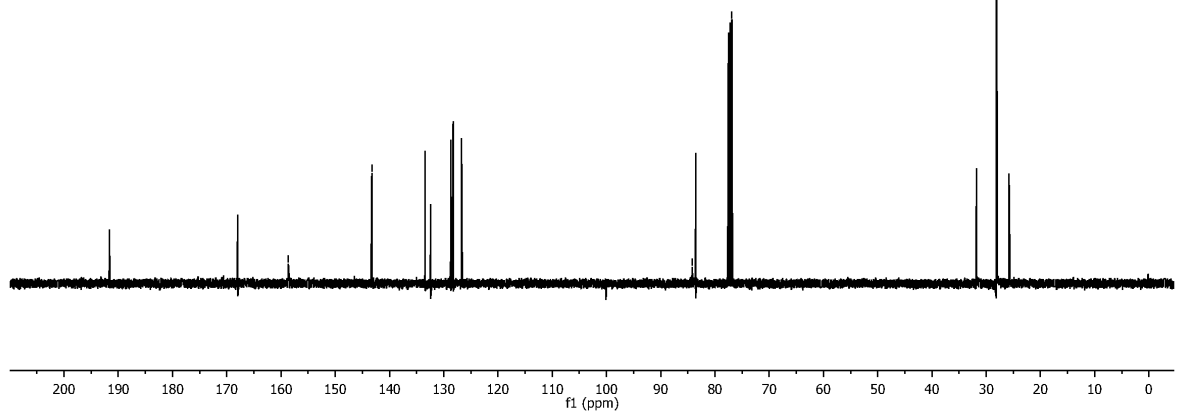

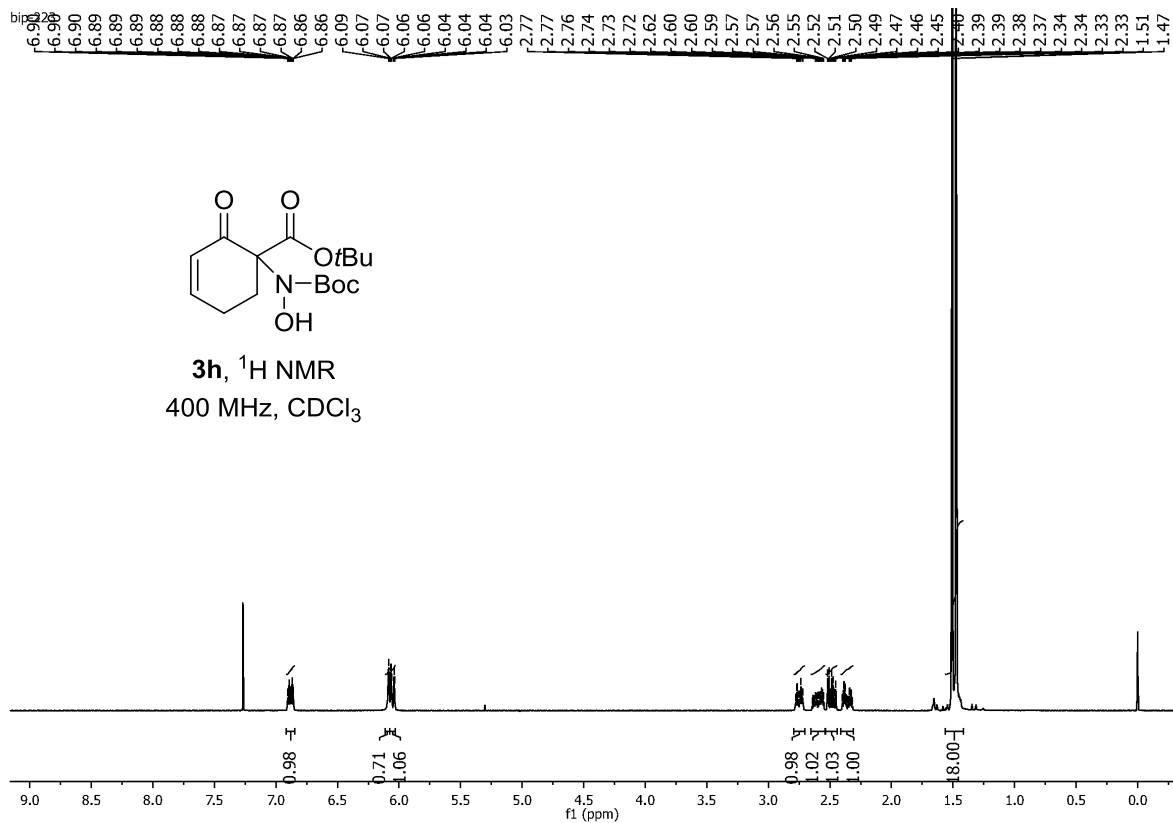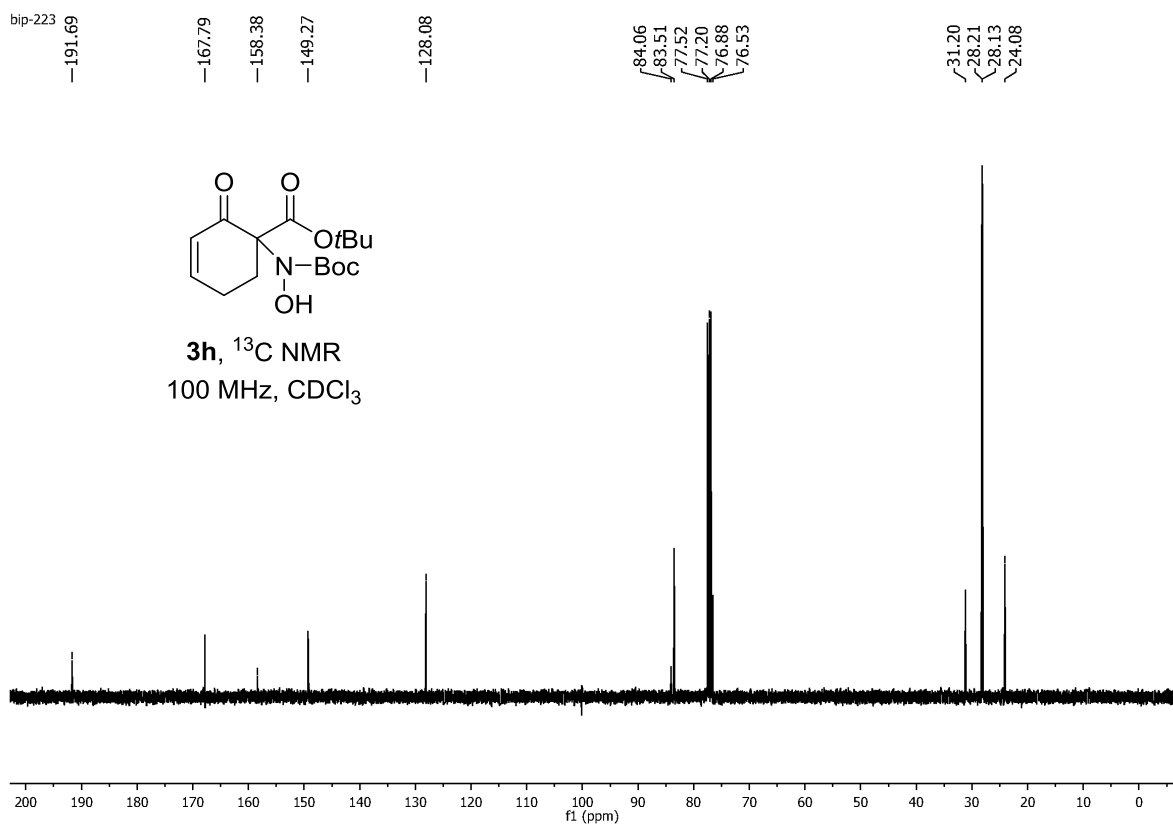

bip-207

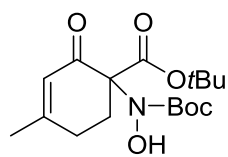

**3i**,  $^1\text{H}$  NMR  
400 MHz,  $\text{CDCl}_3$

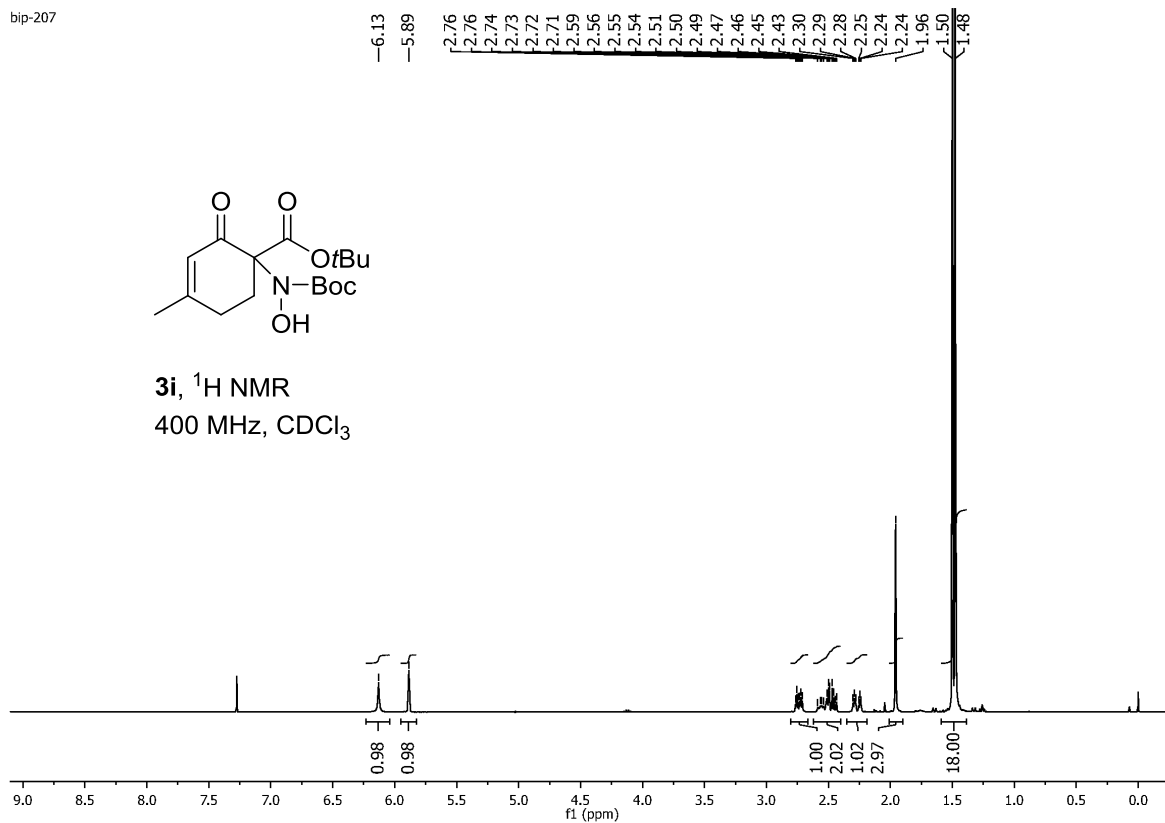

bip-207

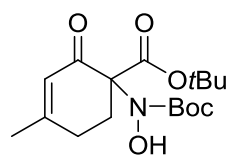

**3i**,  $^{13}\text{C}$  NMR  
100 MHz,  $\text{CDCl}_3$

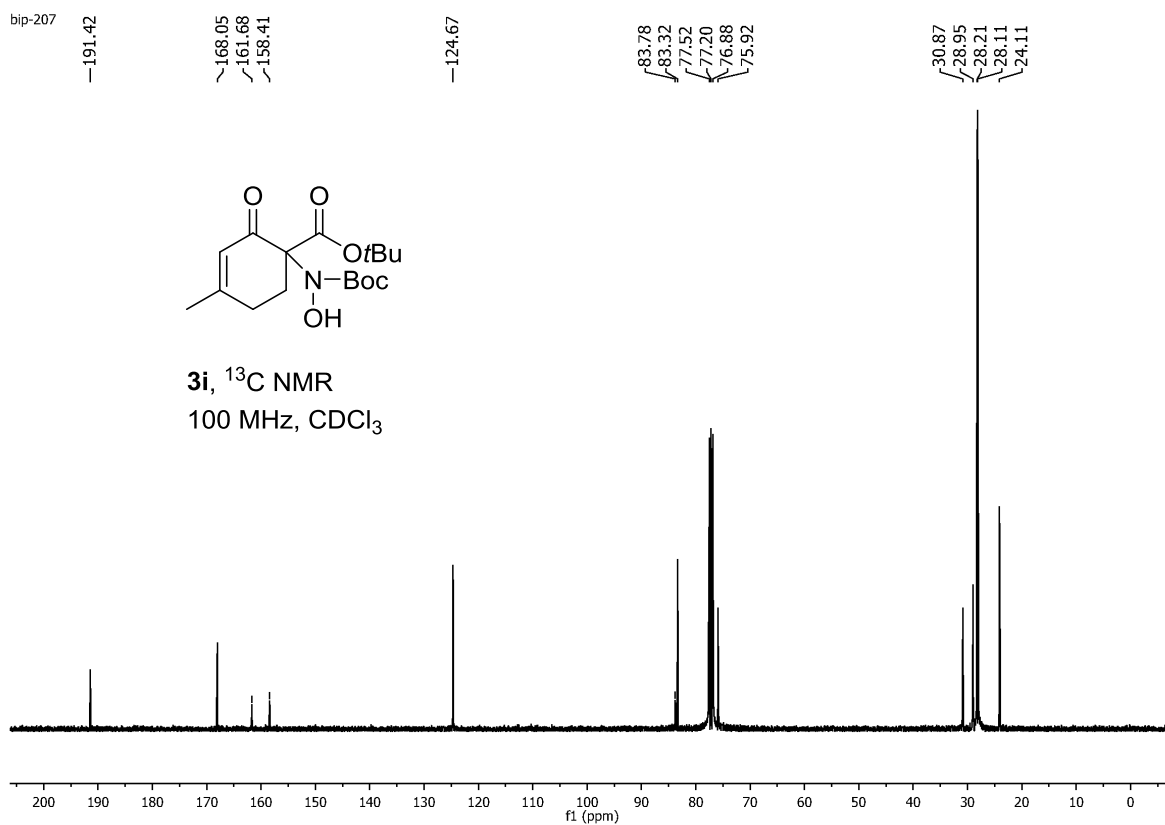

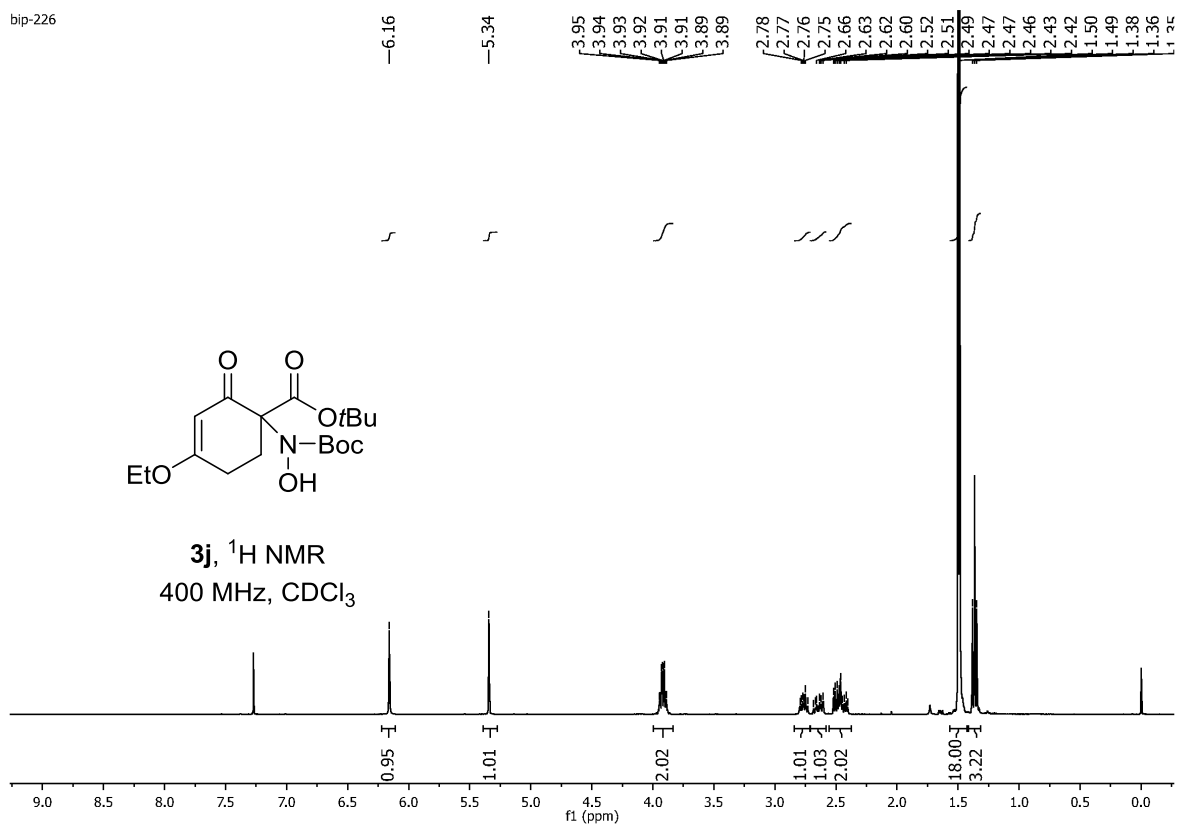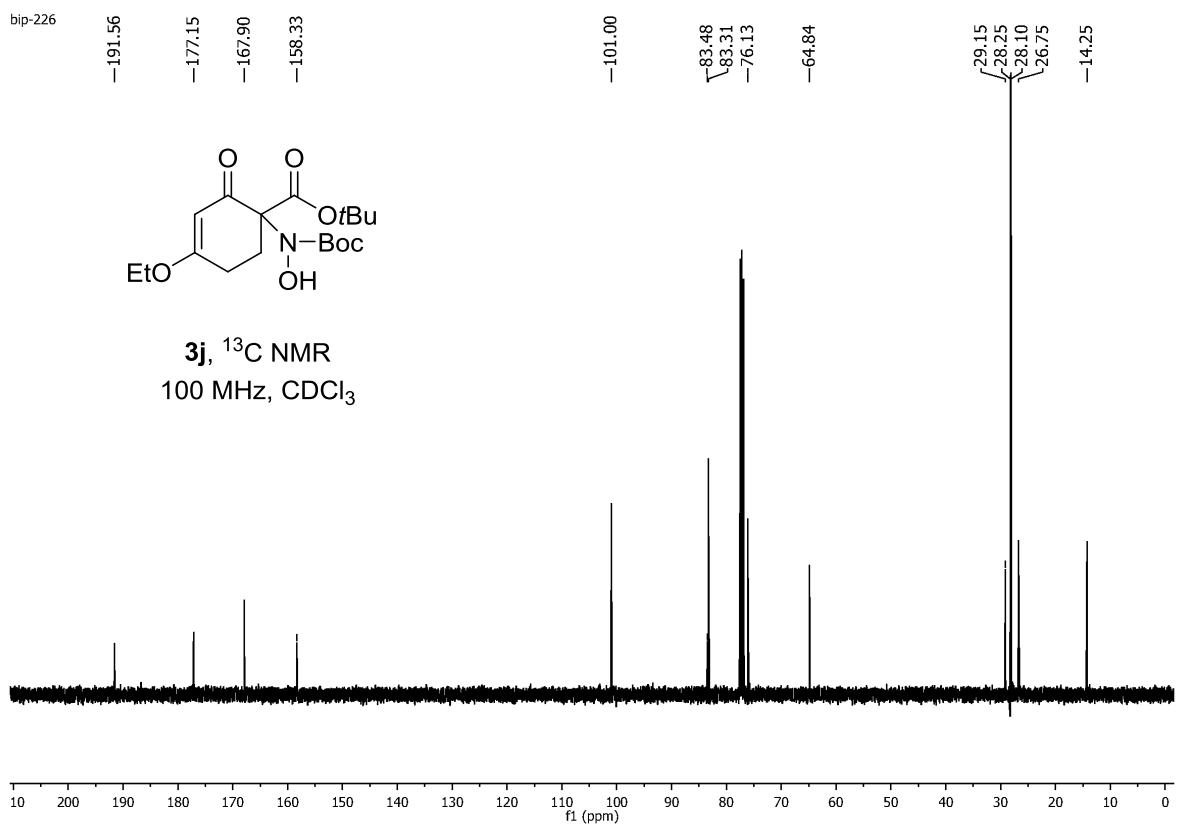

bip-217

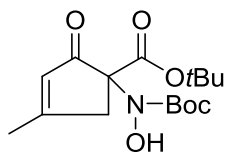

**3k**,  $^1\text{H}$  NMR  
400 MHz,  $\text{CDCl}_3$

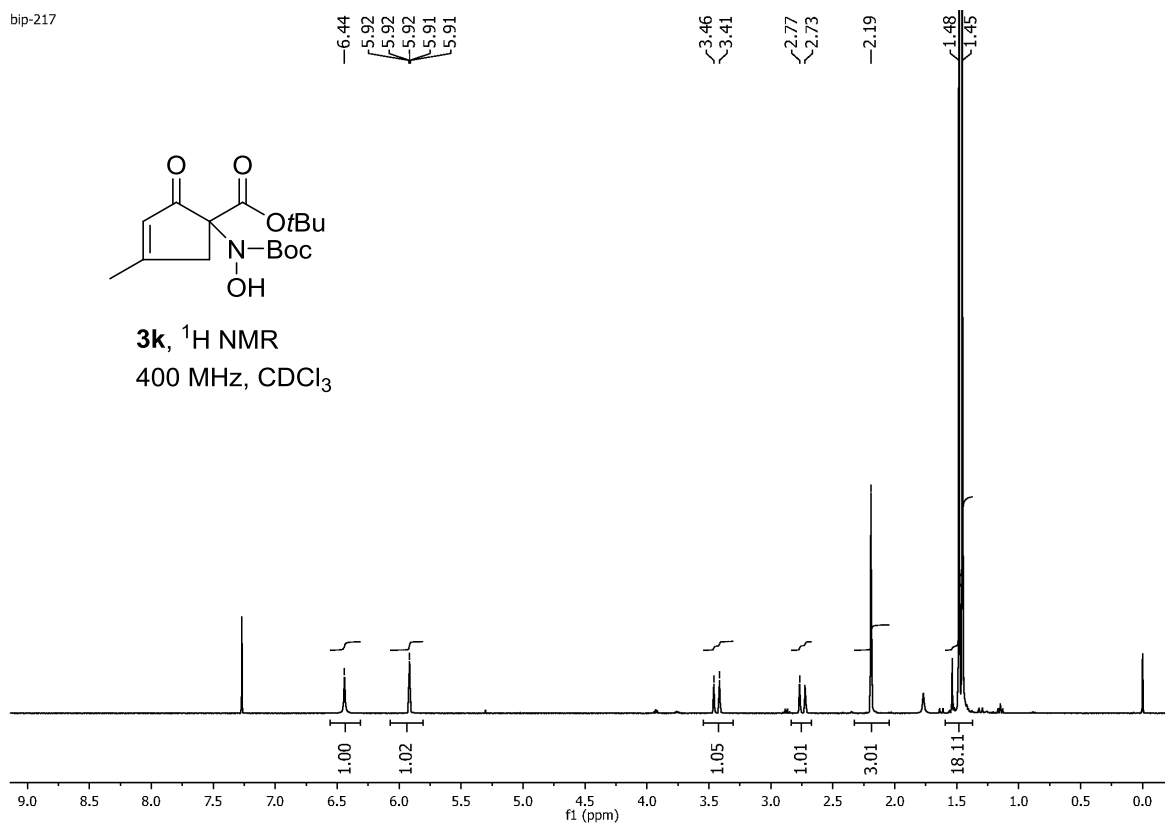

bip-217

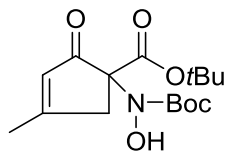

**3k**,  $^{13}\text{C}$  NMR  
100 MHz,  $\text{CDCl}_3$

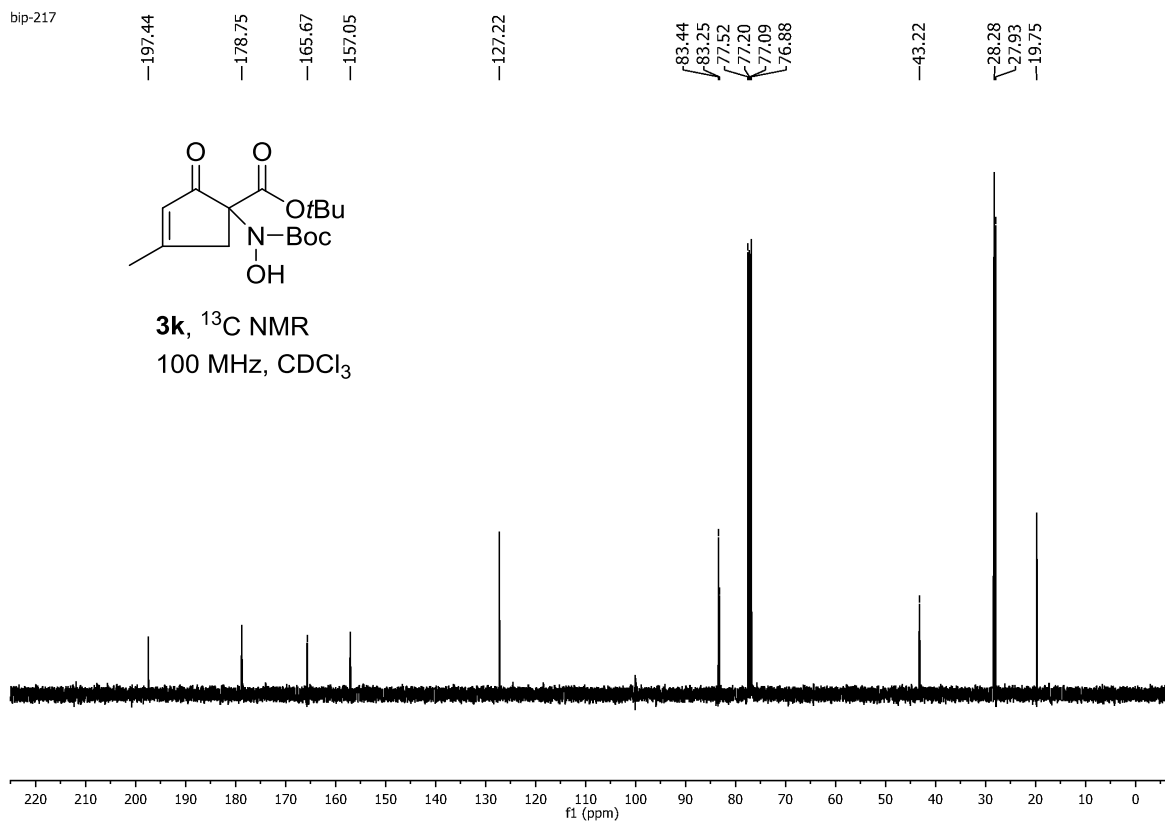



bip-218

7.41  
7.40  
7.40  
7.39  
7.39  
7.39

6.51

3.45  
3.45  
3.44  
3.43  
3.43  
3.40  
3.40  
3.39  
3.39  
3.38  
2.77  
2.76  
2.76  
2.75  
2.74  
2.72  
2.72  
2.71  
2.70  
2.70  
1.83  
1.82  
1.82  
1.81  
1.47  
1.45

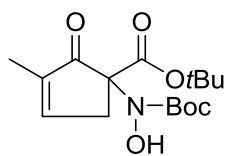

**3I**,  $^1\text{H}$  NMR  
400 MHz,  $\text{CDCl}_3$

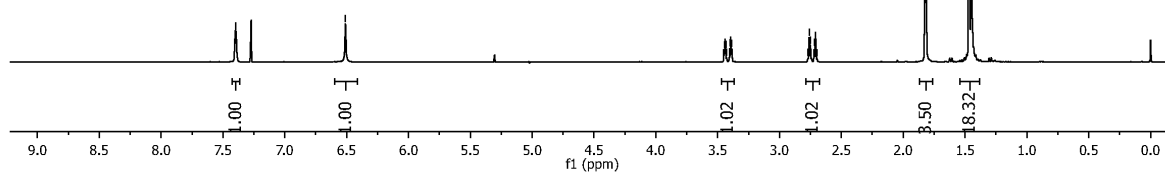

bip-218

198.00

165.77

157.31  
157.03

138.96

83.49  
83.28  
77.52  
77.20  
76.88  
75.53

37.73

28.27

27.93

10.88

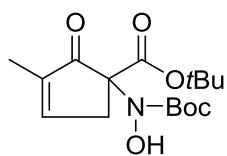

**3I**,  $^{13}\text{C}$  NMR  
100 MHz,  $\text{CDCl}_3$

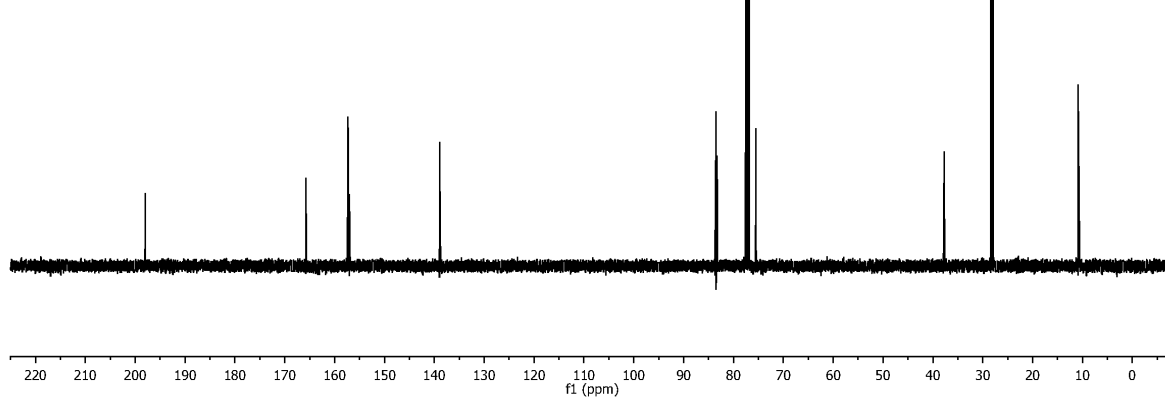

bip-224

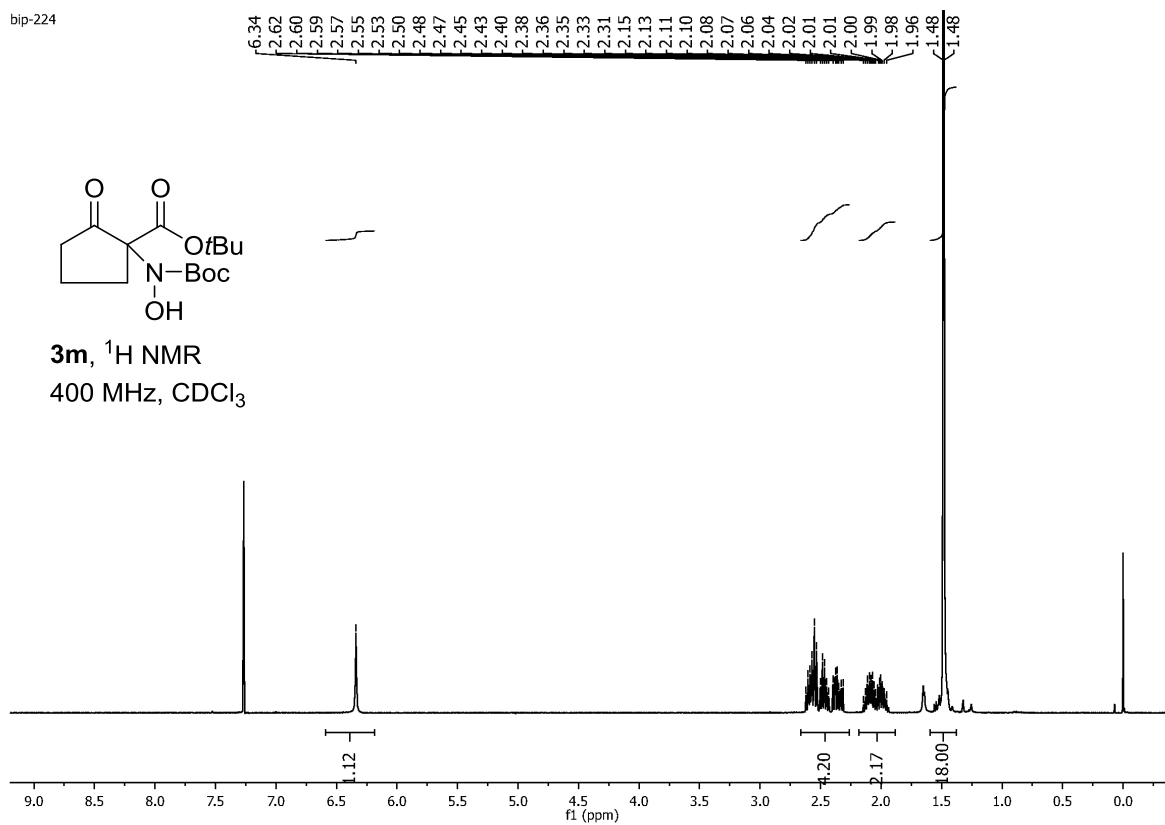

bip-224

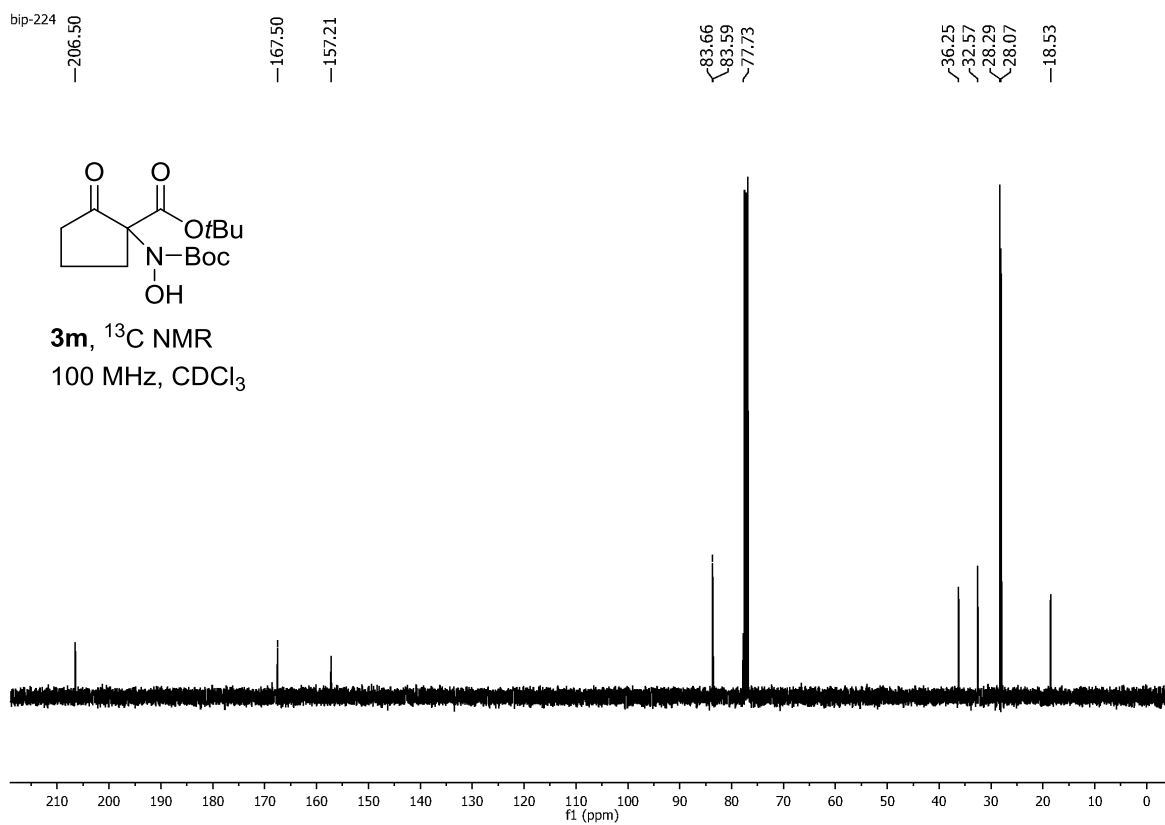

bip-229

-6.30

-2.28

1.68

1.50

1.48

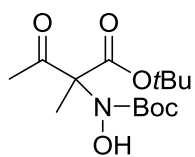

**3n**,  $^1\text{H}$  NMR  
400 MHz,  $\text{CDCl}_3$

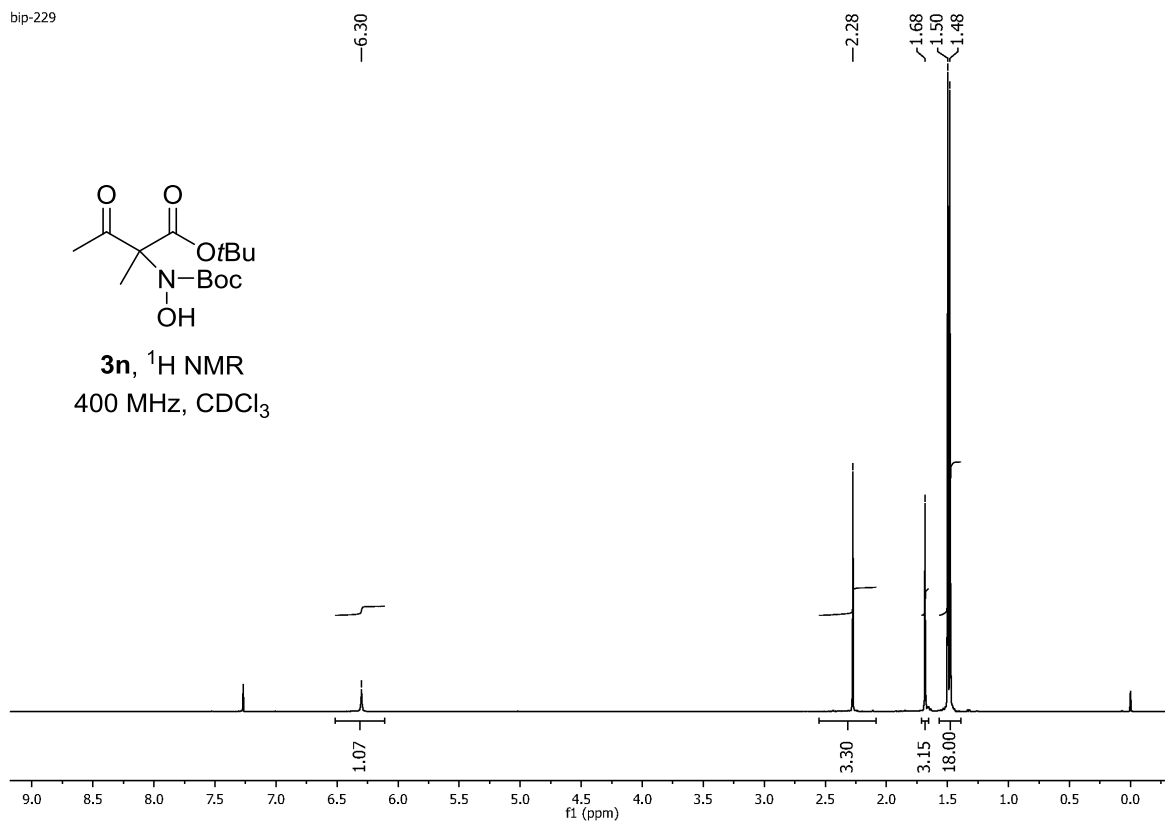

bip-229

-199.98

-168.23

-158.03

84.37

83.57

78.92

77.52

77.20

76.88

28.18

28.05

25.47

19.25

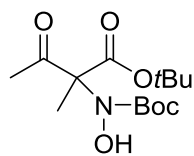

**3n**,  $^{13}\text{C}$  NMR  
100 MHz,  $\text{CDCl}_3$

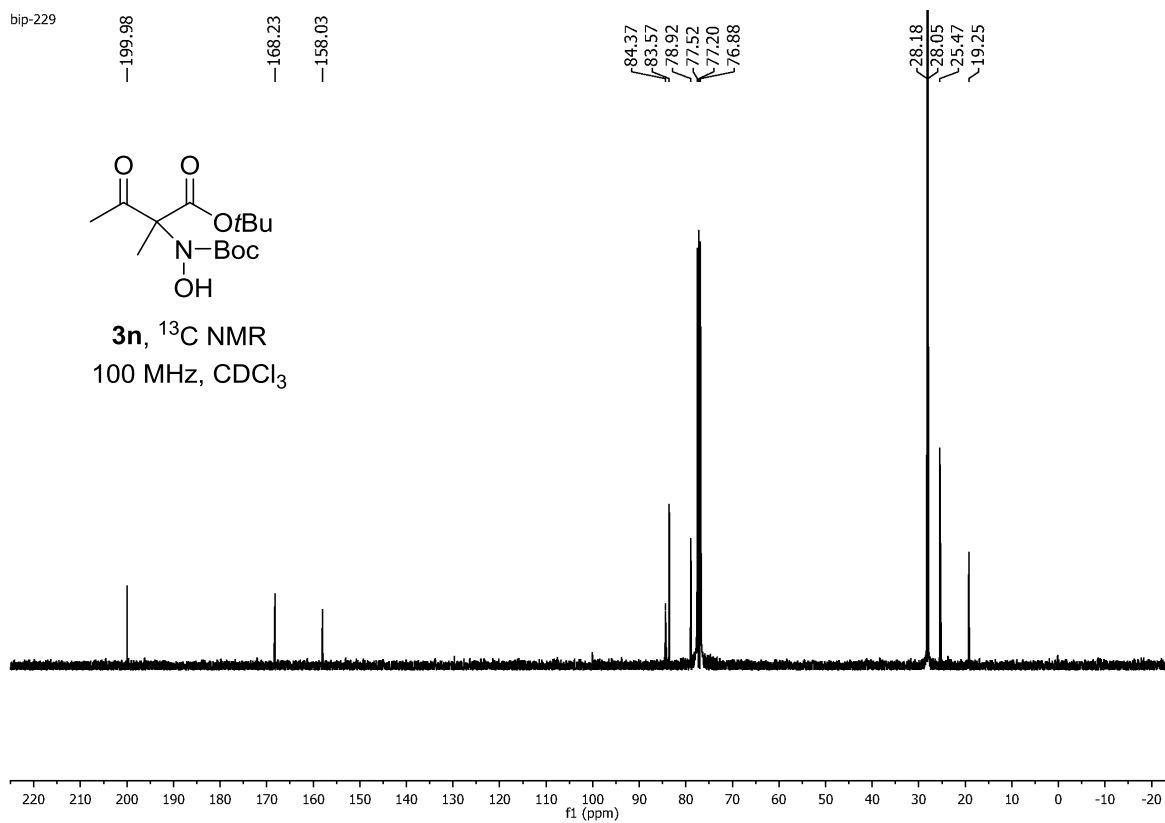

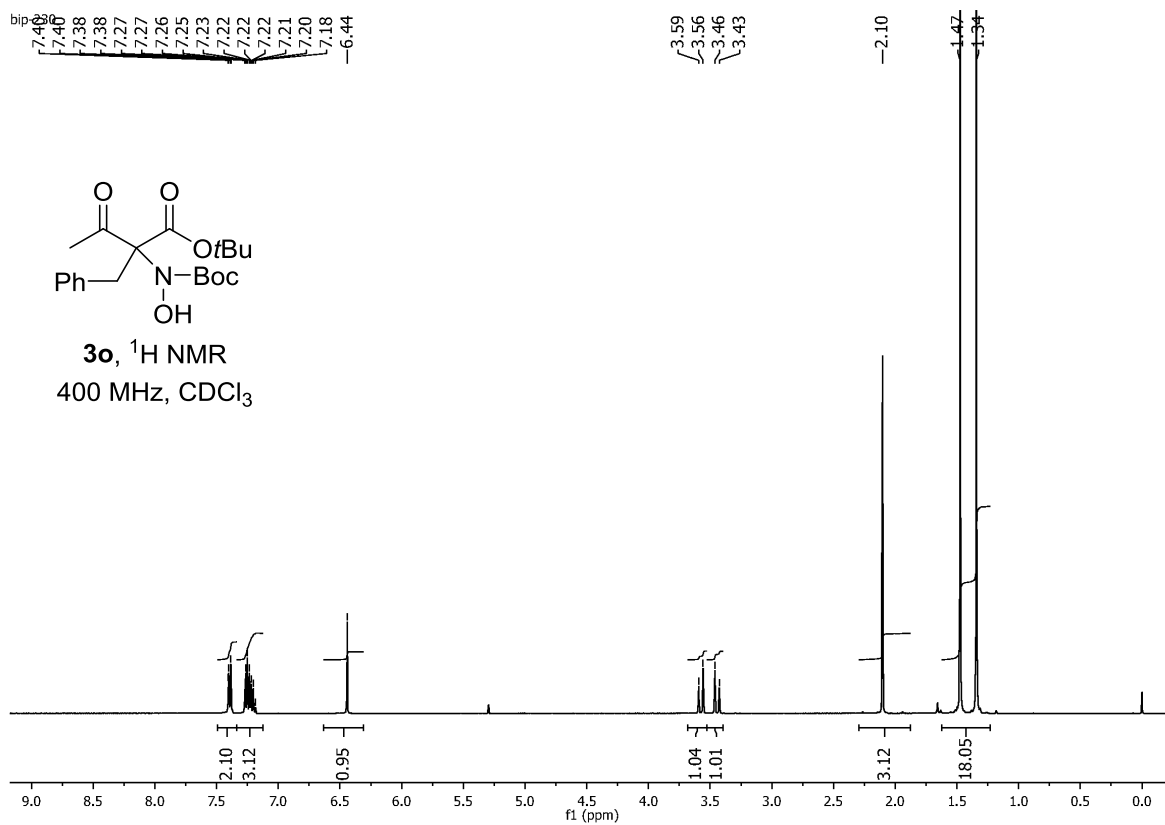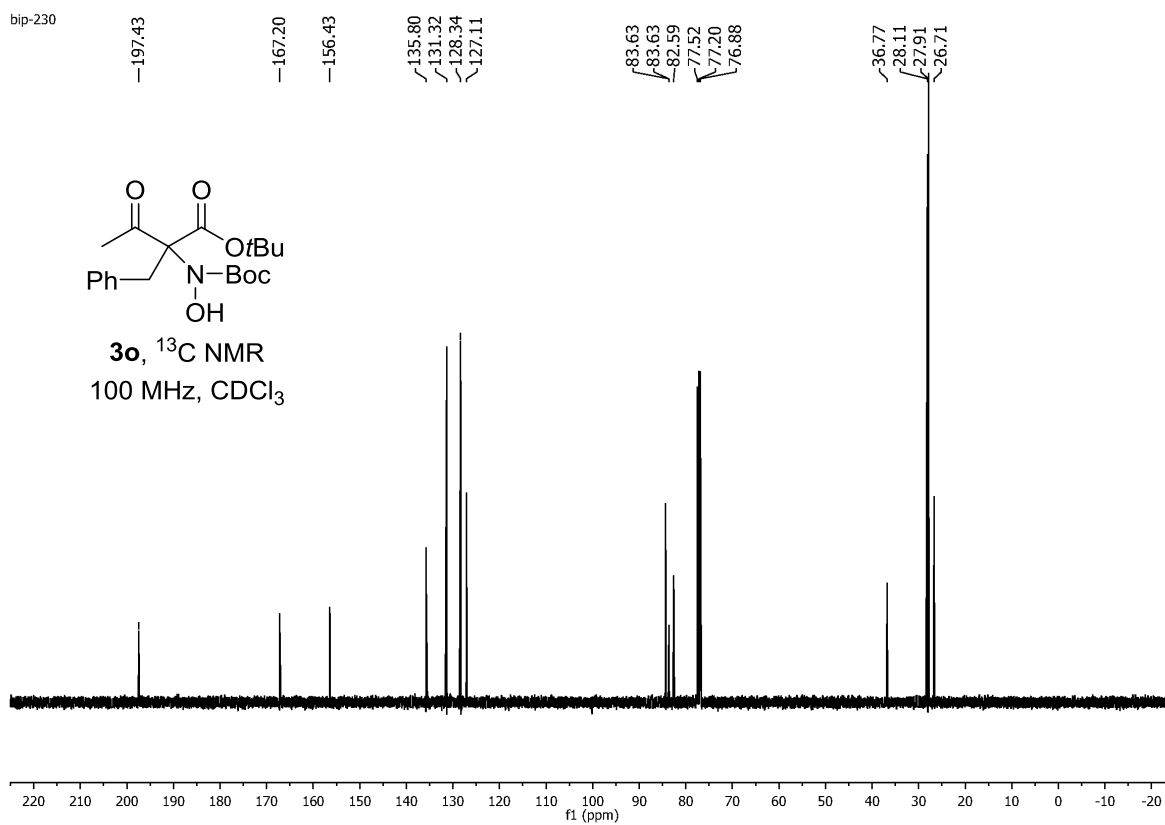

bip-231

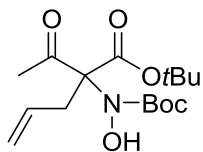

**3p**,  $^1\text{H}$  NMR  
400 MHz,  $\text{CDCl}_3$

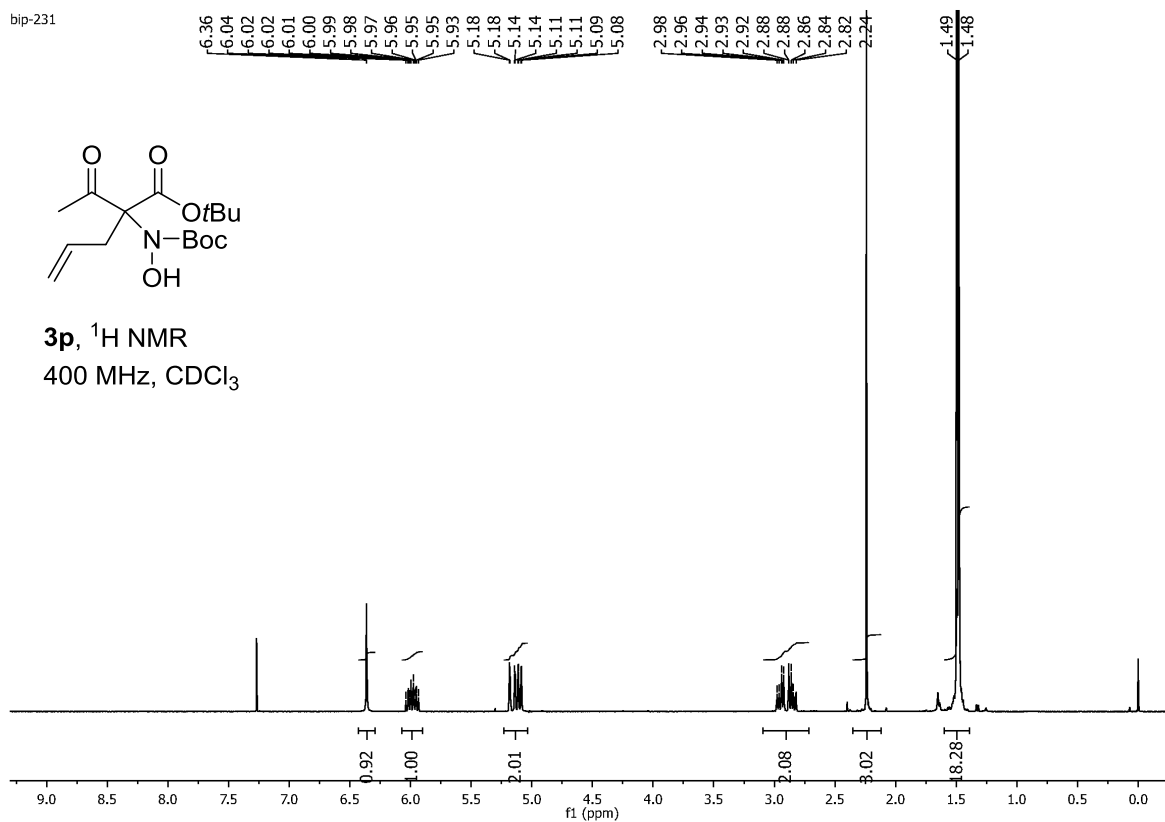

bip-231

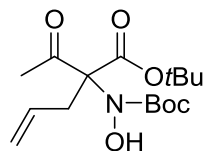

**3p**,  $^1\text{H}$  NMR  
400 MHz,  $\text{CDCl}_3$

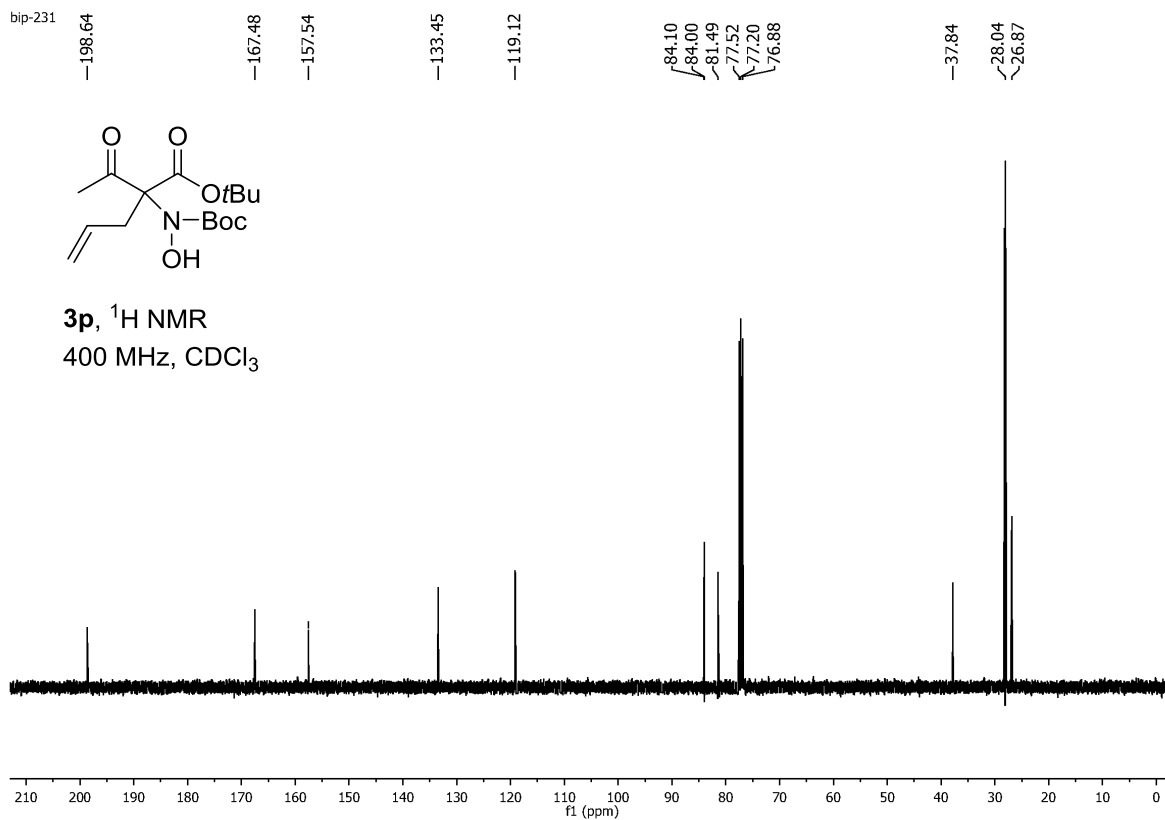

bip-240

-6.35

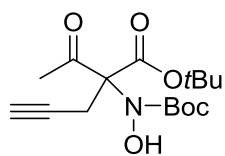

**3q**,  $^1\text{H}$  NMR  
400 MHz,  $\text{CDCl}_3$

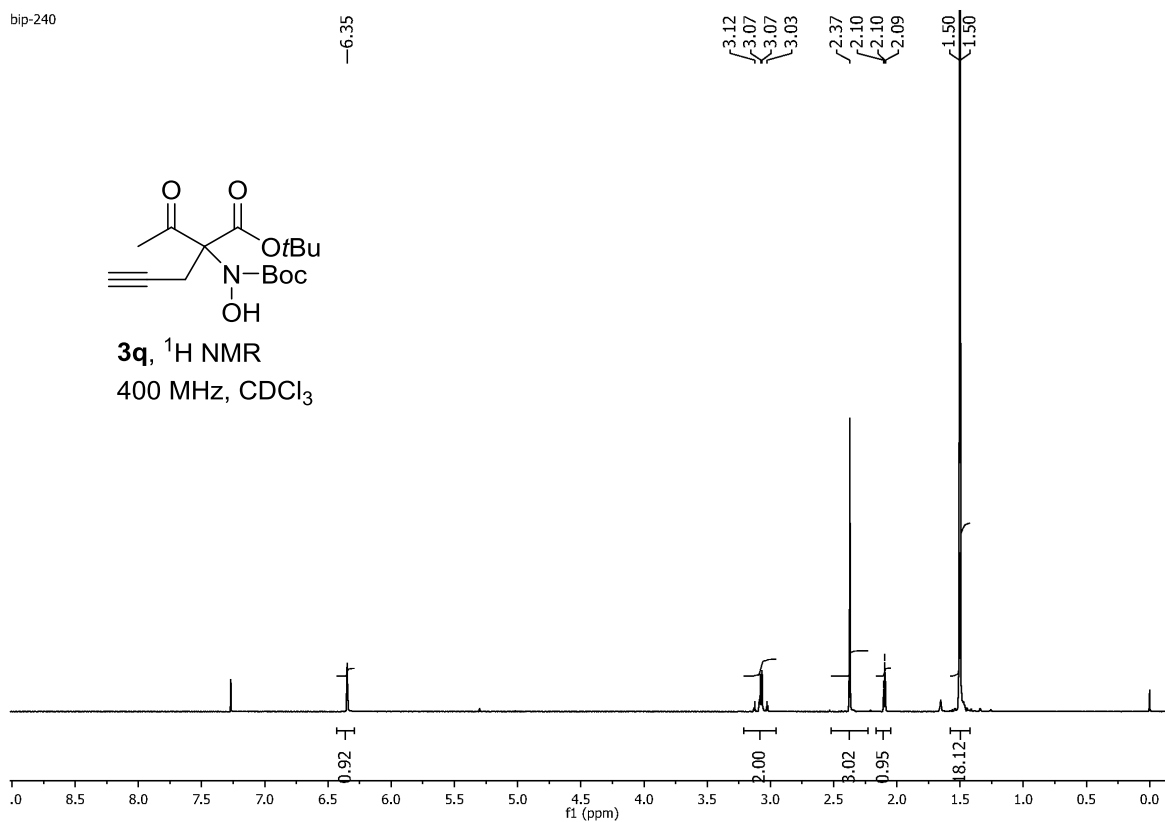

bip-240

-198.28

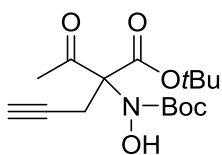

**3q**,  $^{13}\text{C}$  NMR  
100 MHz,  $\text{CDCl}_3$

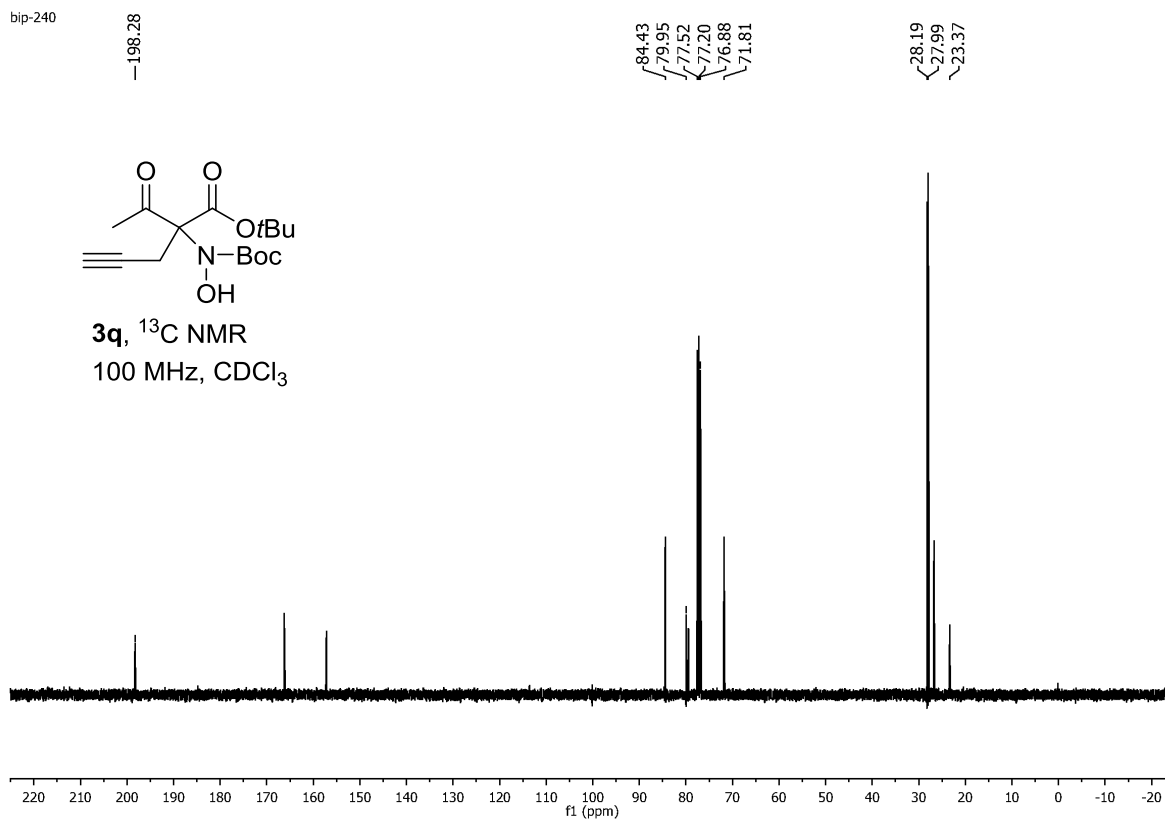



bip-225

8.20  
8.19  
7.55  
7.53  
7.51  
7.43  
7.42  
7.40  
6.70

1.85  
1.47  
1.27

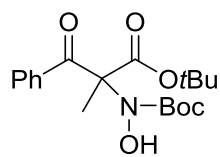

**3r**,  $^1\text{H}$  NMR  
400 MHz,  $\text{CDCl}_3$

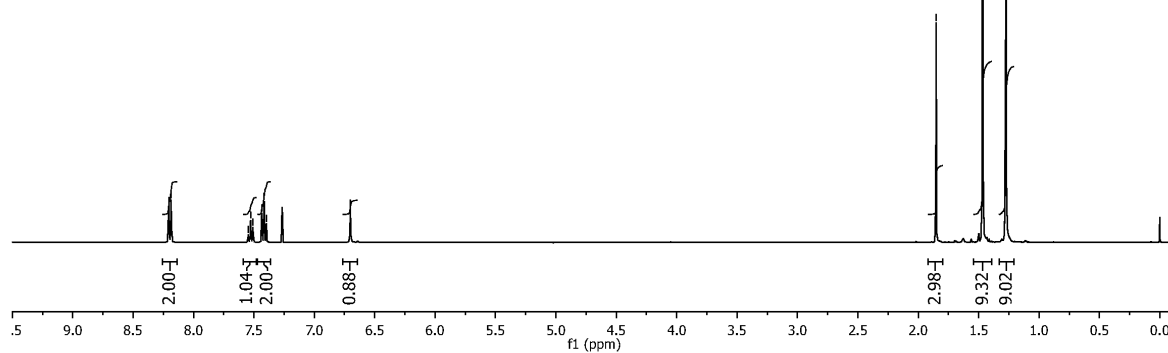

bip-225

191.41

168.83

157.81

135.12

132.99

129.75

128.36

84.76

83.70

78.57

28.02

27.93

20.47

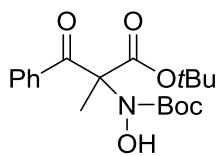

**3r**,  $^{13}\text{C}$  NMR  
100 MHz,  $\text{CDCl}_3$

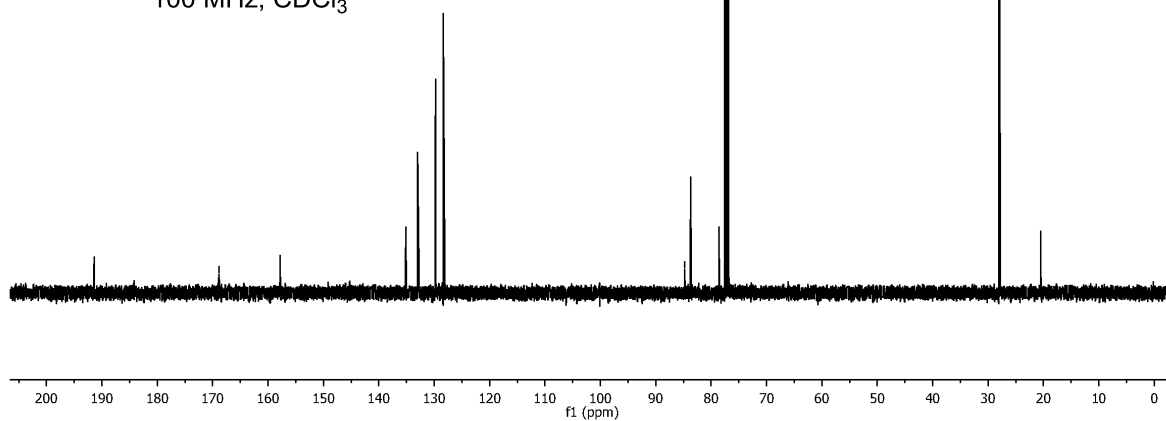

bip-245

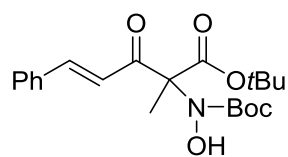

**3s**,  $^1\text{H}$  NMR  
400 MHz,  $\text{CDCl}_3$

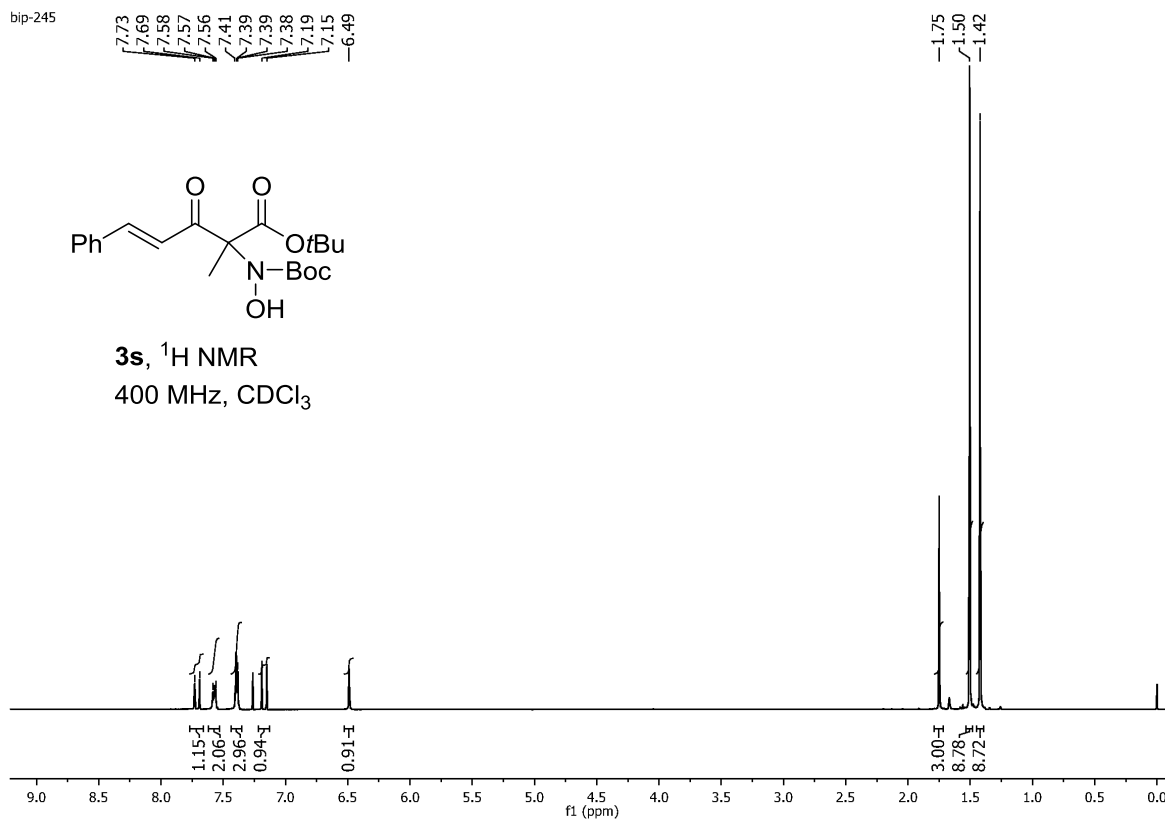

bip-245

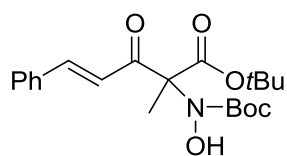

**3s**,  $^{13}\text{C}$  NMR  
100 MHz,  $\text{CDCl}_3$

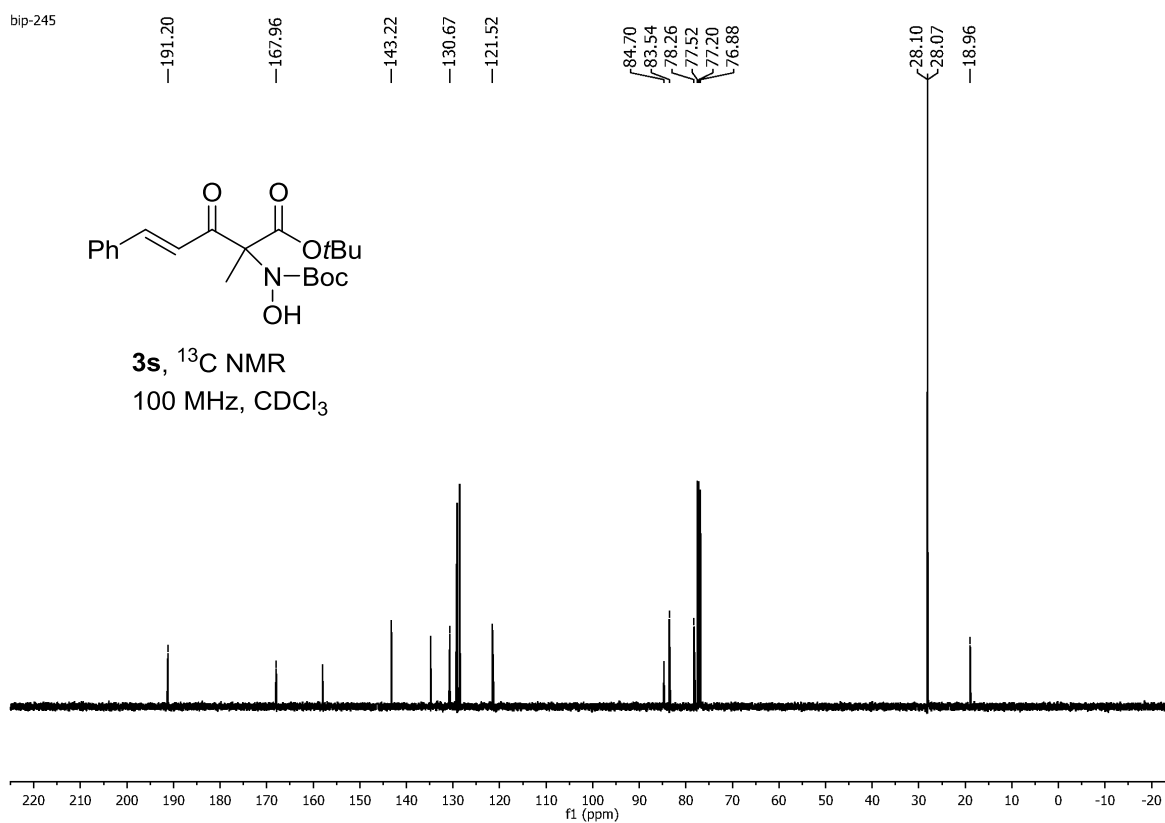

bip-241

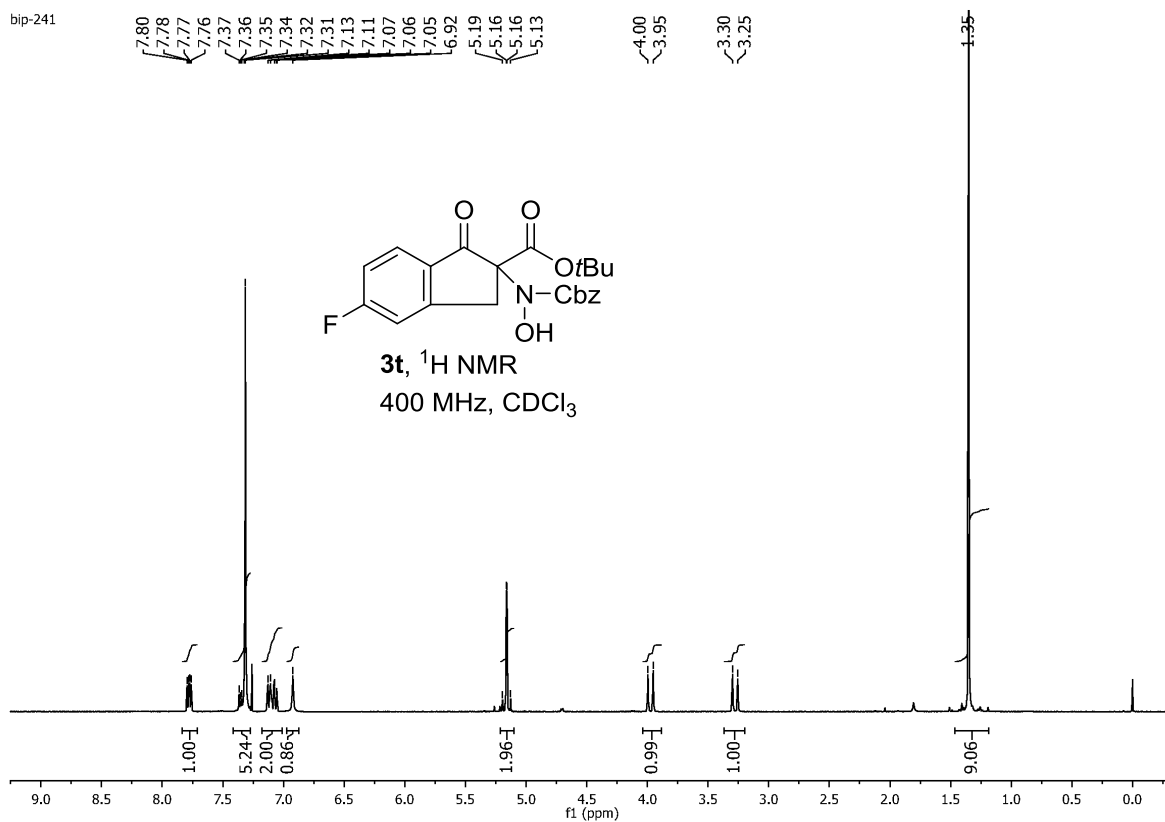

bip-241

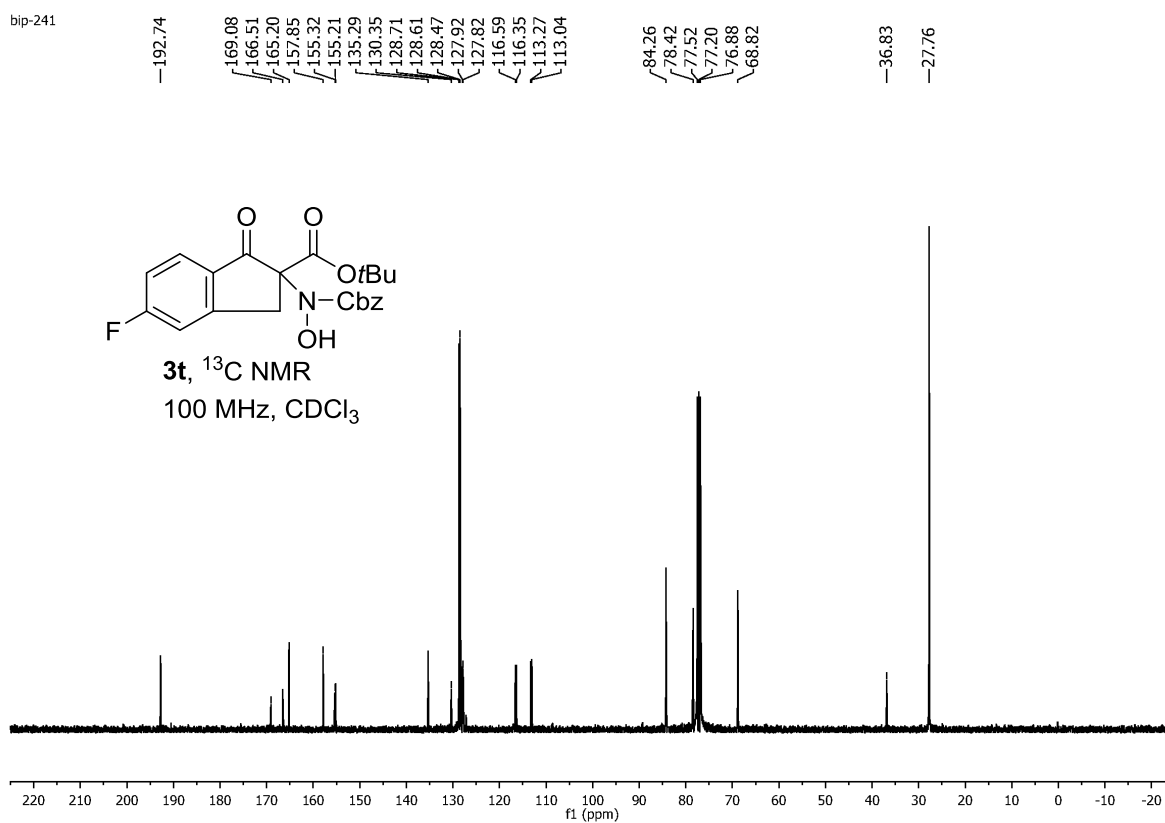

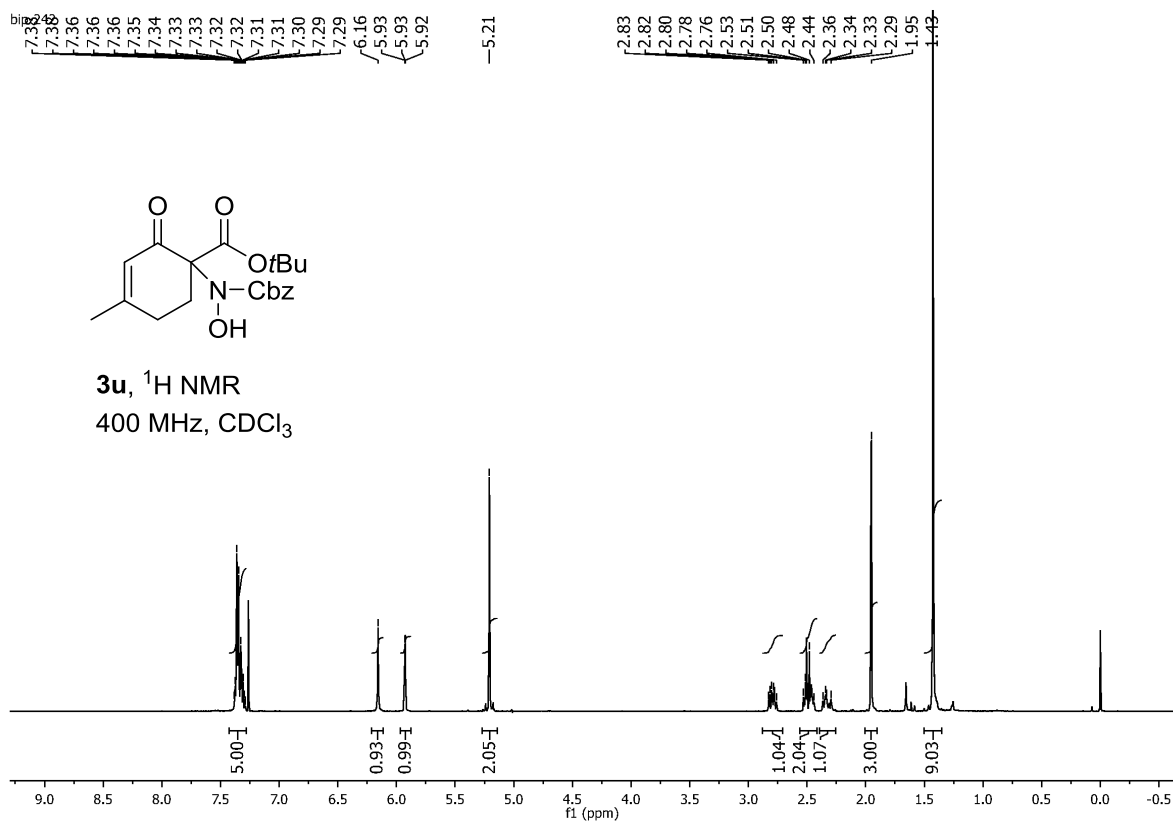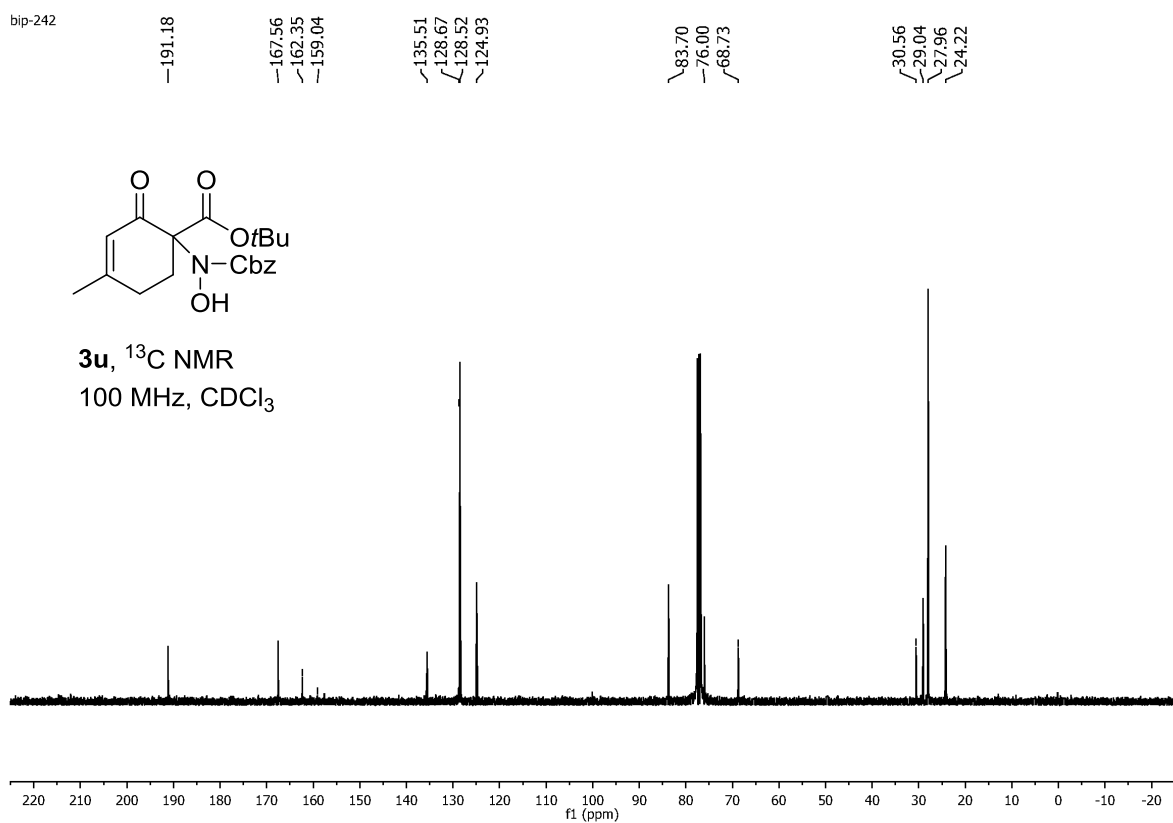

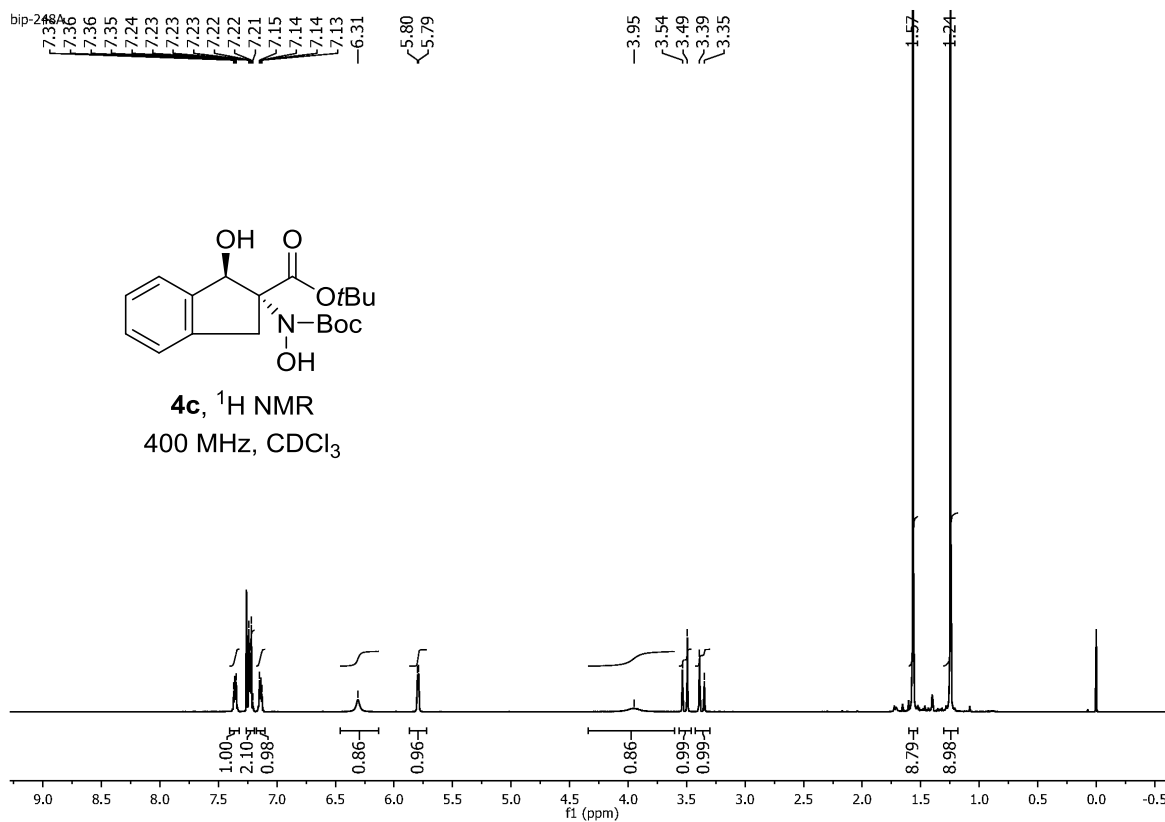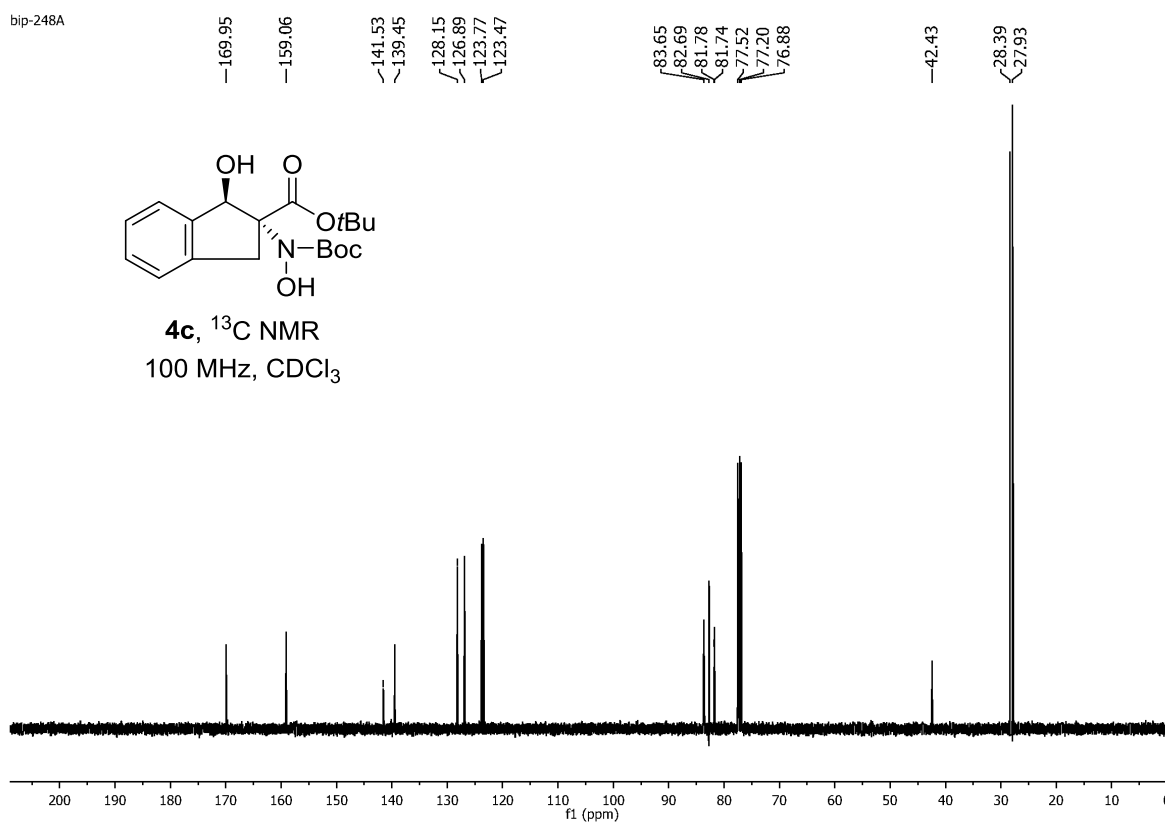

bip-249-1

7.80  
7.78  
7.63  
7.62  
7.60  
7.47  
7.45  
7.40  
7.38  
7.36

-5.98

3.69  
3.64  
3.53  
3.49

1.43  
1.29

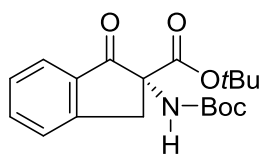

**5c-Boc**,  $^1\text{H}$  NMR  
400 MHz,  $\text{CDCl}_3$

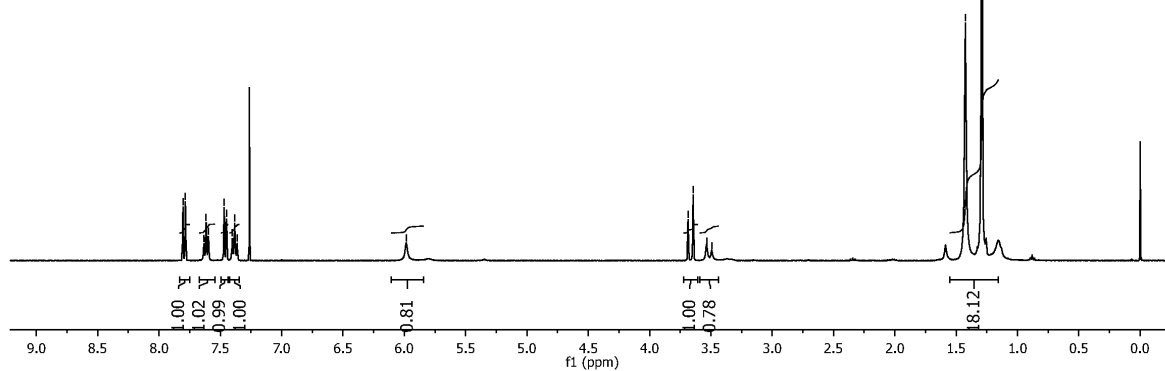

bip-249

7.80  
7.78  
7.65  
7.63  
7.63  
7.61  
7.48  
7.46  
7.43  
7.41  
7.39

3.66  
3.62  
3.08  
3.03

-1.94

1.34

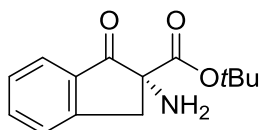

**5c**,  $^1\text{H}$  NMR  
400 MHz,  $\text{CDCl}_3$

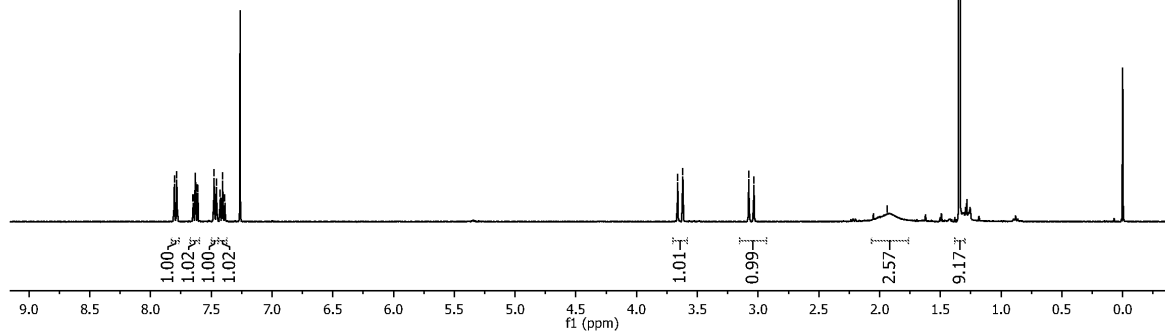



bip-251

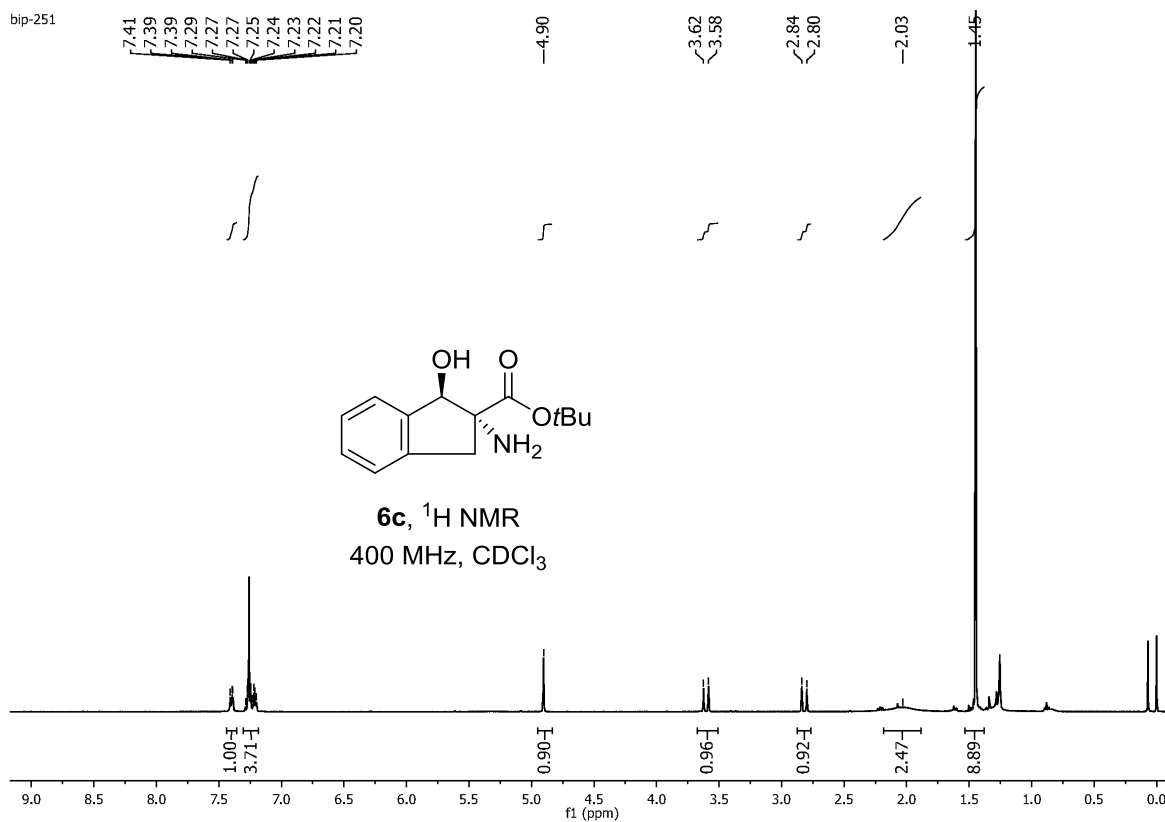

## 8. Copies of HPLC chromatogram

HPLC chromatogram of **3a**:

Daicel Chiralpak AS-H, hexane/*i*-PrOH = 96/4, flow rate = 1.0 mL/min,  $\lambda$  = 245 nm, retention time;  
 $t_R$ (minor) = 17.3 min,  $t_R$ (major) = 19.8 min.

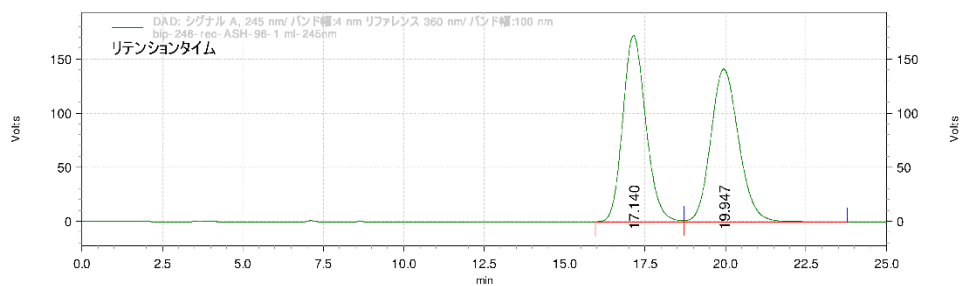

DAD: シグナル A, 245 nm/ バンド幅:4 nm リファレンス  
 360 nm/ バンド幅:100 nm 結果  
 リテンションタイム

|        | 面積%    |
|--------|--------|
| 17.140 | 50.148 |
| 19.947 | 49.852 |

|    |         |
|----|---------|
| 合計 | 100.000 |
|----|---------|

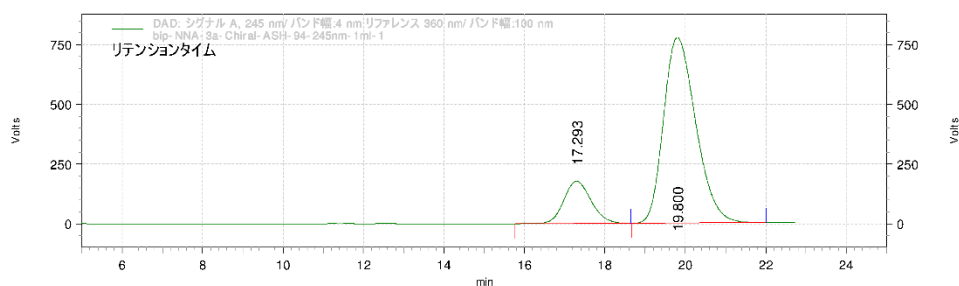

DAD: シグナル A, 245 nm/ バンド幅:4 nm リファレンス  
 360 nm/ バンド幅:100 nm 結果  
 リテンションタイム

|        | 面積%    |
|--------|--------|
| 17.293 | 16.100 |
| 19.800 | 83.900 |

|    |         |
|----|---------|
| 合計 | 100.000 |
|----|---------|

Daicel Chiralpak OD-H, hexane/*i*-PrOH = 98/2, flow rate = 1.0 mL/min,  $\lambda$  = 254 nm, retention time;  $t_R$ (major) = 8.7 min,  $t_R$ (minor) = 11.0 min.

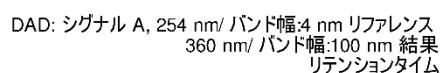

DAD: シグナル A, 254 nm/ バンド幅:4 nm リファレンス  
360 nm/ バンド幅:100 nm 結果  
リテンションタイム

| リテンションタイム |  | 面積%     |
|-----------|--|---------|
| 8.707     |  | 90.845  |
| 11.020    |  | 9.155   |
| 合計        |  | 100.000 |

# HPLC chromatogram of **3c**:

Daicel Chiralpak OD-H, hexane/*i*-PrOH = 96/4, flow rate = 1.0 mL/min,  $\lambda$  = 245 nm, retention time;  $t_R$ (minor) = 6.9 min,  $t_R$ (major) = 8.2 min.

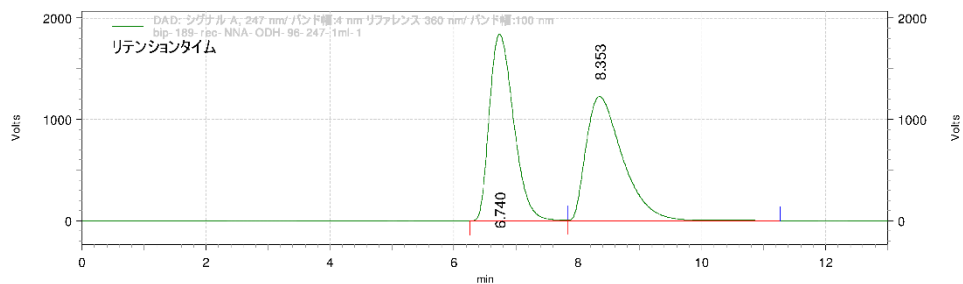

DAD: シグナル A, 247 nm/ バンド幅:4 nm リファレンス  
360 nm/ バンド幅:100 nm 結果  
リテンションタイム

|       | 面積%    |
|-------|--------|
| 6.740 | 49.946 |
| 8.353 | 50.054 |

|    |         |
|----|---------|
| 合計 | 100.000 |
|----|---------|

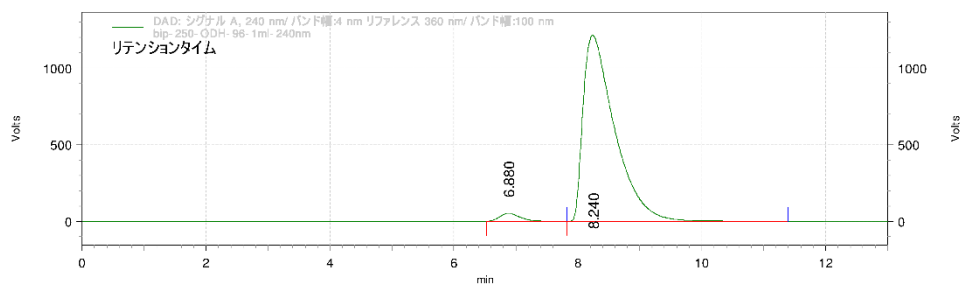

DAD: シグナル A, 240 nm/ バンド幅:4 nm リファレンス  
360 nm/ バンド幅:100 nm 結果  
リテンションタイム

|       | 面積%    |
|-------|--------|
| 6.880 | 2.694  |
| 8.240 | 97.306 |

|    |         |
|----|---------|
| 合計 | 100.000 |
|----|---------|

# HPLC chromatogram of **3d**:

Daicel Chiralpak OD-H, hexane/*i*-PrOH = 97/3, flow rate = 1.0 mL/min,  $\lambda$  = 245 nm, retention time;  
 $t_R$ (minor) = 7.2 min,  $t_R$ (major) = 9.7 min.

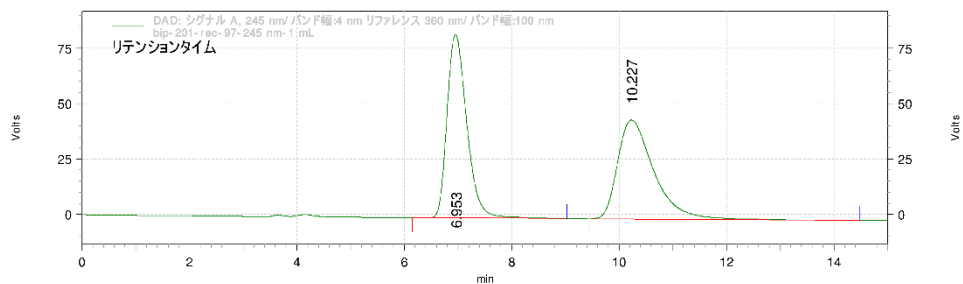

DAD: シグナル A, 245 nm/ バンド幅:4 nm リファレンス  
360 nm/ バンド幅:100 nm 結果  
リテンションタイム

|        | 面積%    |
|--------|--------|
| 6.953  | 50.287 |
| 10.227 | 49.713 |

|    |         |
|----|---------|
| 合計 | 100.000 |
|----|---------|

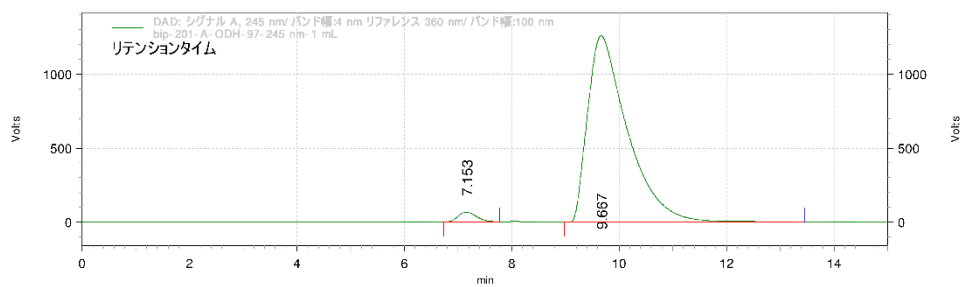

DAD: シグナル A, 245 nm/ バンド幅:4 nm リファレンス  
360 nm/ バンド幅:100 nm 結果  
リテンションタイム

|       | 面積%    |
|-------|--------|
| 7.153 | 2.390  |
| 9.667 | 97.610 |

|    |         |
|----|---------|
| 合計 | 100.000 |
|----|---------|

# HPLC chromatogram of **3e**:

Daicel Chiralpak OD-H, hexane/*i*-PrOH = 98/2, flow rate = 1.0 mL/min,  $\lambda$  = 254 nm, retention time;  
 $t_R$ (minor) = 15.4 min,  $t_R$ (major) = 21.0 min.

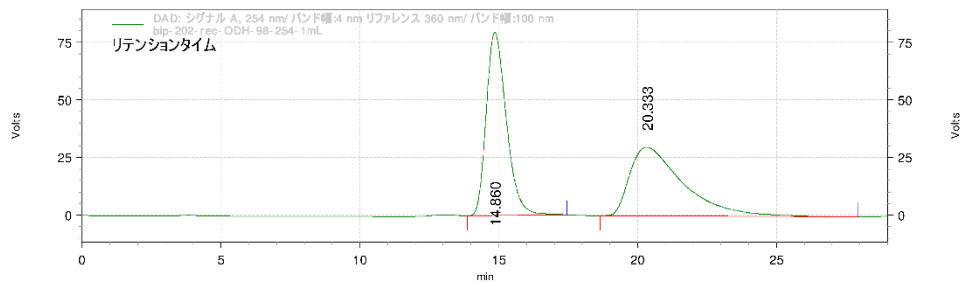

DAD: シグナル A, 254 nm/ バンド幅:4 nm リファレンス  
 360 nm/ バンド幅:100 nm 結果  
 リテンションタイム

|        | 面積%    |
|--------|--------|
| 14.860 | 50.248 |
| 20.333 | 49.752 |

|    |         |
|----|---------|
| 合計 | 100.000 |
|----|---------|

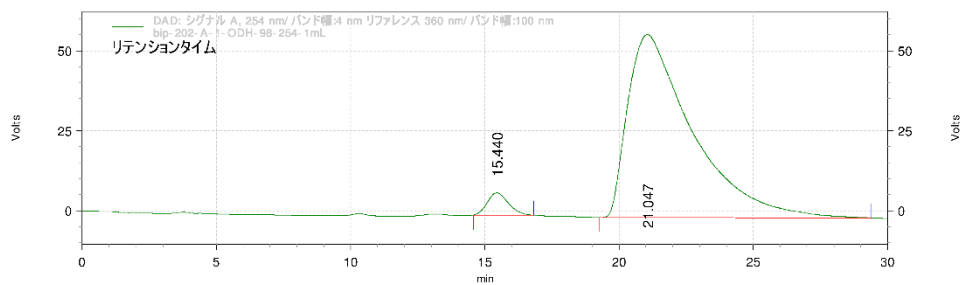

DAD: シグナル A, 254 nm/ バンド幅:4 nm リファレンス  
 360 nm/ バンド幅:100 nm 結果  
 リテンションタイム

|        | 面積%    |
|--------|--------|
| 15.440 | 3.758  |
| 21.047 | 96.242 |

|    |         |
|----|---------|
| 合計 | 100.000 |
|----|---------|

# HPLC chromatogram of **3f**:

Daicel Chiralpak AD-H, hexane/*i*-PrOH = 97/3, flow rate = 1.0 mL/min,  $\lambda$  = 245 nm, retention time;  $t_R$ (minor) = 14.7 min,  $t_R$ (major) = 21.2 min.

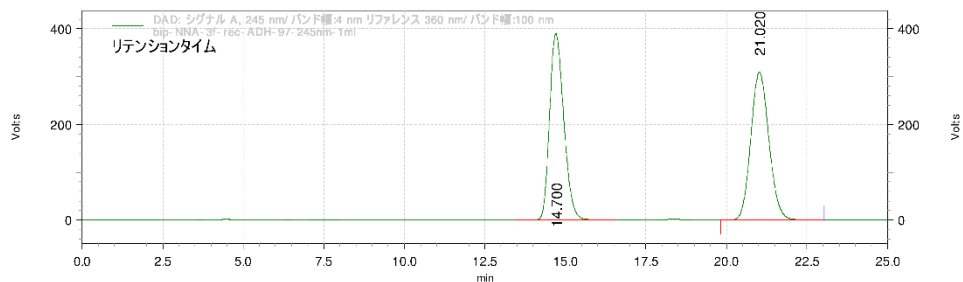

DAD: シグナル A, 245 nm/ バンド幅:4 nm リファレンス  
360 nm/ バンド幅:100 nm 結果  
リテンションタイム

|        | 面積%    |
|--------|--------|
| 14.700 | 49.704 |
| 21.020 | 50.296 |

|    |         |
|----|---------|
| 合計 | 100.000 |
|----|---------|

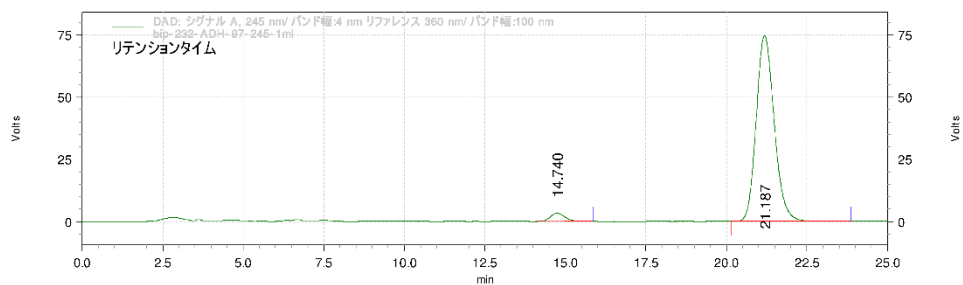

DAD: シグナル A, 245 nm/ バンド幅:4 nm リファレンス  
360 nm/ バンド幅:100 nm 結果  
リテンションタイム

|        | 面積%    |
|--------|--------|
| 14.740 | 3.422  |
| 21.187 | 96.578 |

|    |         |
|----|---------|
| 合計 | 100.000 |
|----|---------|

# HPLC chromatogram of **3g**:

Daicel Chiralpak AD-H, hexane/*i*-PrOH = 98/2, flow rate = 1.0 mL/min,  $\lambda$  = 254 nm, retention time;  
 $t_R$ (major) = 48.6 min,  $t_R$ (minor) = 54.4 min.

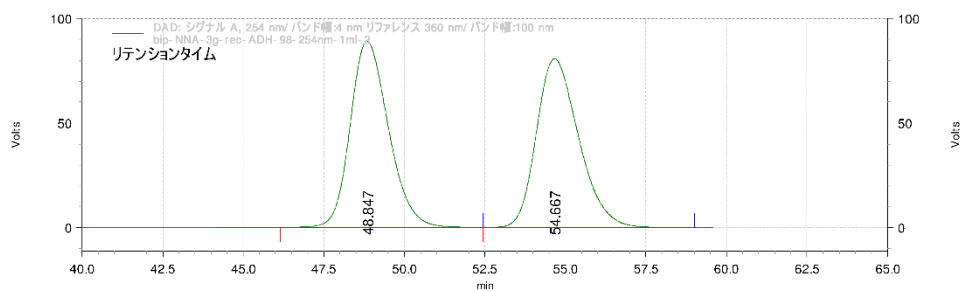

DAD: シグナル A, 254 nm/ バンド幅:4 nm リファレンス  
 360 nm/ バンド幅:100 nm 結果  
 リテンションタイム

|        | 面積%    |
|--------|--------|
| 48.847 | 49.973 |
| 54.667 | 50.027 |

|    |         |
|----|---------|
| 合計 | 100.000 |
|----|---------|

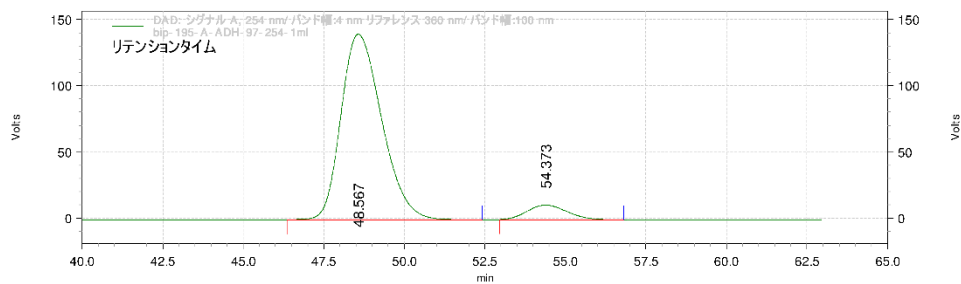

DAD: シグナル A, 254 nm/ バンド幅:4 nm リファレンス  
 360 nm/ バンド幅:100 nm 結果  
 リテンションタイム

|        | 面積%    |
|--------|--------|
| 48.567 | 92.785 |
| 54.373 | 7.215  |

|    |         |
|----|---------|
| 合計 | 100.000 |
|----|---------|



# HPLC chromatogram of **3h**:

Daicel Chiralpak AD-H, hexane/*i*-PrOH = 97/3, flow rate = 1.0 mL/min,  $\lambda$  = 230 nm, retention time;  $t_R$ (minor) = 20.6 min,  $t_R$ (major) = 23.8 min.

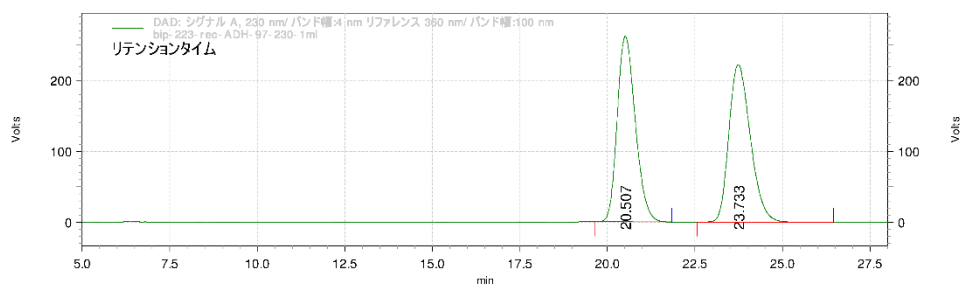

DAD: シグナル A, 230 nm/ バンド幅:4 nm リファレンス  
360 nm/ バンド幅:100 nm 結果  
リテンションタイム

|        | 面積%    |
|--------|--------|
| 20.507 | 49.659 |
| 23.733 | 50.341 |

|    |         |
|----|---------|
| 合計 | 100.000 |
|----|---------|

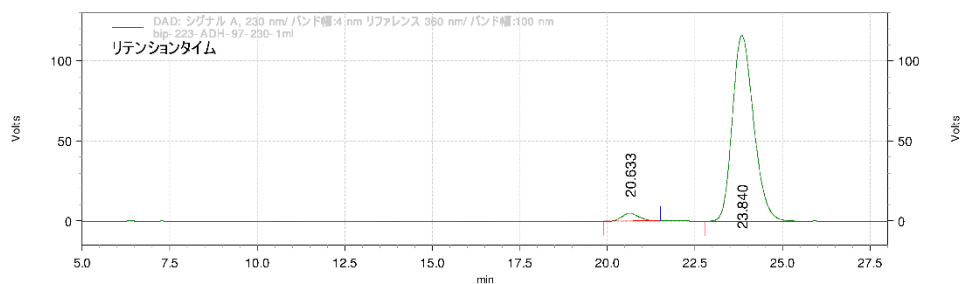

DAD: シグナル A, 230 nm/ バンド幅:4 nm リファレンス  
360 nm/ バンド幅:100 nm 結果  
リテンションタイム

|        | 面積%    |
|--------|--------|
| 20.633 | 3.358  |
| 23.840 | 96.642 |

|    |         |
|----|---------|
| 合計 | 100.000 |
|----|---------|

HPLC chromatogram of **3i**:

Daicel Chiralpak AD-H, hexane/*i*-PrOH = 97/3, flow rate = 1.0 mL/min,  $\lambda$  = 230 nm, retention time;  
 $t_R$ (minor) = 19.5 min,  $t_R$ (major) = 24.1 min.

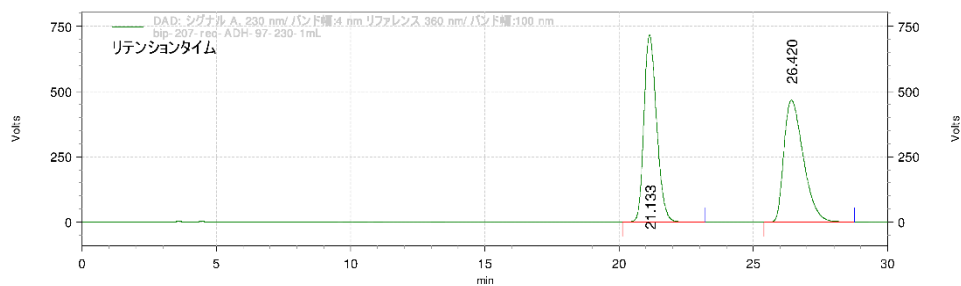

DAD: シグナル A, 230 nm/ バンド幅:4 nm リファレンス  
 360 nm/ バンド幅:100 nm 結果  
 リテンションタイム

|        | 面積%    |
|--------|--------|
| 21.133 | 50.065 |
| 26.420 | 49.935 |

|    |         |
|----|---------|
| 合計 | 100.000 |
|----|---------|

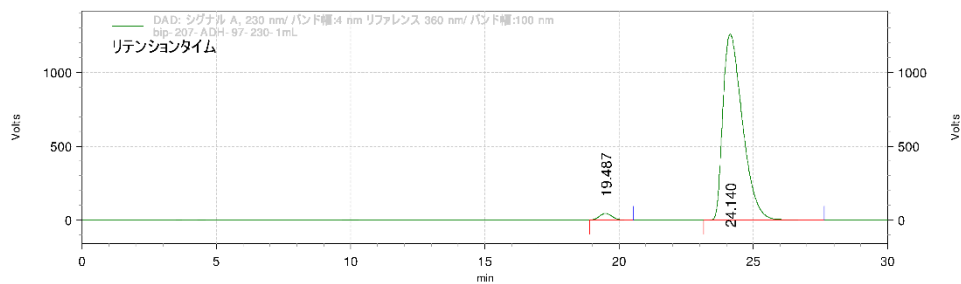

DAD: シグナル A, 230 nm/ バンド幅:4 nm リファレンス  
 360 nm/ バンド幅:100 nm 結果  
 リテンションタイム

|        | 面積%    |
|--------|--------|
| 19.487 | 2.269  |
| 24.140 | 97.731 |

|    |         |
|----|---------|
| 合計 | 100.000 |
|----|---------|

# HPLC chromatogram of **3j**:

Daicel Chiralpak AD-H, hexane/*i*-PrOH = 97/3, flow rate = 1.0 mL/min,  $\lambda$  = 230 nm, retention time;  $t_R$ (minor) = 32.2 min,  $t_R$ (major) = 41.5 min.

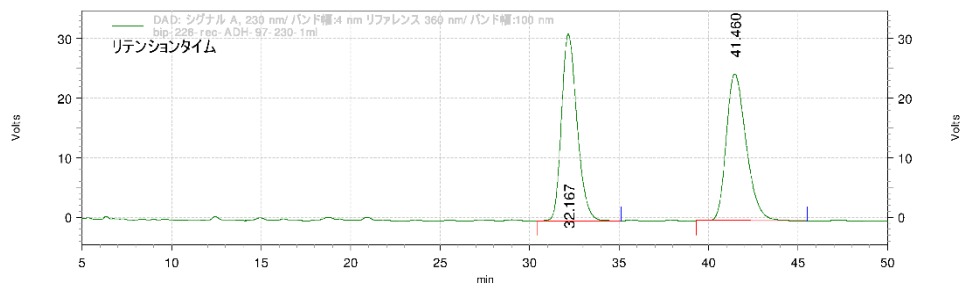

DAD: シグナル A, 230 nm/ バンド幅:4 nm リファレンス  
360 nm/ バンド幅:100 nm 結果  
リテンションタイム

|        | 面積%    |
|--------|--------|
| 32.167 | 49.937 |
| 41.460 | 50.063 |

|    |         |
|----|---------|
| 合計 | 100.000 |
|----|---------|

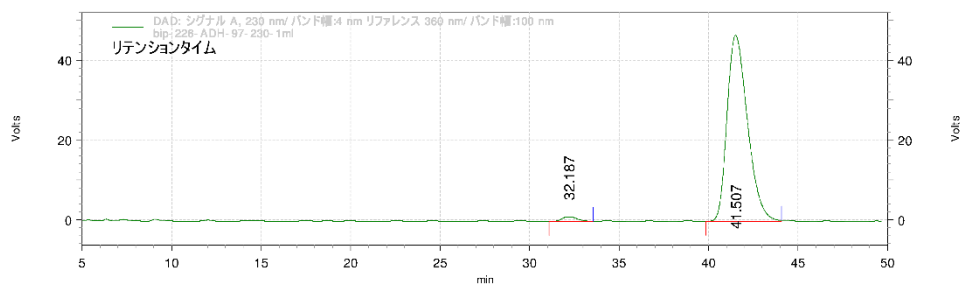

DAD: シグナル A, 230 nm/ バンド幅:4 nm リファレンス  
360 nm/ バンド幅:100 nm 結果  
リテンションタイム

|        | 面積%    |
|--------|--------|
| 32.187 | 1.854  |
| 41.507 | 98.146 |

|    |         |
|----|---------|
| 合計 | 100.000 |
|----|---------|

# HPLC chromatogram of **3k**:

Daicel Chiralpak AD-H, hexane/*i*-PrOH = 97/3, flow rate = 1.0 mL/min,  $\lambda$  = 230 nm, retention time;  
 $t_R$ (minor) = 16.0 min,  $t_R$ (major) = 20.3 min.

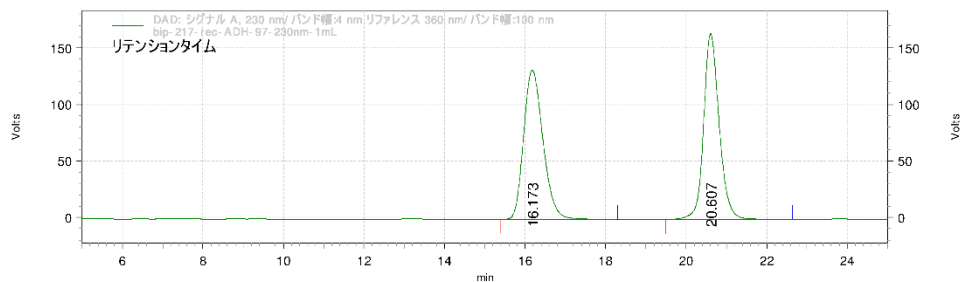

DAD: シグナル A, 230 nm/ バンド幅:4 nm/ リファレンス  
360 nm/ バンド幅:100 nm 結果  
リテンションタイム

|        | 面積%    |
|--------|--------|
| 16.173 | 50.017 |
| 20.607 | 49.983 |

|    |         |
|----|---------|
| 合計 | 100.000 |
|----|---------|

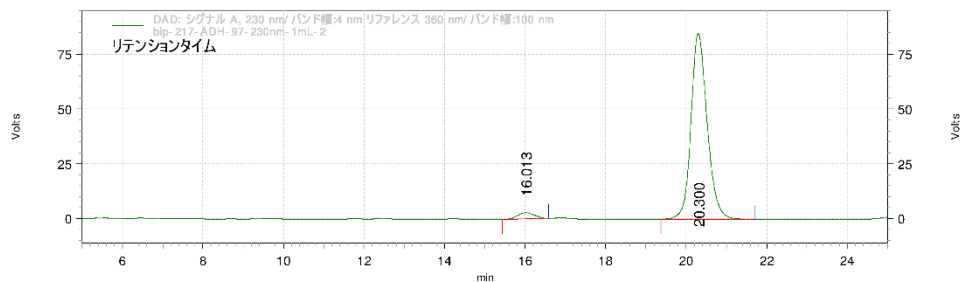

DAD: シグナル A, 230 nm/ バンド幅:4 nm/ リファレンス  
360 nm/ バンド幅:100 nm 結果  
リテンションタイム

|        | 面積%    |
|--------|--------|
| 16.013 | 3.419  |
| 20.300 | 96.581 |

|    |         |
|----|---------|
| 合計 | 100.000 |
|----|---------|

HPLC chromatogram of **3l**:  
Daicel Chiralpak AD-H, hexane/*i*-PrOH = 97/3, flow rate = 1.0 mL/min,  $\lambda$  = 230 nm, retention time;  
 $t_R$ (minor) = 22.2 min,  $t_R$ (major) = 25.0 min.

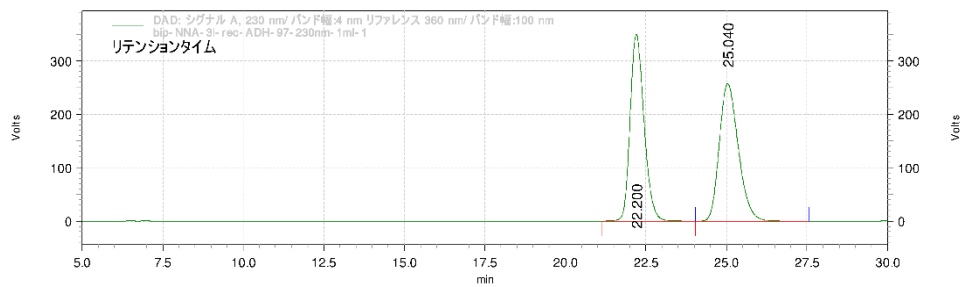

| DAD: シグナル A, 230 nm/ バンド幅:4 nm リファレンス 360 nm/ バンド幅:100 nm 結果<br>リテンションタイム |  | 面積%     |
|---------------------------------------------------------------------------|--|---------|
| 22.200                                                                    |  | 49.839  |
| 25.040                                                                    |  | 50.161  |
| 合計                                                                        |  | 100.000 |

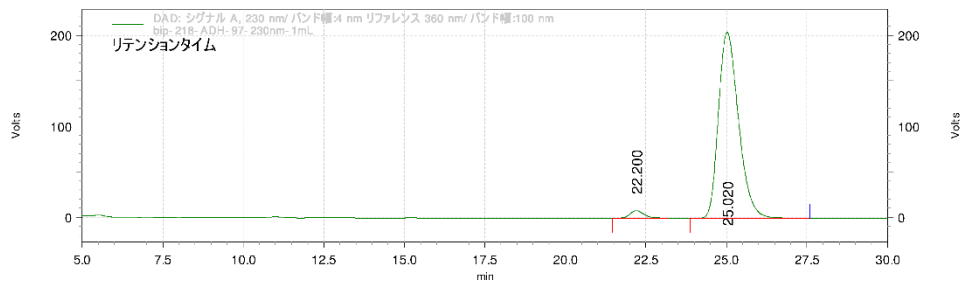

| DAD: シグナル A, 230 nm/ バンド幅:4 nm リファレンス 360 nm/ バンド幅:100 nm 結果<br>リテンションタイム |  | 面積%     |
|---------------------------------------------------------------------------|--|---------|
| 22.200                                                                    |  | 2.693   |
| 25.020                                                                    |  | 97.307  |
| 合計                                                                        |  | 100.000 |

HPLC chromatogram of **3m**:

Daicel Chiralpak OD-H, hexane/*i*-PrOH = 99/1, flow rate = 1.0 mL/min,  $\lambda$  = 210 nm, retention time;  
 $t_R$ (minor) = 10.3 min,  $t_R$ (major) = 11.4 min.

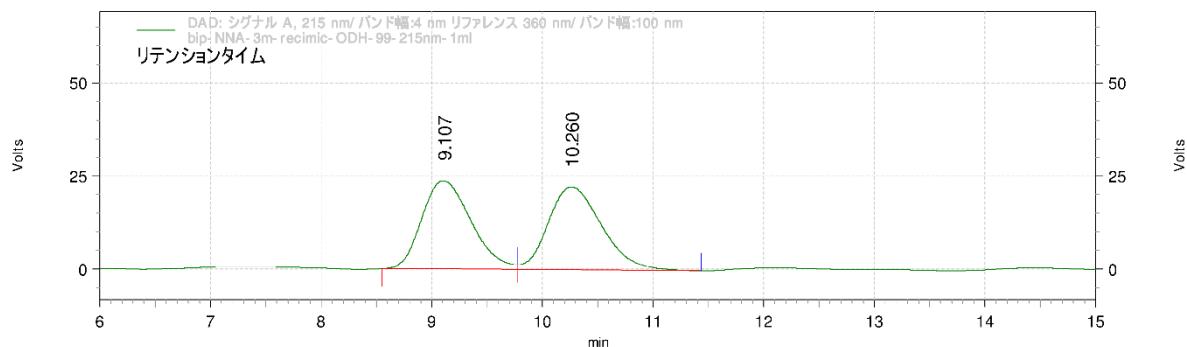

DAD: シグナル A, 215 nm/ バンド幅:4 nm リファレンス  
 360 nm/ バンド幅:100 nm 結果  
 リテンションタイム

|        | 面積%    |
|--------|--------|
| 9.107  | 49.486 |
| 10.260 | 50.514 |

|    |         |
|----|---------|
| 合計 | 100.000 |
|----|---------|

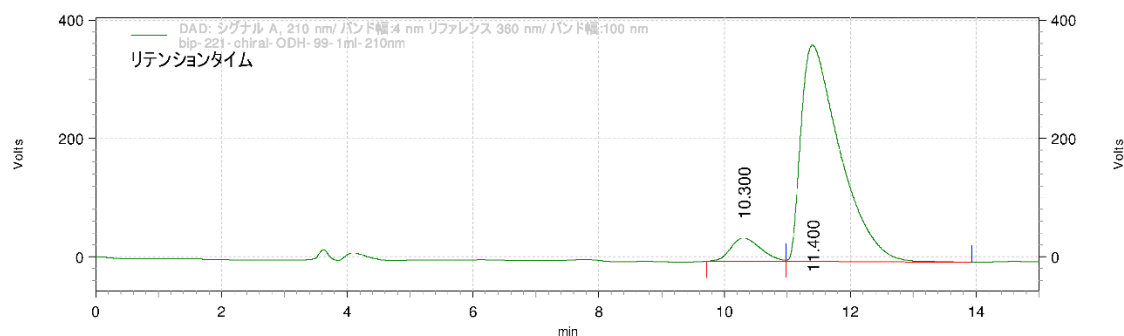

DAD: シグナル A, 210 nm/ バンド幅:4 nm リファレンス  
 360 nm/ バンド幅:100 nm 結果  
 リテンションタイム

|        | 面積%    |
|--------|--------|
| 10.300 | 7.603  |
| 11.400 | 92.397 |

|    |         |
|----|---------|
| 合計 | 100.000 |
|----|---------|

# HPLC chromatogram of **3n**:

Daicel Chiralpak OD-H, hexane/*i*-PrOH = 99/1, flow rate = 1.0 mL/min,  $\lambda$  = 210 nm, retention time;  $t_R$ (minor) = 10.3 min,  $t_R$ (major) = 11.3 min.

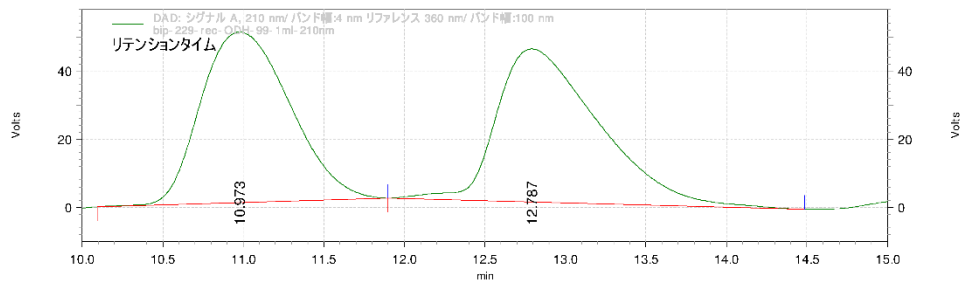

DAD: シグナル A, 210 nm/ バンド幅:4 nm リファレンス  
360 nm/ バンド幅:100 nm 結果  
リテンションタイム

|        | 面積%     |
|--------|---------|
| 10.973 | 49.190  |
| 12.787 | 50.810  |
| 合計     | 100.000 |

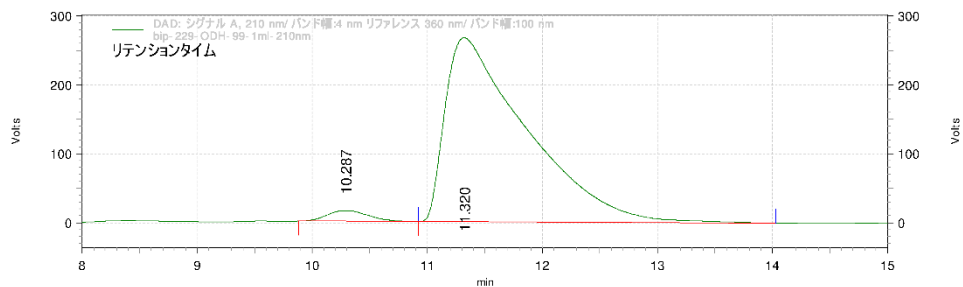

DAD: シグナル A, 210 nm/ バンド幅:4 nm リファレンス  
360 nm/ バンド幅:100 nm 結果  
リテンションタイム

|        | 面積%     |
|--------|---------|
| 10.287 | 2.861   |
| 11.320 | 97.139  |
| 合計     | 100.000 |

# HPLC chromatogram of **3o**:

Daicel Chiralpak AD-H, hexane/*i*-PrOH = 99/1, flow rate = 1.0 mL/min,  $\lambda$  = 210 nm, retention time;  
 $t_R$ (minor) = 30.5 min,  $t_R$ (major) = 38.0 min.

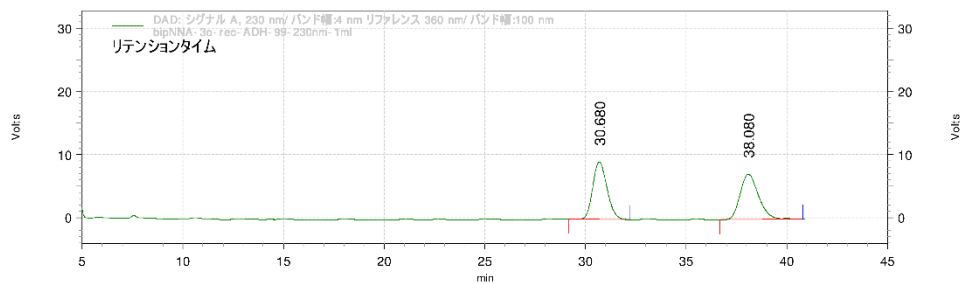

DAD: シグナル A, 230 nm/ バンド幅:4 nm リファレンス  
 360 nm/ バンド幅:100 nm 結果  
 リテンションタイム

|        | 面積%    |
|--------|--------|
| 30.680 | 49.255 |
| 38.080 | 50.745 |

|    |         |
|----|---------|
| 合計 | 100.000 |
|----|---------|

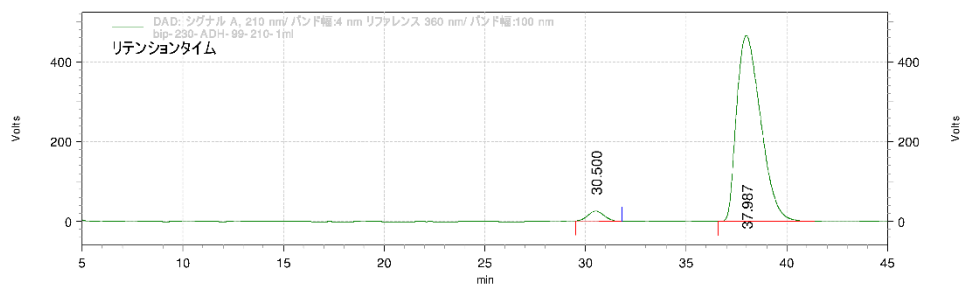

DAD: シグナル A, 210 nm/ バンド幅:4 nm リファレンス  
 360 nm/ バンド幅:100 nm 結果  
 リテンションタイム

|        | 面積%    |
|--------|--------|
| 30.500 | 3.420  |
| 37.987 | 96.580 |

|    |         |
|----|---------|
| 合計 | 100.000 |
|----|---------|



# HPLC chromatogram of **3p**:

Daicel Chiralpak AD-H, hexane/*i*-PrOH = 99/1, flow rate = 1.0 mL/min,  $\lambda$  = 210 nm, retention time;  
 $t_R$ (minor) = 25.0 min,  $t_R$ (major) = 27.8 min.

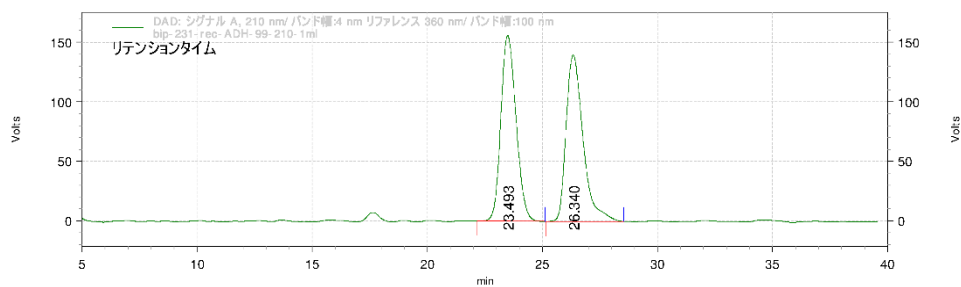

DAD: シグナル A, 210 nm/ バンド幅:4 nm リファレンス  
 360 nm/ バンド幅:100 nm 結果  
 リテンションタイム

|        | 面積%    |
|--------|--------|
| 23.493 | 49.972 |
| 26.340 | 50.028 |

|    |         |
|----|---------|
| 合計 | 100.000 |
|----|---------|

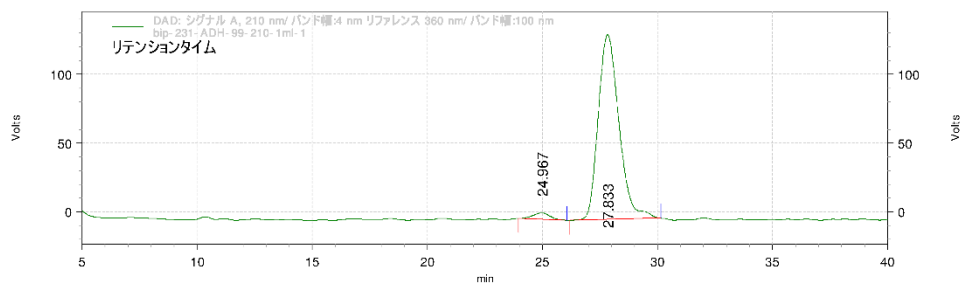

DAD: シグナル A, 210 nm/ バンド幅:4 nm リファレンス  
 360 nm/ バンド幅:100 nm 結果  
 リテンションタイム

|        | 面積%    |
|--------|--------|
| 24.967 | 2.734  |
| 27.833 | 97.266 |

|    |         |
|----|---------|
| 合計 | 100.000 |
|----|---------|

# HPLC chromatogram of **3q**:

Daicel Chiralpak AS-H, hexane/*i*-PrOH = 99/1, flow rate = 1.0 mL/min,  $\lambda$  = 210 nm, retention time;  
 $t_R$ (major) = 11.9 min,  $t_R$ (minor) = 15.4 min.

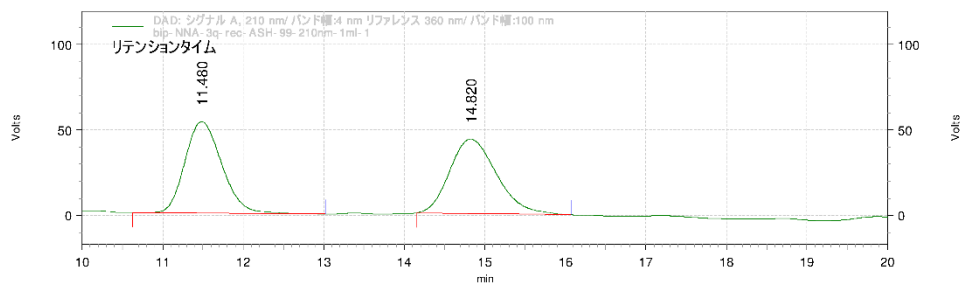

DAD: シグナル A, 210 nm/ バンド幅:4 nm リファレンス  
 360 nm/ バンド幅:100 nm 結果  
 リテンションタイム

| リテンションタイム | 面積%    |
|-----------|--------|
| 11.480    | 49.232 |
| 14.820    | 50.768 |

|    |         |
|----|---------|
| 合計 | 100.000 |
|----|---------|

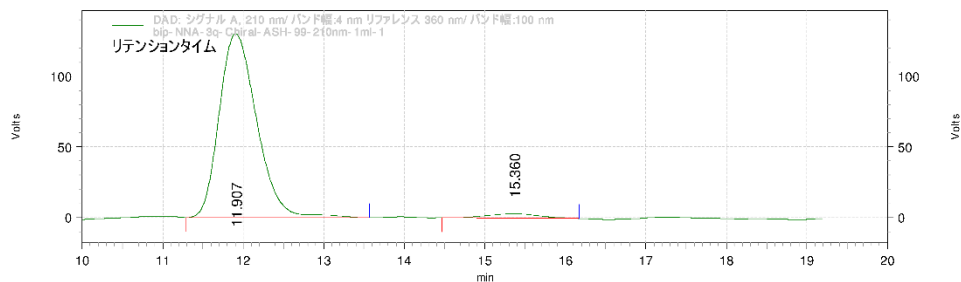

DAD: シグナル A, 210 nm/ バンド幅:4 nm リファレンス  
 360 nm/ バンド幅:100 nm 結果  
 リテンションタイム

| リテンションタイム | 面積%    |
|-----------|--------|
| 11.907    | 96.957 |
| 15.360    | 3.043  |

|    |         |
|----|---------|
| 合計 | 100.000 |
|----|---------|

# HPLC chromatogram of **3r**:

Daicel Chiralpak AD-H, hexane/*i*-PrOH = 97/3, flow rate = 1.0 mL/min,  $\lambda$  = 230 nm, retention time;  
 $t_R$ (minor) = 14.9 min,  $t_R$ (major) = 18.8 min.

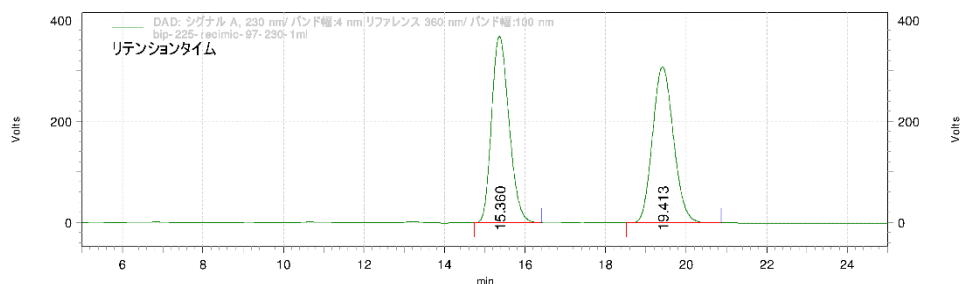

DAD: シグナル A, 230 nm/ バンド幅:4 nm/ リファレンス  
 360 nm/ バンド幅:100 nm 結果  
 リテンションタイム

|        | 面積%    |
|--------|--------|
| 15.360 | 49.778 |
| 19.413 | 50.222 |

|    |         |
|----|---------|
| 合計 | 100.000 |
|----|---------|

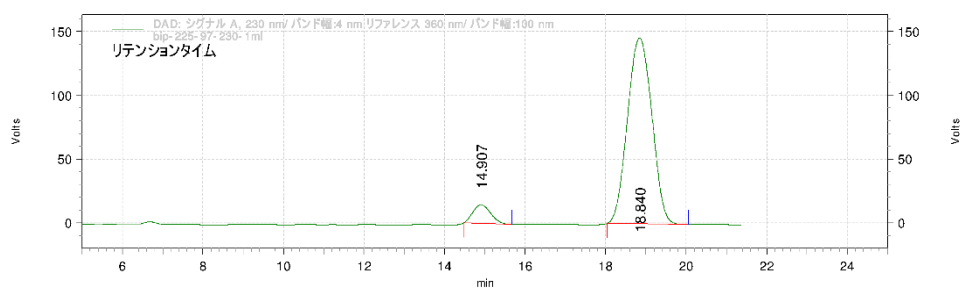

DAD: シグナル A, 230 nm/ バンド幅:4 nm/ リファレンス  
 360 nm/ バンド幅:100 nm 結果  
 リテンションタイム

|        | 面積%    |
|--------|--------|
| 14.907 | 6.874  |
| 18.840 | 93.126 |

|    |         |
|----|---------|
| 合計 | 100.000 |
|----|---------|

HPLC chromatogram of **3s**:

Daicel Chiralpak AS-H, hexane/*i*-PrOH = 97/3, flow rate = 1.0 mL/min,  $\lambda$  = 290 nm, retention time;  
 $t_R$ (major) = 12.5 min,  $t_R$ (minor) = 17.2 min.

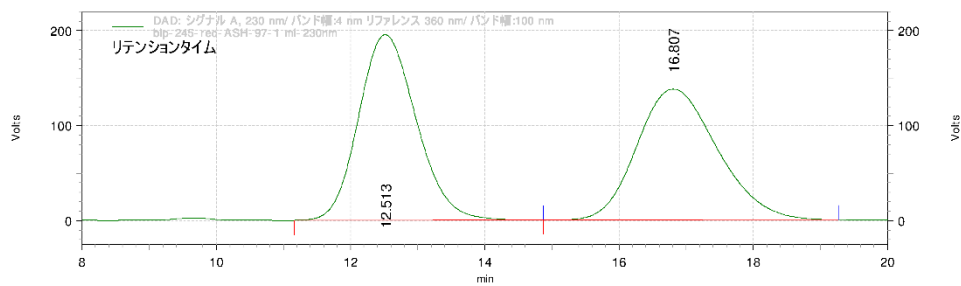

DAD: シグナル A, 230 nm/ バンド幅:4 nm リファレンス  
 360 nm/ バンド幅:100 nm 結果  
 リテンションタイム

|        | 面積%    |
|--------|--------|
| 12.513 | 50.363 |
| 16.807 | 49.637 |

|    |         |
|----|---------|
| 合計 | 100.000 |
|----|---------|

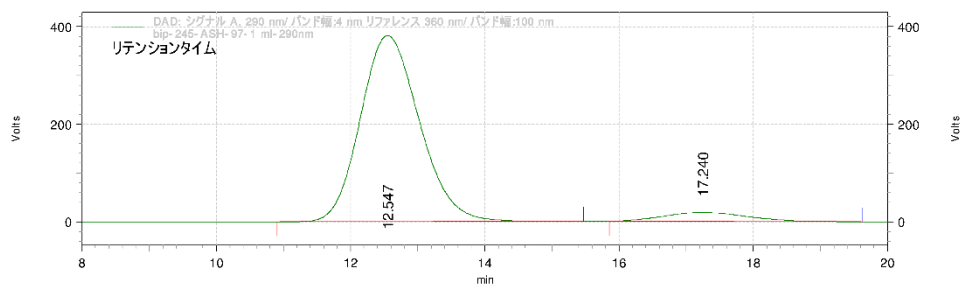

DAD: シグナル A, 290 nm/ バンド幅:4 nm リファレンス  
 360 nm/ バンド幅:100 nm 結果  
 リテンションタイム

|        | 面積%    |
|--------|--------|
| 12.547 | 93.680 |
| 17.240 | 6.320  |

|    |         |
|----|---------|
| 合計 | 100.000 |
|----|---------|

HPLC chromatogram of **3t**:

Daicel Chiralpak AD-H, hexane/*i*-PrOH = 96/4, flow rate = 1.0 mL/min,  $\lambda$  = 240 nm, retention time;  
 $t_R(\text{minor})$  = 40.8 min,  $t_R(\text{major})$  = 44.2 min.

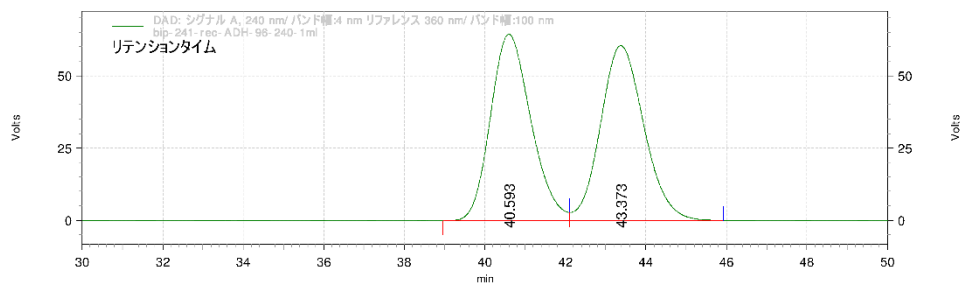

DAD: シグナル A, 240 nm/ バンド幅:4 nm リファレンス  
 360 nm/ バンド幅:100 nm 結果  
 リテンションタイム

|        | 面積%    |
|--------|--------|
| 40.593 | 49.778 |
| 43.373 | 50.222 |

|    |         |
|----|---------|
| 合計 | 100.000 |
|----|---------|

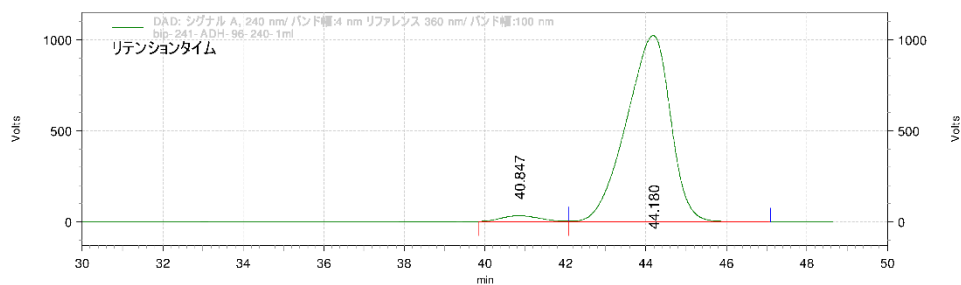

DAD: シグナル A, 240 nm/ バンド幅:4 nm リファレンス  
 360 nm/ バンド幅:100 nm 結果  
 リテンションタイム

|        | 面積%    |
|--------|--------|
| 40.847 | 2.695  |
| 44.180 | 97.305 |

|    |         |
|----|---------|
| 合計 | 100.000 |
|----|---------|

# HPLC chromatogram of **3u**:

Daicel Chiralpak AD-H, hexane/*i*-PrOH = 95/5, flow rate = 1.0 mL/min,  $\lambda$  = 230 nm, retention time;  $t_R$ (major) = 37.7 min,  $t_R$ (minor) = 43.0 min.

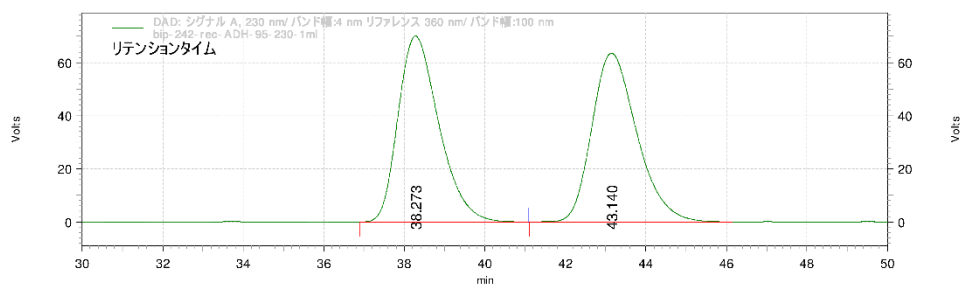

DAD: シグナル A, 230 nm/ バンド幅:4 nm リファレンス  
360 nm/ バンド幅:100 nm 結果  
リテンションタイム

|        | 面積%    |
|--------|--------|
| 38.273 | 49.908 |
| 43.140 | 50.092 |

|    |         |
|----|---------|
| 合計 | 100.000 |
|----|---------|

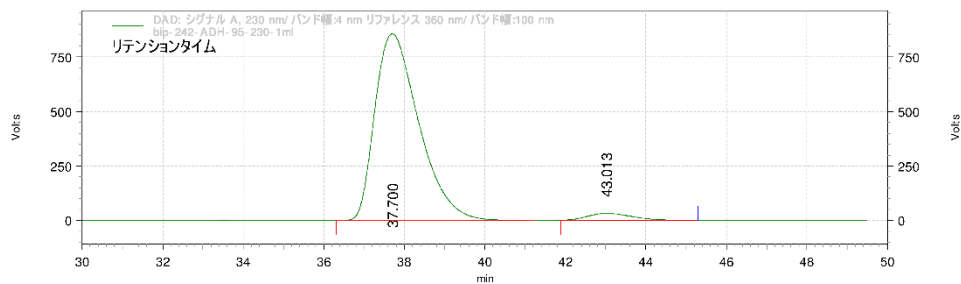

DAD: シグナル A, 230 nm/ バンド幅:4 nm リファレンス  
360 nm/ バンド幅:100 nm 結果  
リテンションタイム

|        | 面積%    |
|--------|--------|
| 37.700 | 96.283 |
| 43.013 | 3.717  |

|    |         |
|----|---------|
| 合計 | 100.000 |
|----|---------|

# HPLC chromatogram of **4c**:

Daicel Chiralpak AD-H, hexane/*i*-PrOH = 94/6, flow rate = 1.0 mL/min,  $\lambda$  = 215 nm, retention time;  $t_R$ (minor) = 13.7 min,  $t_R$ (major) = 24.2 min.

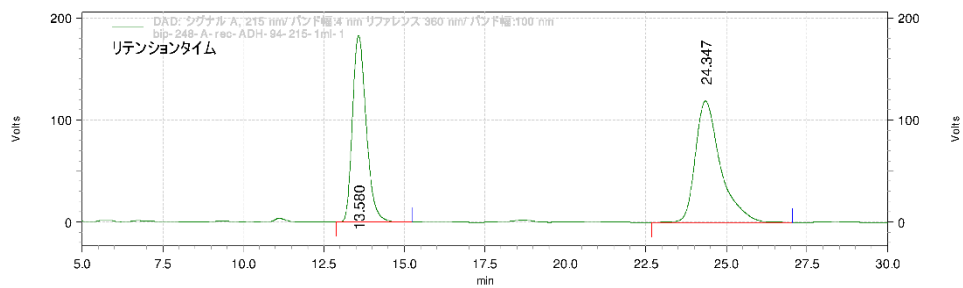

DAD: シグナル A, 215 nm/ バンド幅:4 nm リファレンス  
 360 nm/ バンド幅:100 nm 結果  
 リテンションタイム

|        | 面積%    |
|--------|--------|
| 13.580 | 45.702 |
| 24.347 | 54.298 |

|    |         |
|----|---------|
| 合計 | 100.000 |
|----|---------|

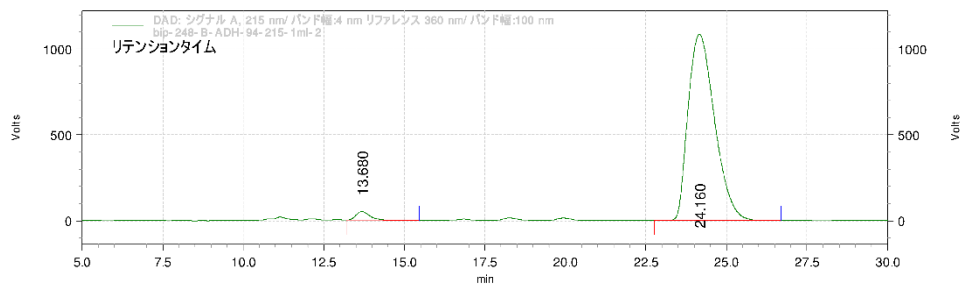

DAD: シグナル A, 215 nm/ バンド幅:4 nm リファレンス  
 360 nm/ バンド幅:100 nm 結果  
 リテンションタイム

|        | 面積%    |
|--------|--------|
| 13.680 | 2.352  |
| 24.160 | 97.648 |

|    |         |
|----|---------|
| 合計 | 100.000 |
|----|---------|

# HPLC chromatogram of **5c-Boc**:

Daicel Chiralpak AD-H, hexane/*i*-PrOH = 99/1, flow rate = 1.0 mL/min,  $\lambda$  = 215 nm, retention time;  
 $t_R$ (minor) = 21.6 min,  $t_R$ (major) = 26.2 min.

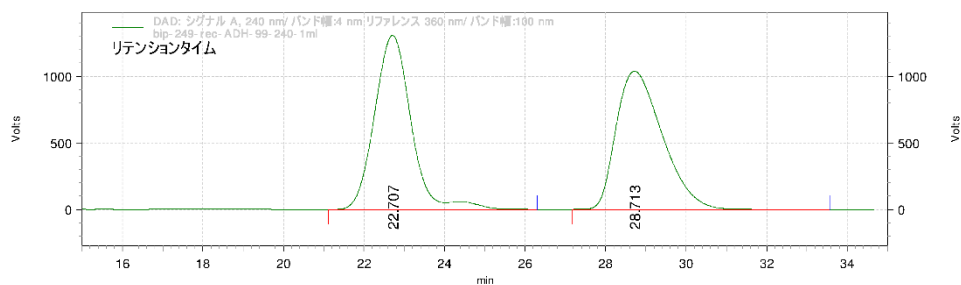

DAD: シグナル A, 240 nm/ バンド幅:4 nm リファレンス  
 360 nm/ バンド幅:100 nm 結果  
 リテンションタイム

|        | 面積%    |
|--------|--------|
| 22.707 | 50.037 |
| 28.713 | 49.963 |

|    |         |
|----|---------|
| 合計 | 100.000 |
|----|---------|

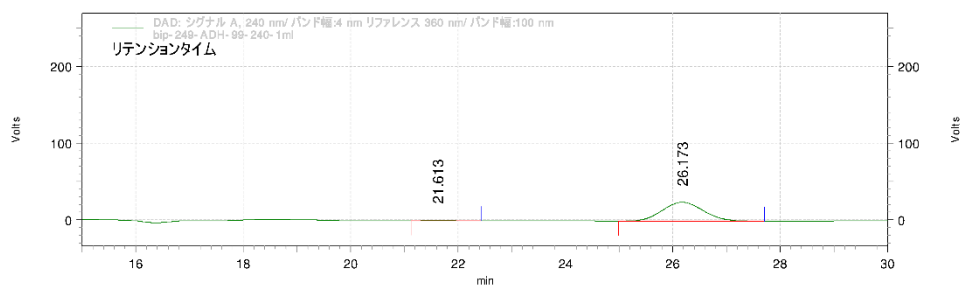

DAD: シグナル A, 240 nm/ バンド幅:4 nm リファレンス  
 360 nm/ バンド幅:100 nm 結果  
 リテンションタイム

|        | 面積%    |
|--------|--------|
| 21.613 | 2.649  |
| 26.173 | 97.351 |

|    |         |
|----|---------|
| 合計 | 100.000 |
|----|---------|
